# Supplementary material for: Design, synthesis, in silico docking studies and biological evaluation of novel quinoxaline-hydrazide hydrazone-1,2,3-triazole hybrids as α-glucosidase inhibitors and antioxidants
Source: Royal Society of Chemistry journal article supplement (doi:10.1039/c9nj02580d), 2019-01-01
Supplement: c9nj02580d1.pdf [file c9nj02580d1.pdf]

**Submitted to New Journal of Chemistry**

(Manuscript ID: NJ-ART-05-2019-002580)

**Design, Synthesis, *In silico* docking studies and biological evaluation of novel quinoxaline-hydrazide hydrazone-1,2,3-triazole hybrids as  $\alpha$ -glucosidase inhibitors, antioxidants**

Settypalli Triloknadh,<sup>a</sup> Chunduri Venkata Rao<sup>\*a</sup>, Maddineni Aruna Kumari<sup>a</sup>, Begari Nagaraju<sup>a</sup>,  
Allagadda Rajasekhar,<sup>b</sup> Kotha Peddanna<sup>b</sup> and Chippada Appa Rao<sup>b</sup>

<sup>a</sup>Department of Chemistry, <sup>b</sup>Department of Biochemistry, Sri Venkateswara University, Tirupati-517502, Andhra Pradesh, India.

<sup>\*a</sup> **Corresponding author:** Prof. Chunduri Venkata Rao

E-Mail: cvrsvu@gmail.com, Tel: +91 9849605140, Fax: +918772289555.

**ORCID:** 0000-0001-8008-3763

**First author:** Dr. Settypalli Triloknadh

**ORCID:** 0000-0001-8106-1646

**CONTENTS**

|                                                                      | <b>Pg. No</b> |
|----------------------------------------------------------------------|---------------|
| <b><sup>1</sup>H-NMR Spectra of synthesized compounds - - - - -</b>  | <b>1-21</b>   |
| <b><sup>13</sup>C-NMR Spectra of synthesized compounds - - - - -</b> | <b>22-35</b>  |
| <b>MASS Spectra of synthesized compounds- - - - -</b>                | <b>36-53</b>  |

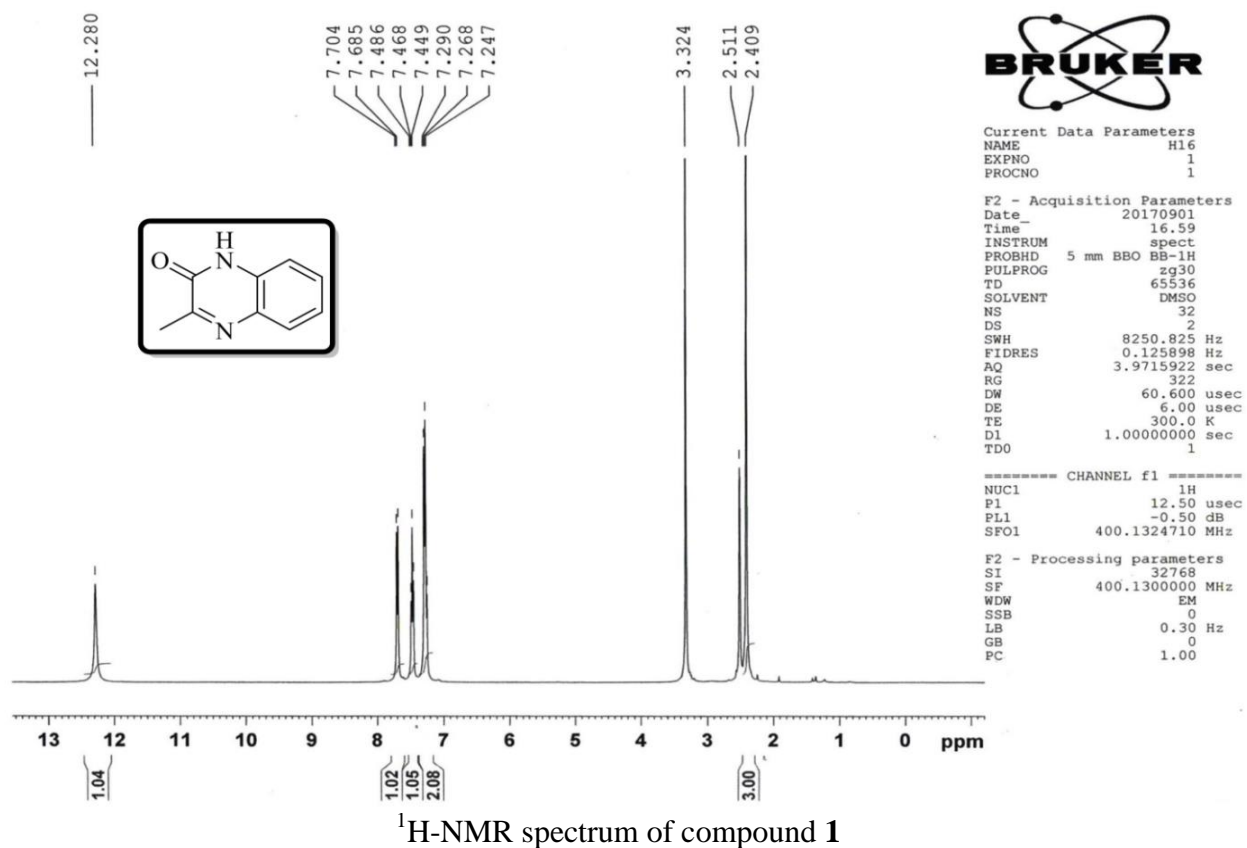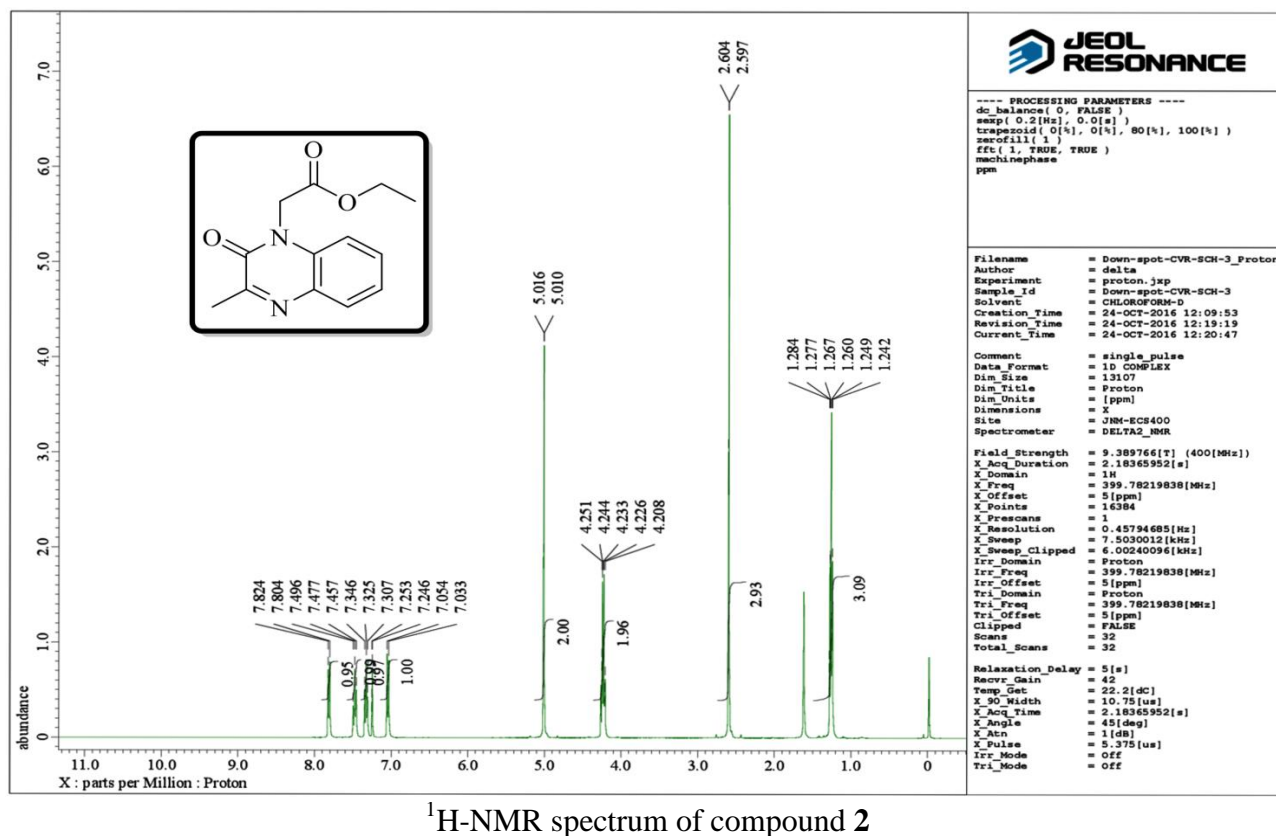

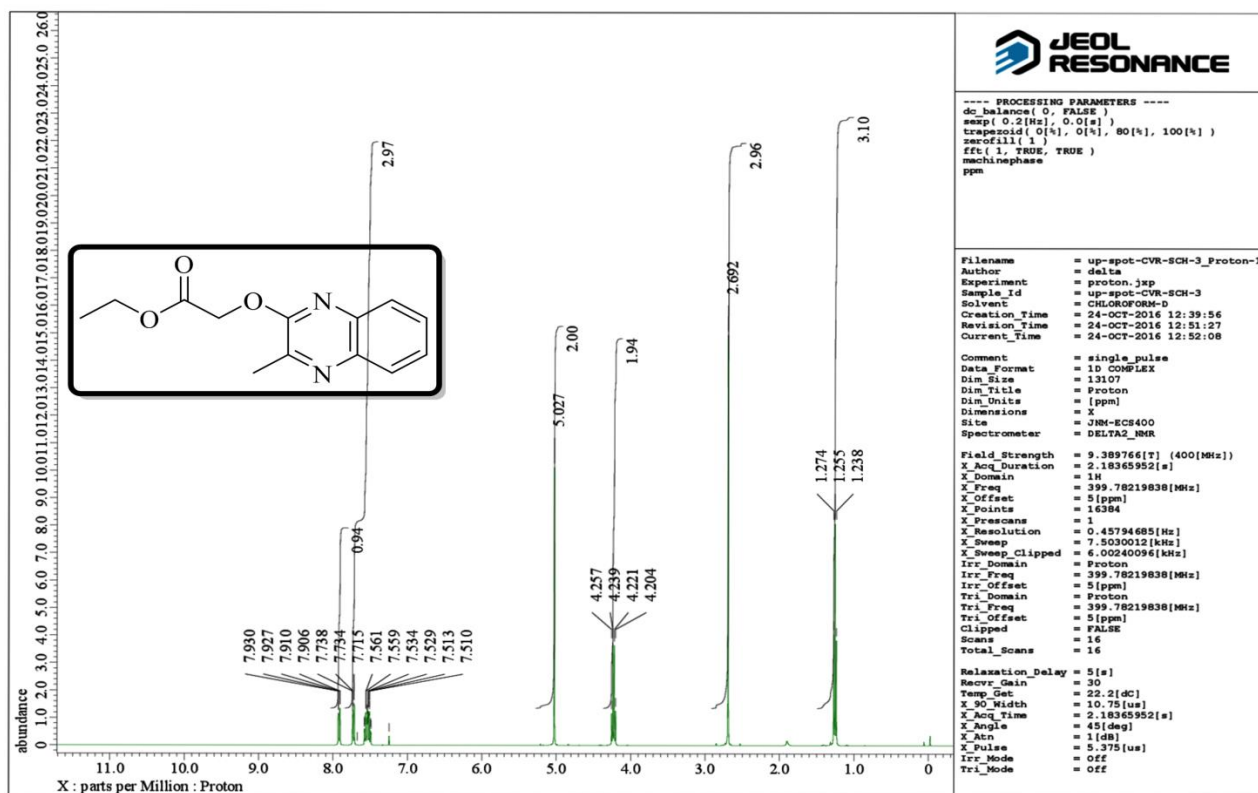

<sup>1</sup>H-NMR spectrum of compound 2a

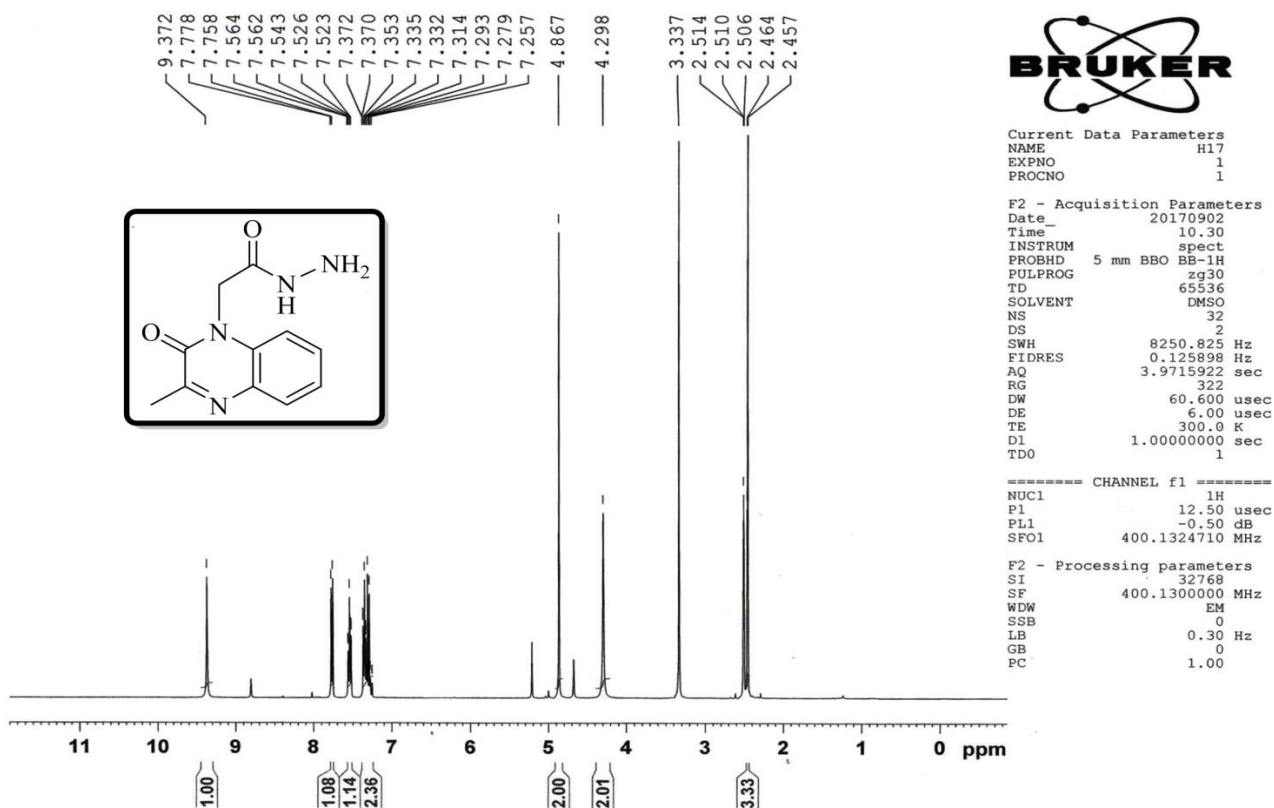

<sup>1</sup>H-NMR spectrum of compound 3

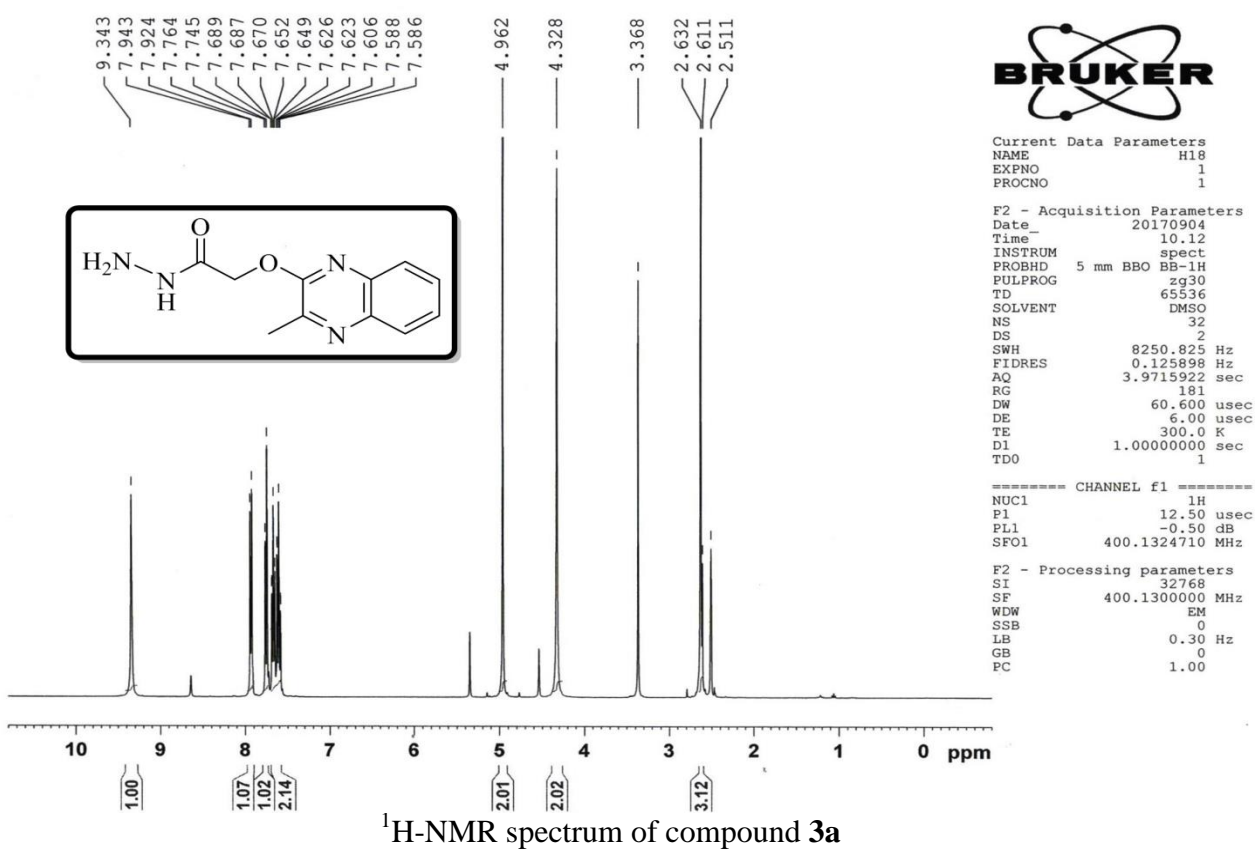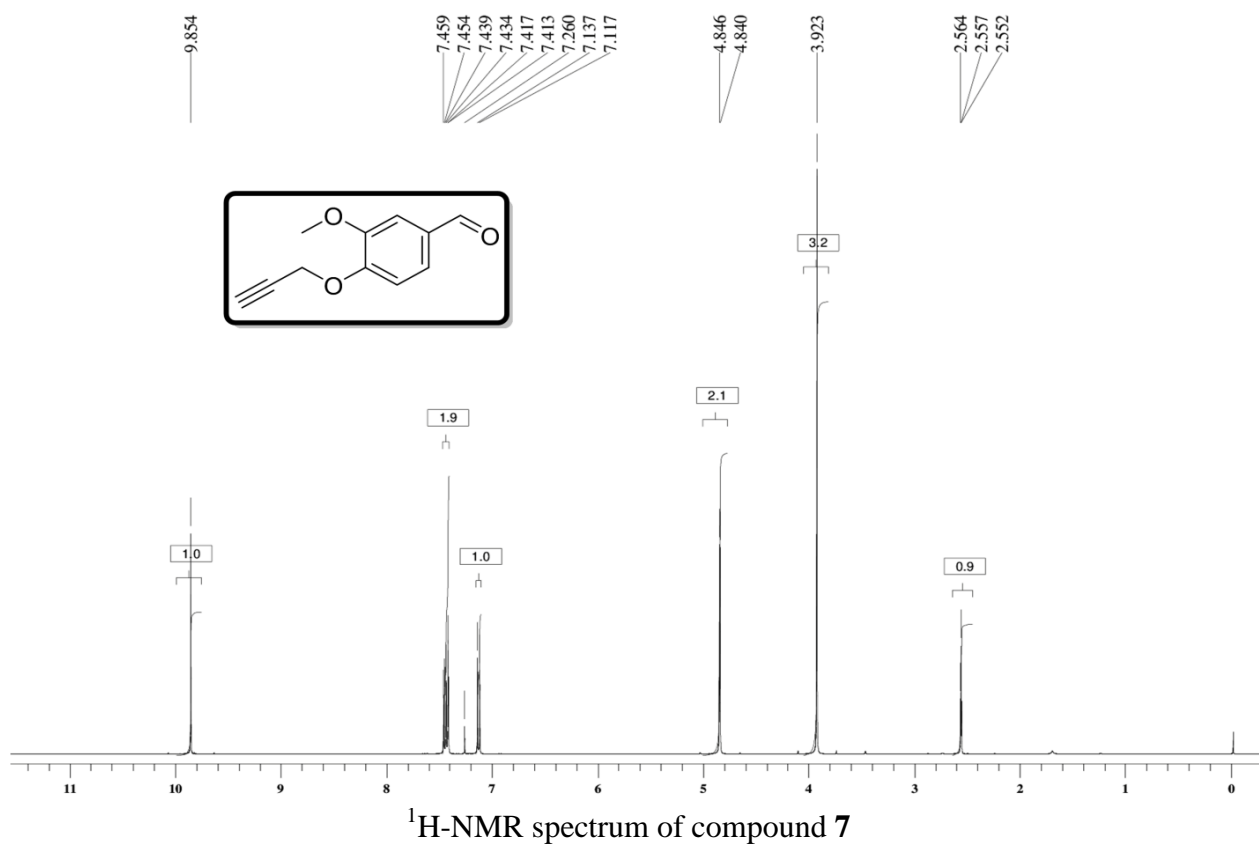



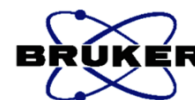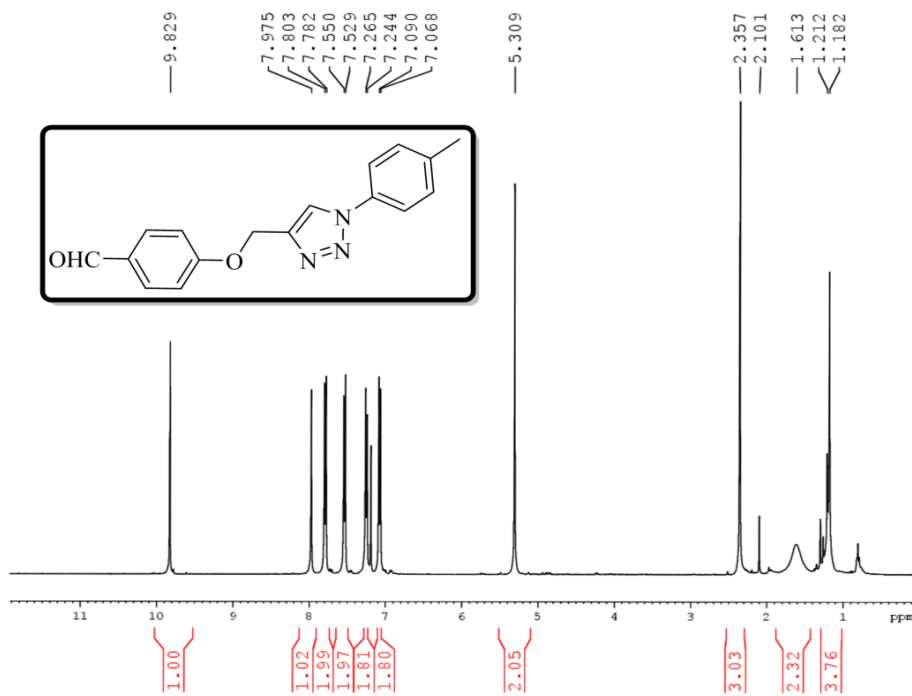

Current Data Parameters  
NAME NKS41114  
EXPNO 1  
PROCNO 1

F2 - Acquisition Parameters  
Date 20141111  
Time 16.31  
INSTRUM spect  
PROBHD 5 mm PABBO BB/  
PULPROG zg30  
TD 65536  
SOLVENT CDCl<sub>3</sub>  
NS 16  
DS 2  
SWH 8223.695 Hz  
FIDRES 0.125483 Hz  
AQ 3.9845889 sec  
RG 143.73  
DW 60.800 usec  
DE 6.50 usec  
TE 296.0 K  
D1 1.00000000 sec  
TDO 1

===== CHANNEL f1 =====  
NUC1 1H  
P1 14.25 usec  
PLW1 14.00000000 W  
SF01 400.2604718 MHz

F2 - Processing parameters  
SI 65536  
SF 400.2580383 MHz  
WDW EM  
SSB 0  
LB 0.30 Hz  
GB 0  
PC 1.00

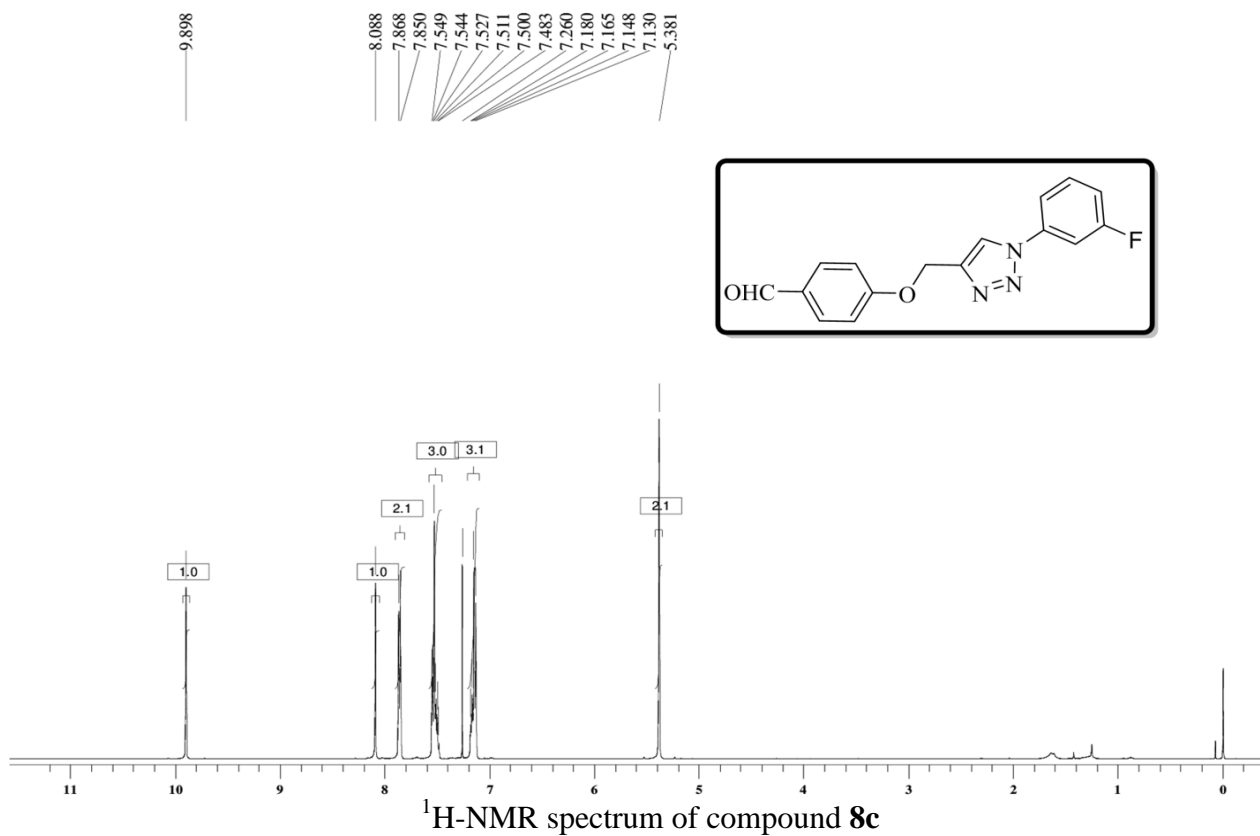

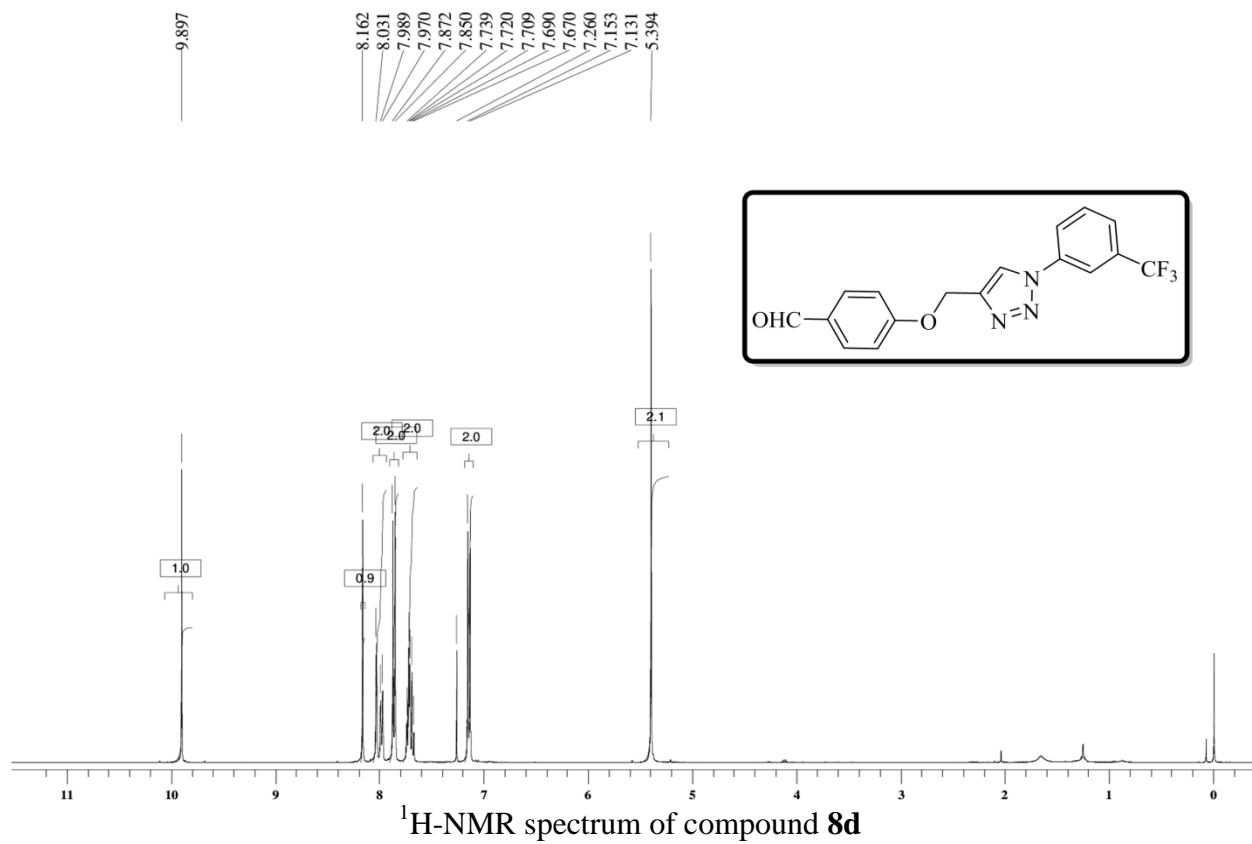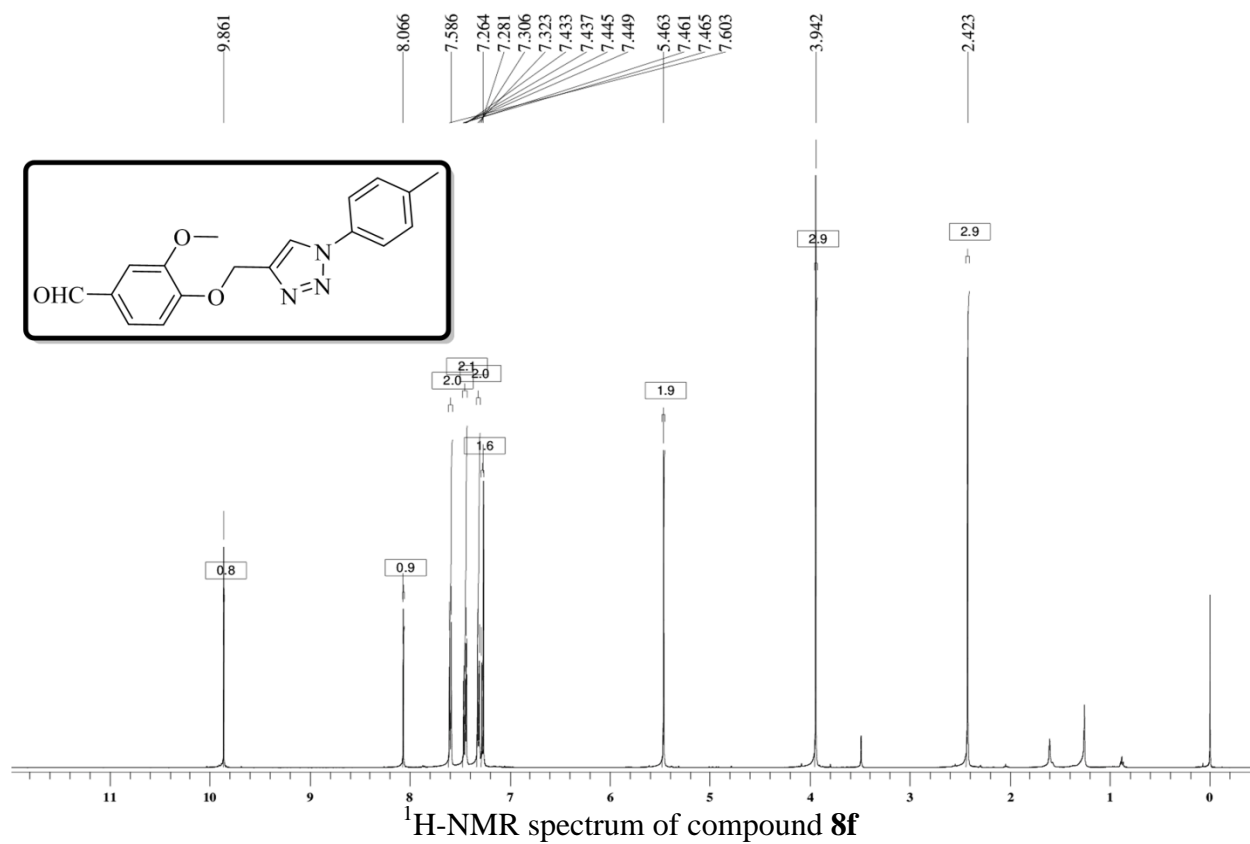

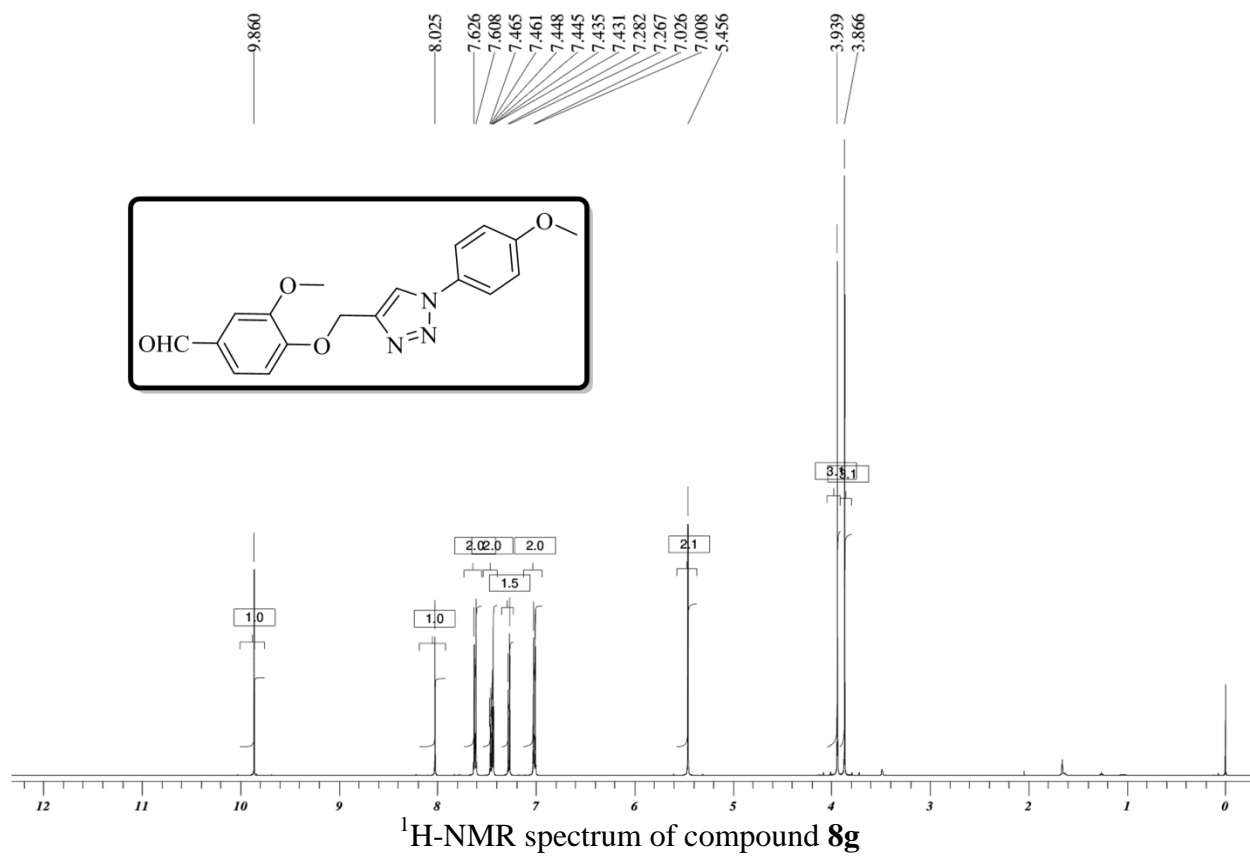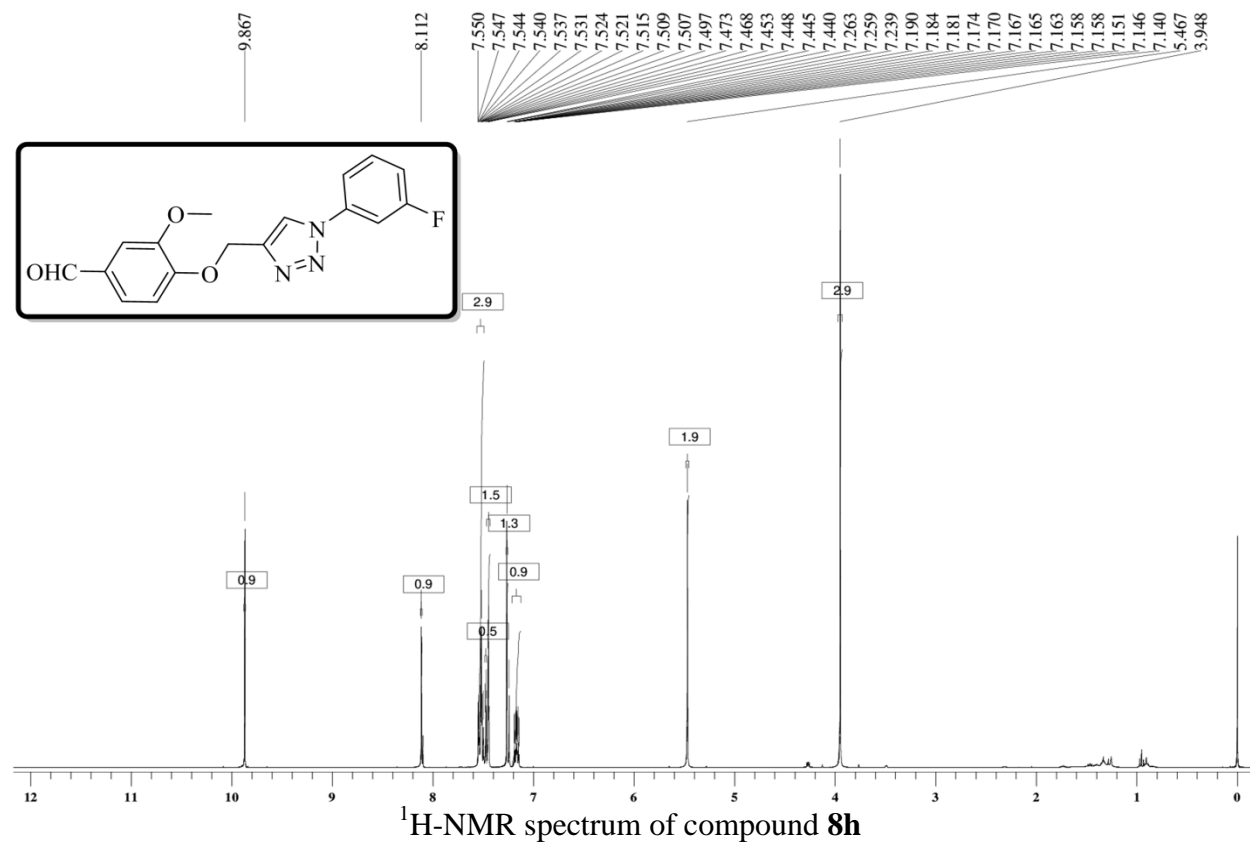

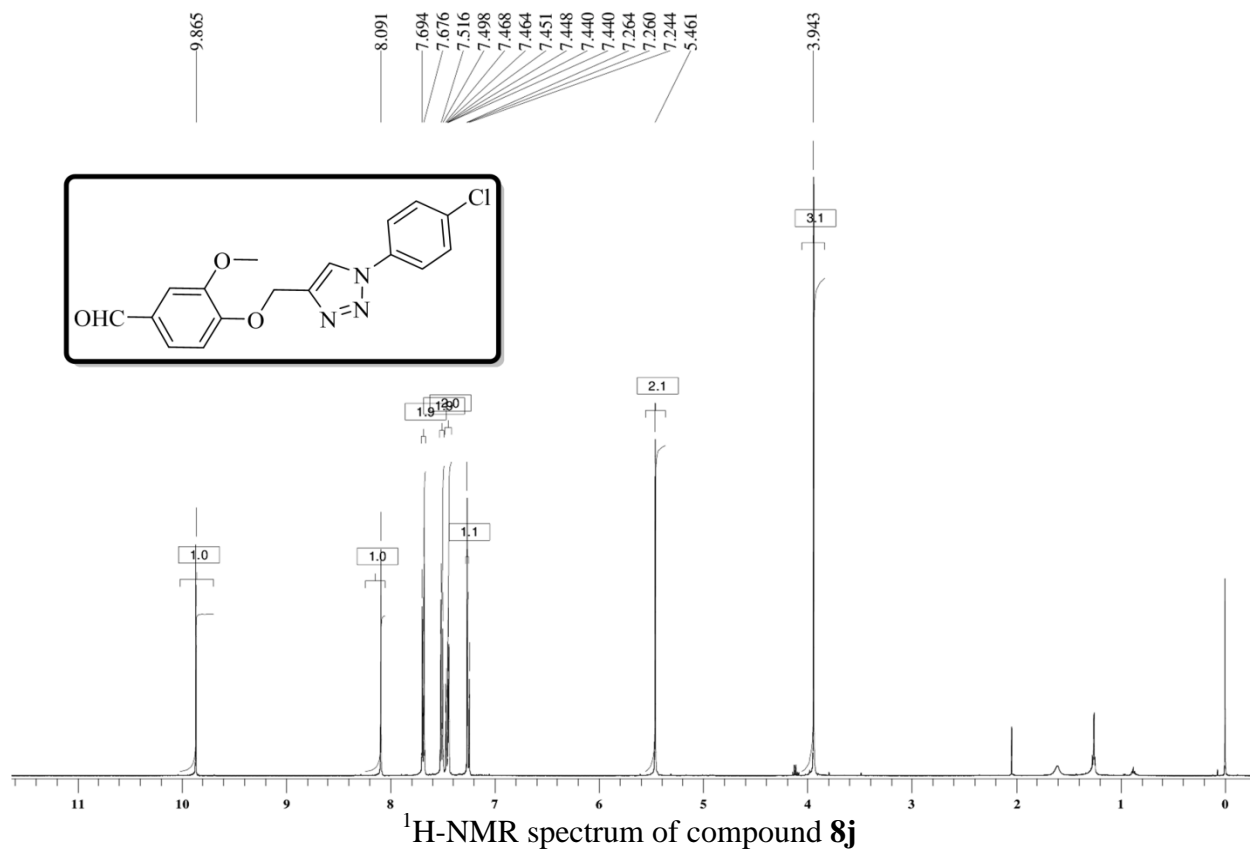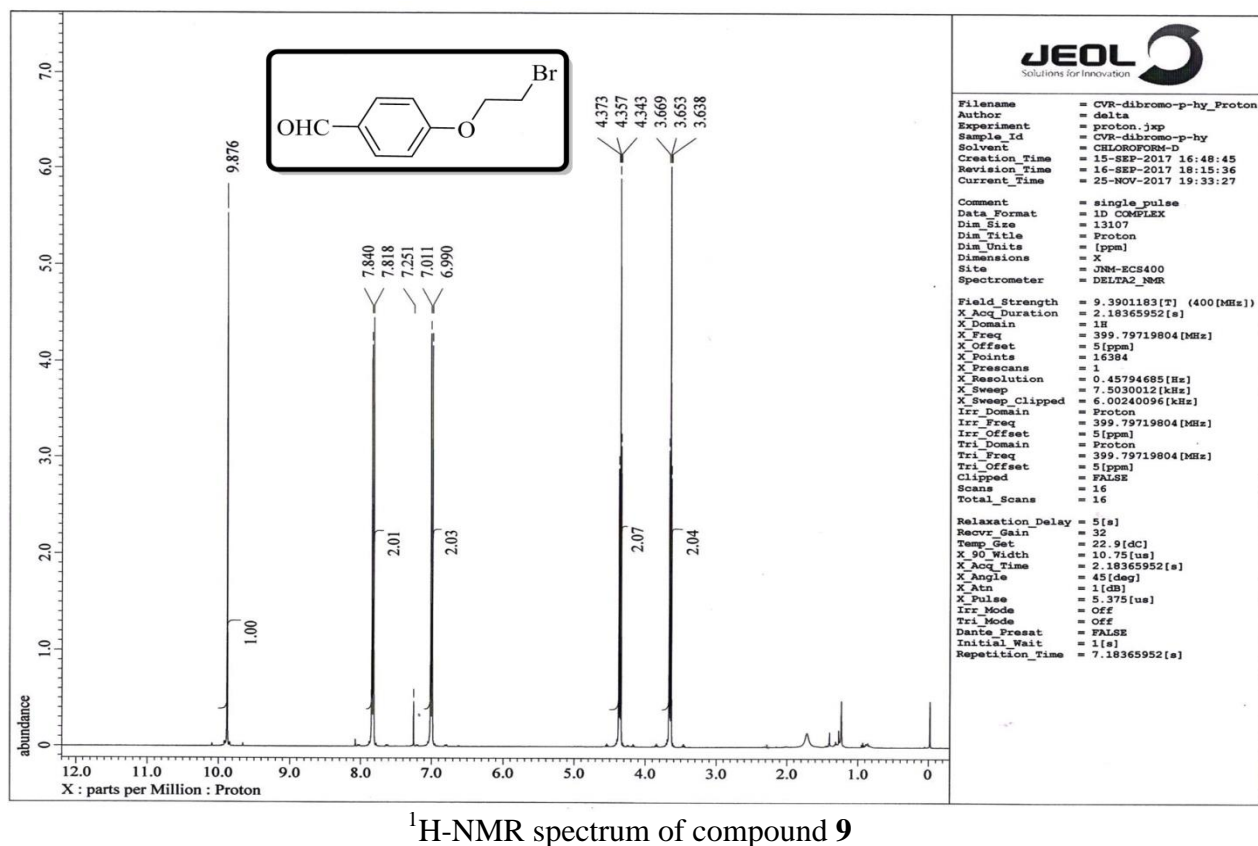

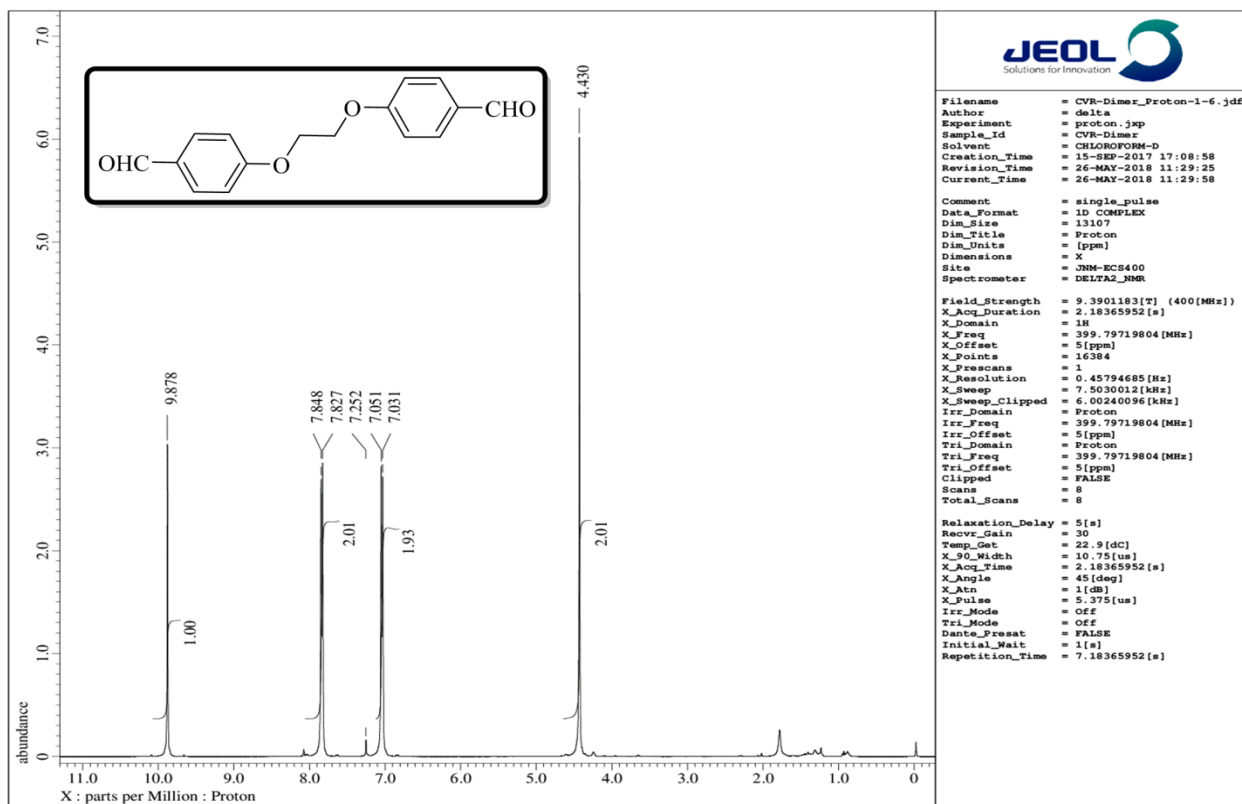

<sup>1</sup>H-NMR spectrum of compound 9a

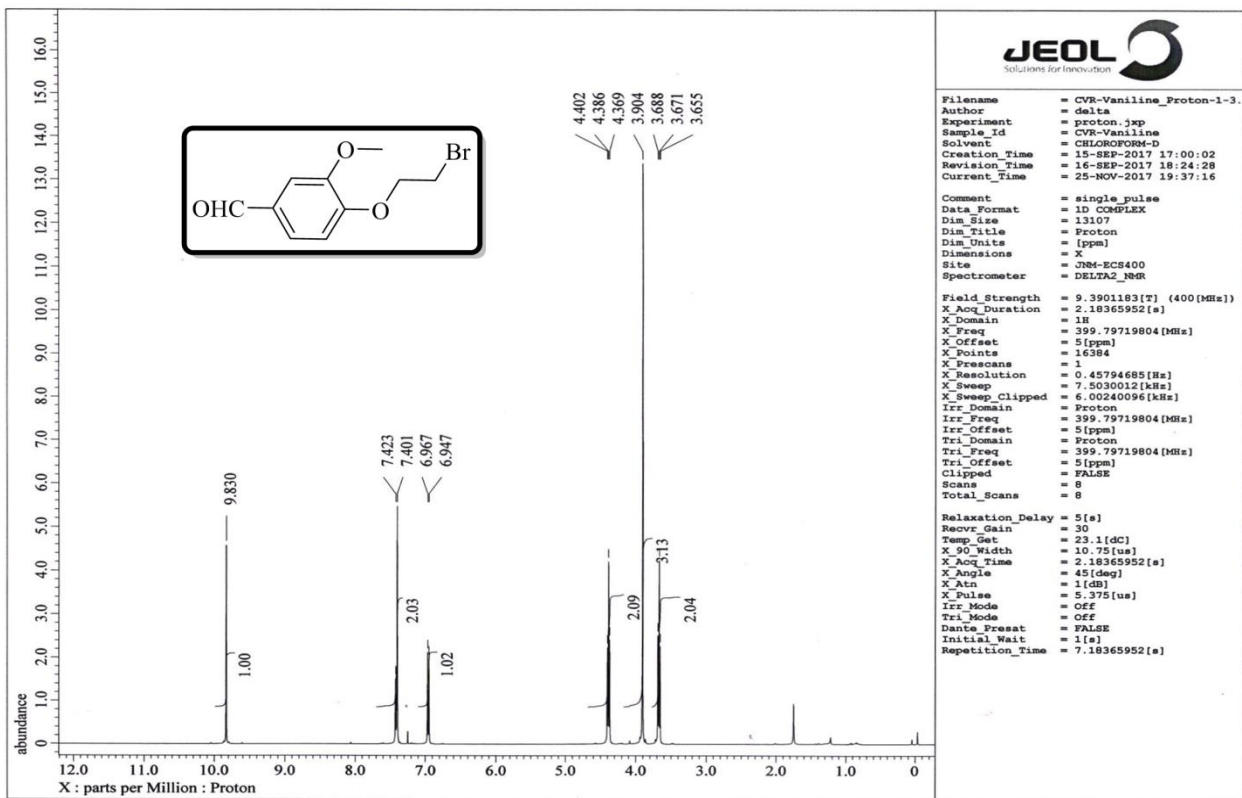

<sup>1</sup>H-NMR spectrum of compound 10

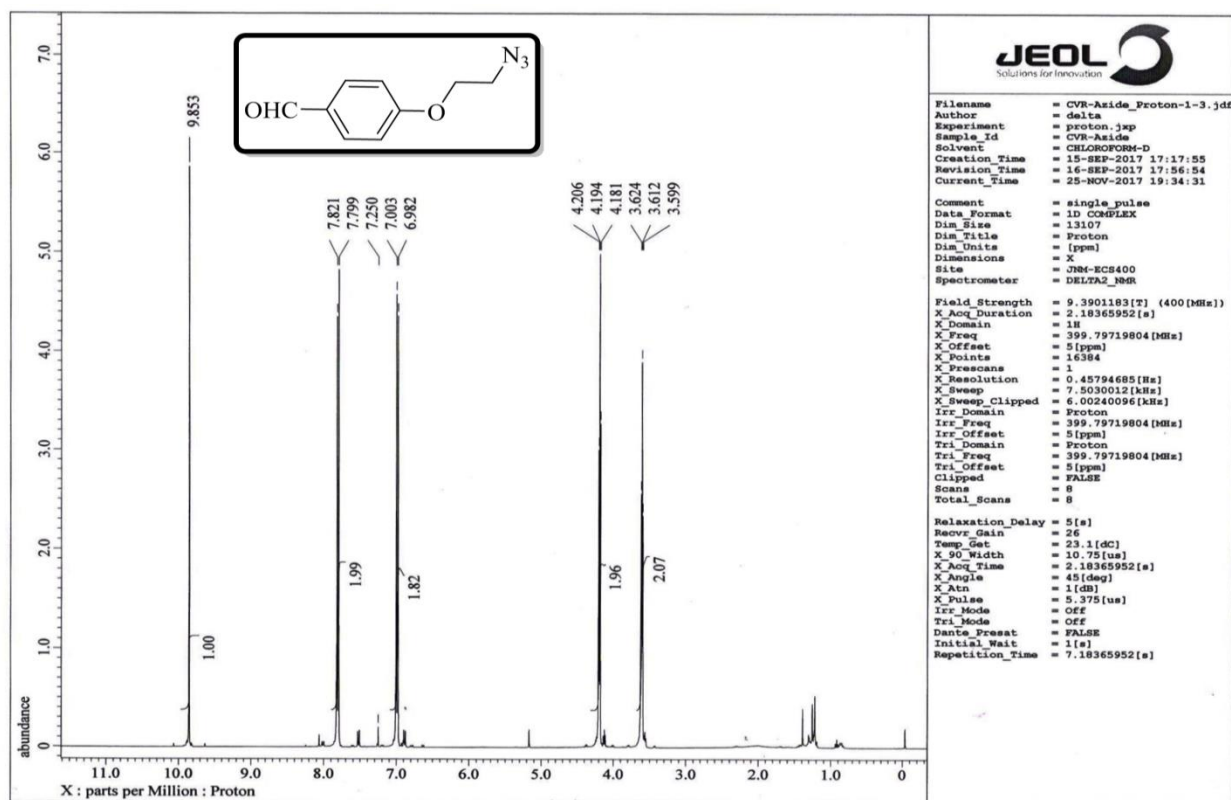

<sup>1</sup>H-NMR spectrum of compound 11

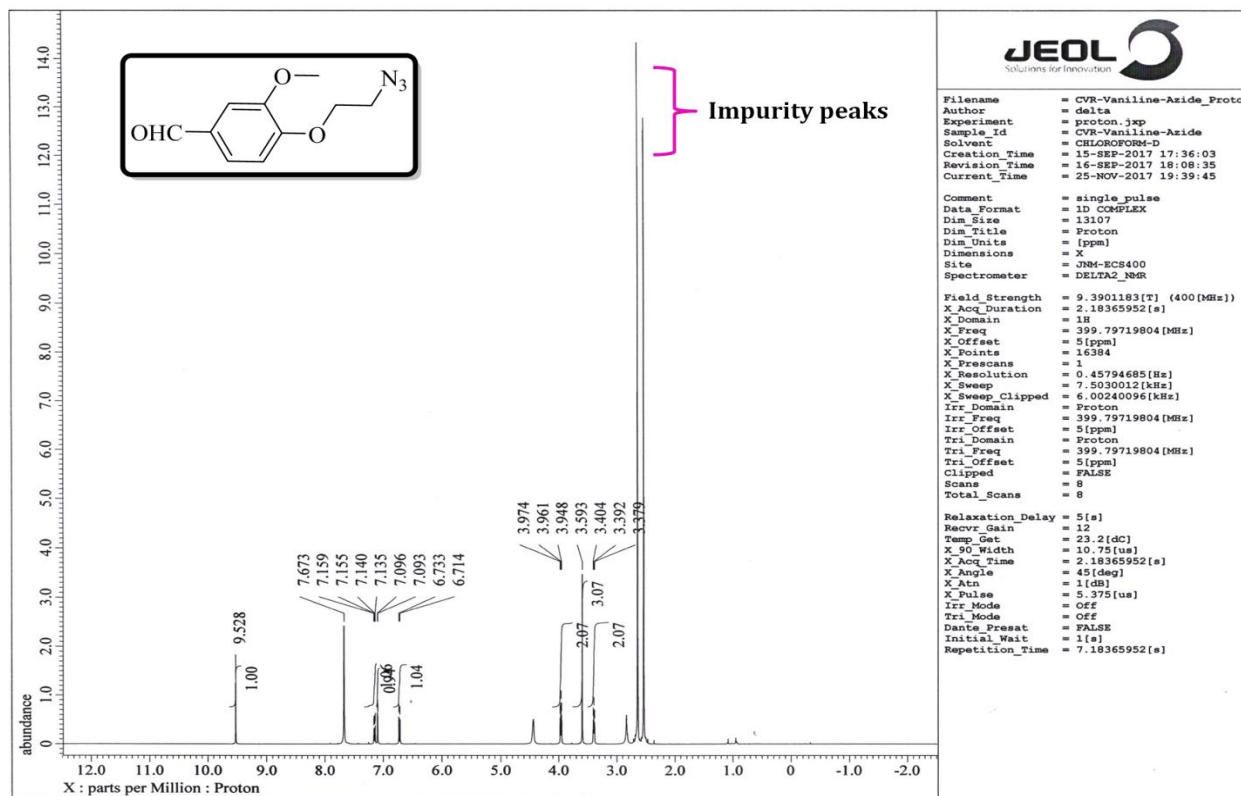

<sup>1</sup>H-NMR spectrum of compound 12



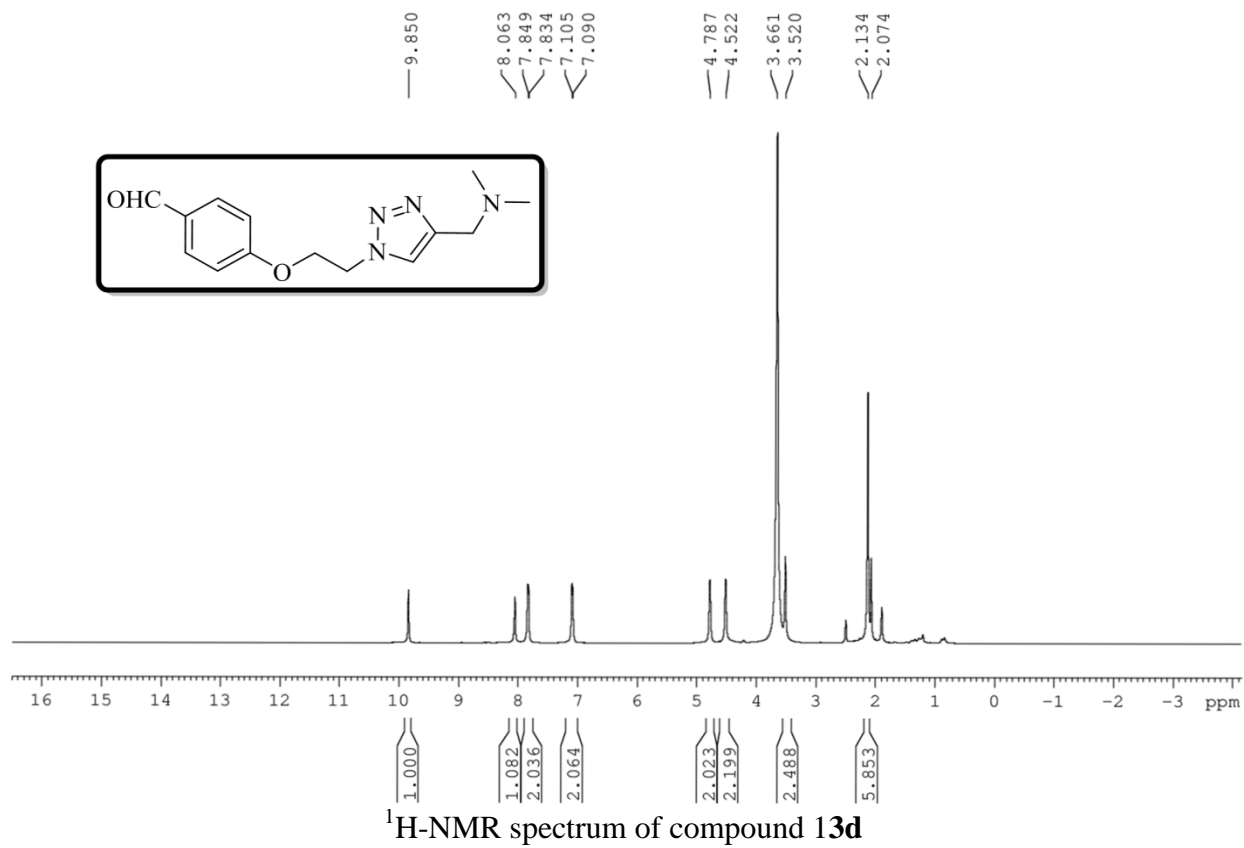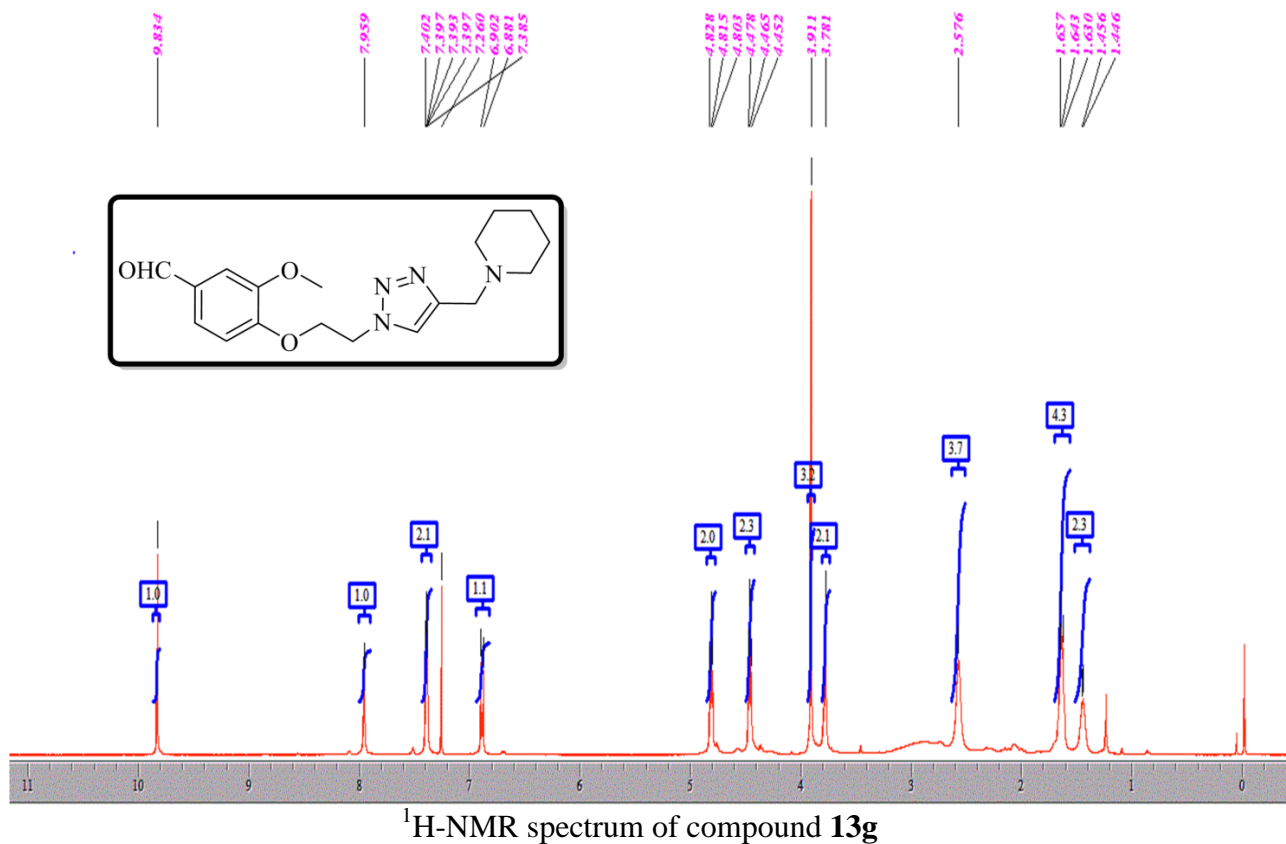

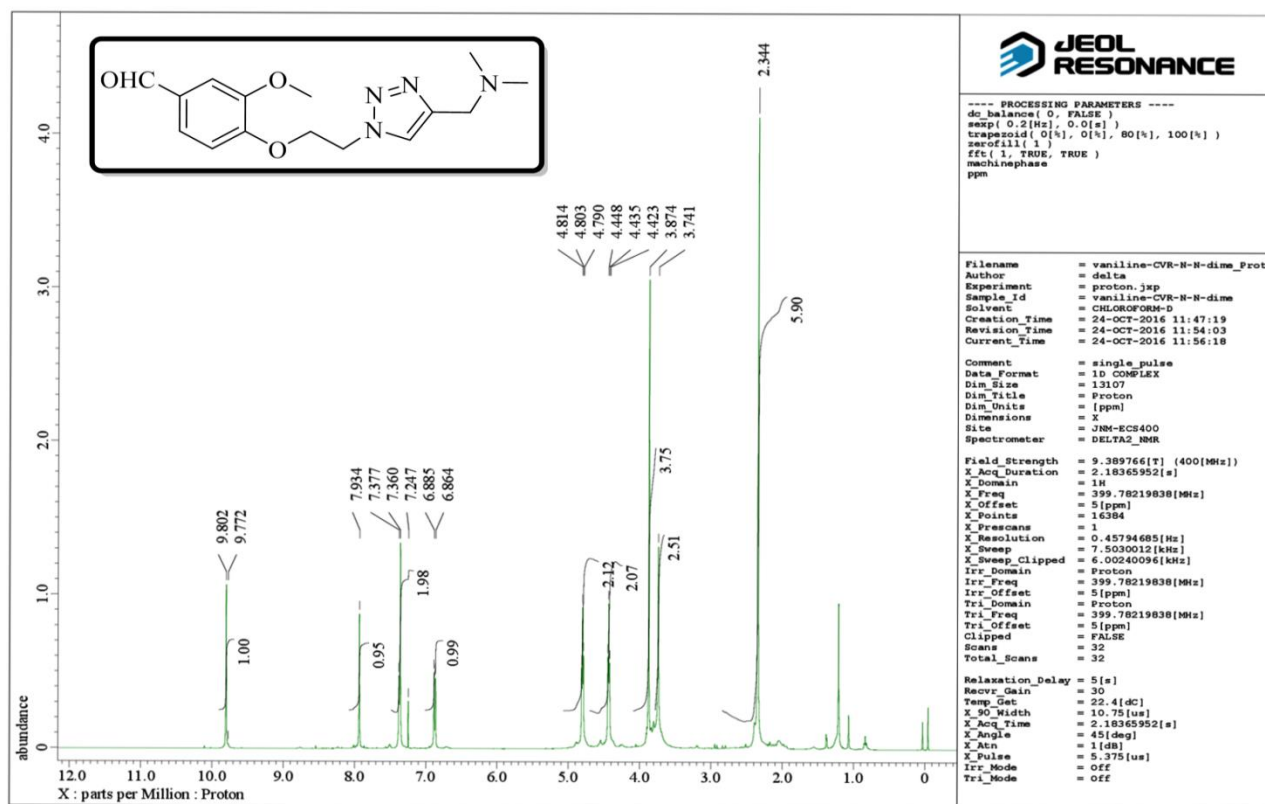

<sup>1</sup>H-NMR spectrum of compound 13i

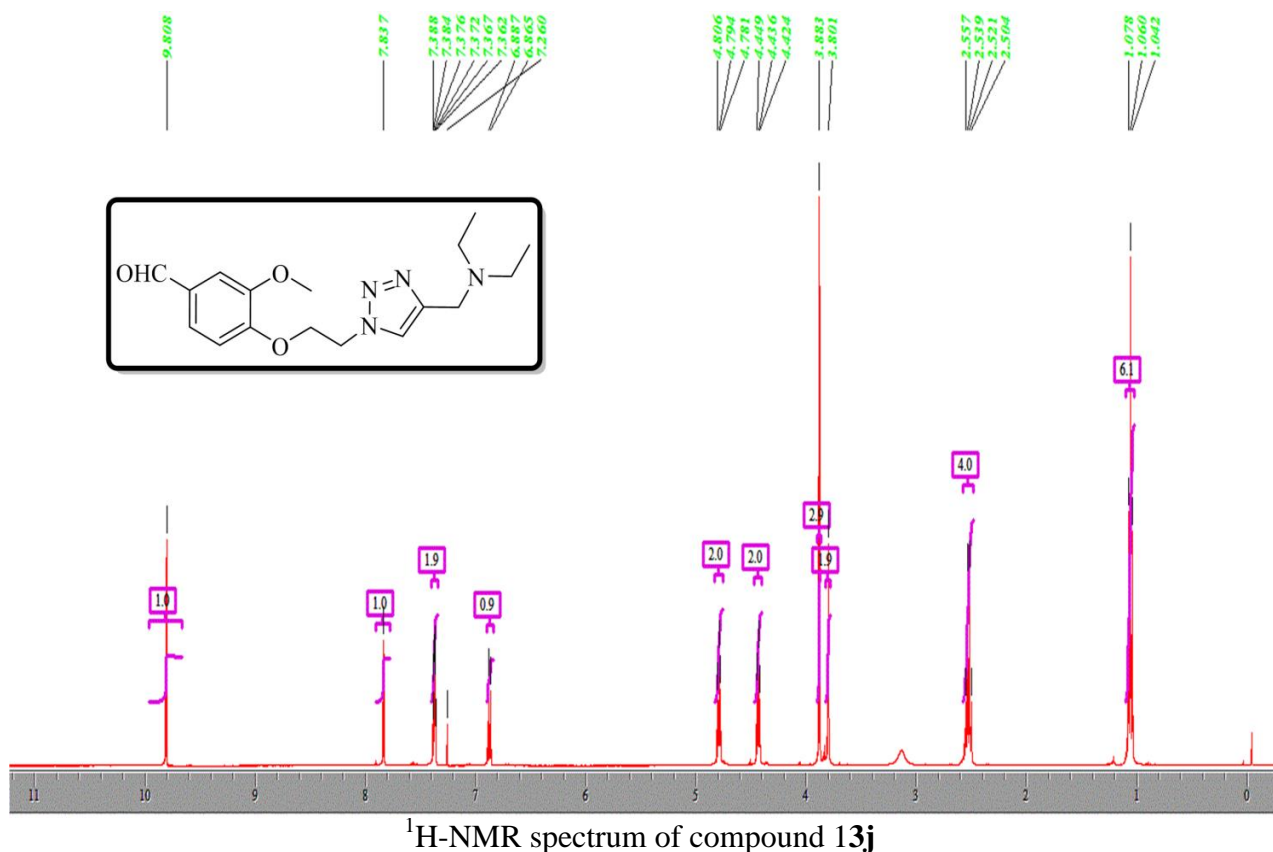

<sup>1</sup>H-NMR spectrum of compound 13j

Sample Name :  
E109832-H2

Solvent: dmsc  
Date: Oct 22 2015  
400 VNMR5/NRM-1/NMR-002

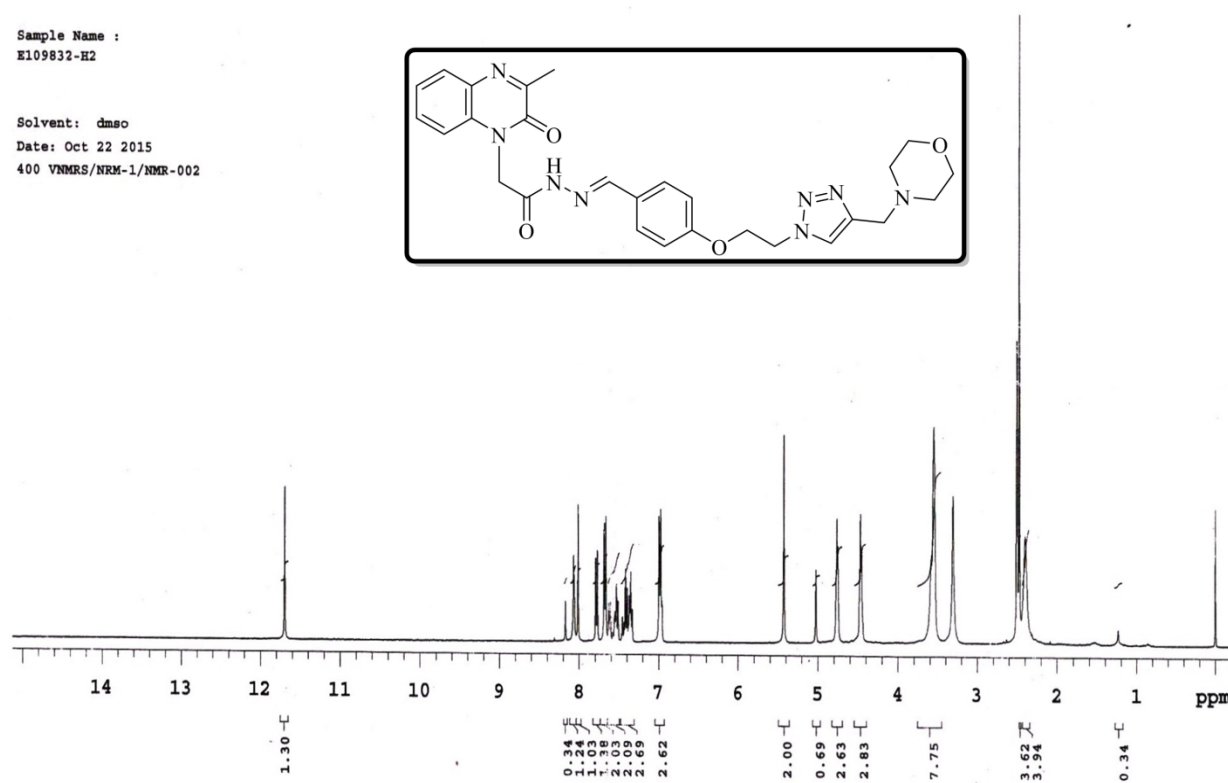

Plotname: 021510C3884\_PROTON\_01\_plot01

<sup>1</sup>H-NMR spectrum of compound **14a**

Solvent: dmsc  
400-MR/NRM-1/NMR-001  
Date: Oct 27 2014

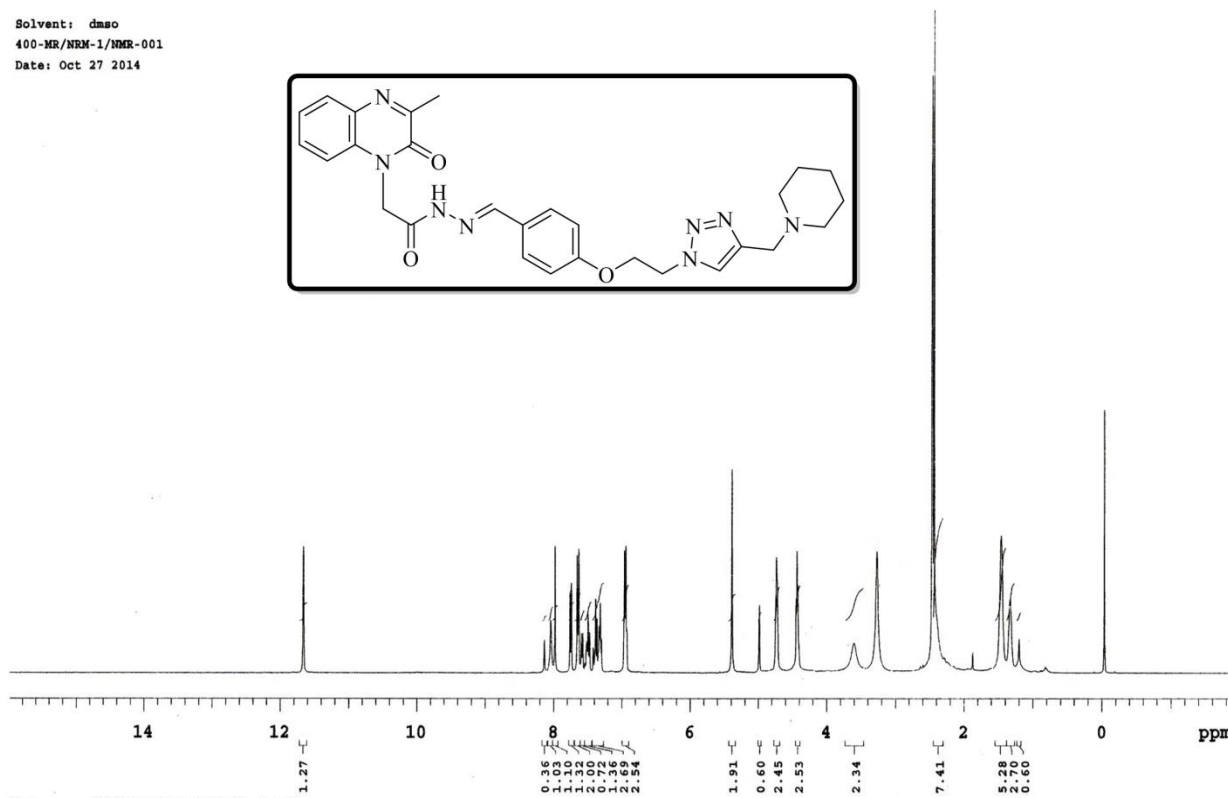

Plotname: 021410C5755\_PROTON\_01\_plot02

<sup>1</sup>H-NMR spectrum of compound **14b**

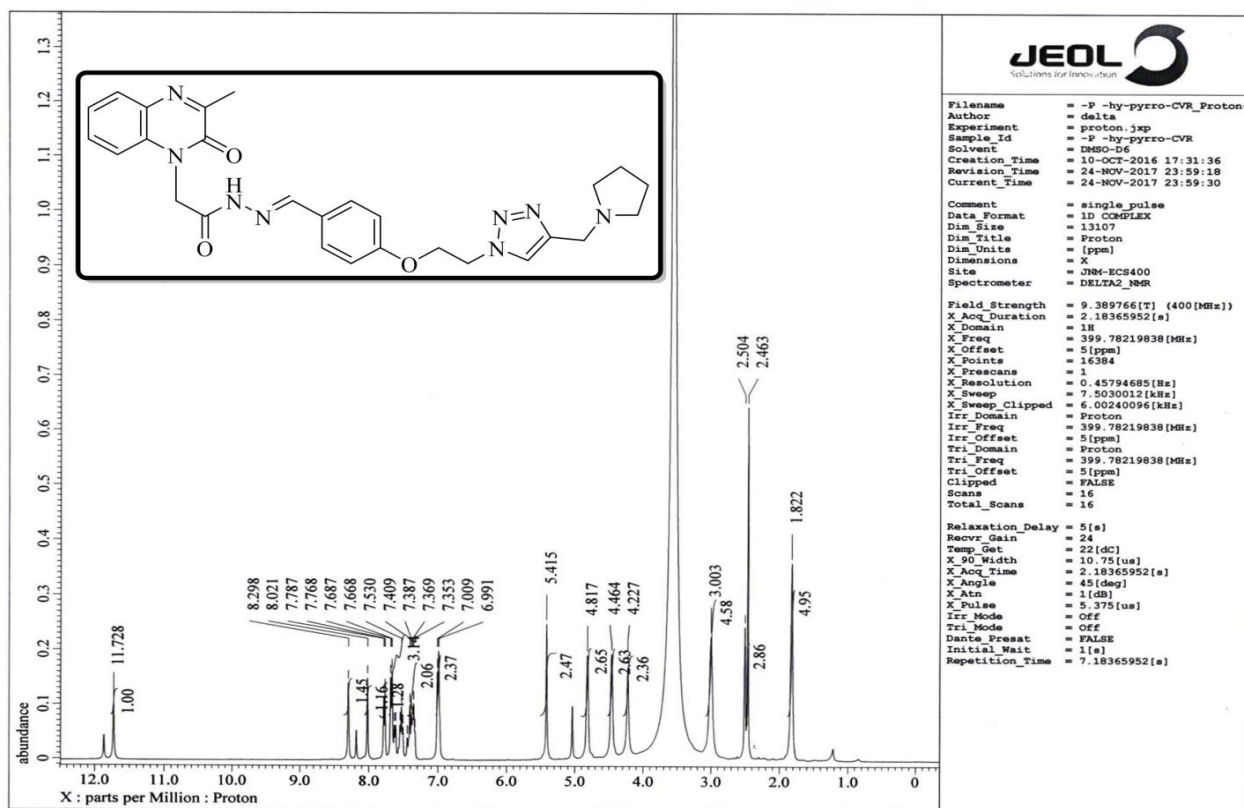

<sup>1</sup>H-NMR spectrum of compound 14c

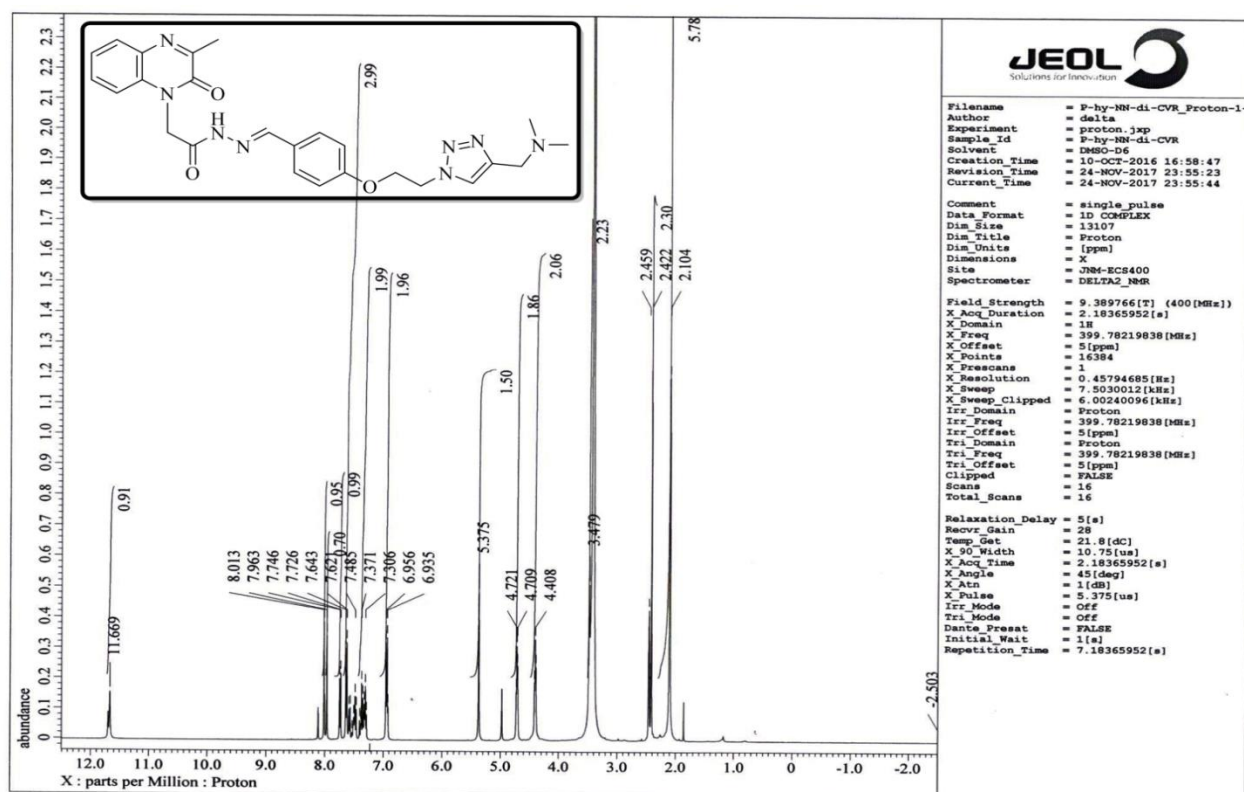

<sup>1</sup>H-NMR spectrum of compound 14d

Sample Name:  
E109832-H3  
Solvent: dmsc  
400 VNMR5/NMR-1/NMR-002  
Temp. 30.0 C / 303.1 K  
Relax. delay 1.000 sec  
Acq. time 4.000 sec  
Pulse 30.0 degrees  
Line broadening 0.5 Hz  
Date: Oct 31 2015

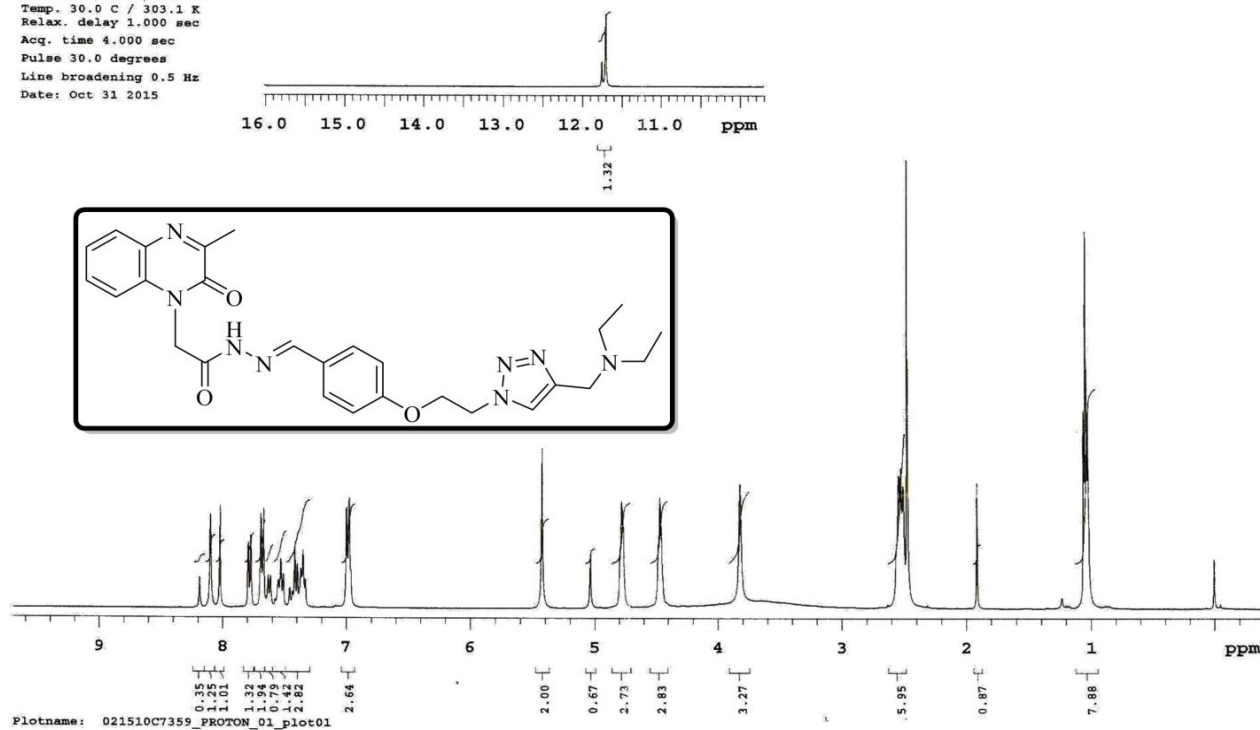

<sup>1</sup>H-NMR spectrum of compound **14e**

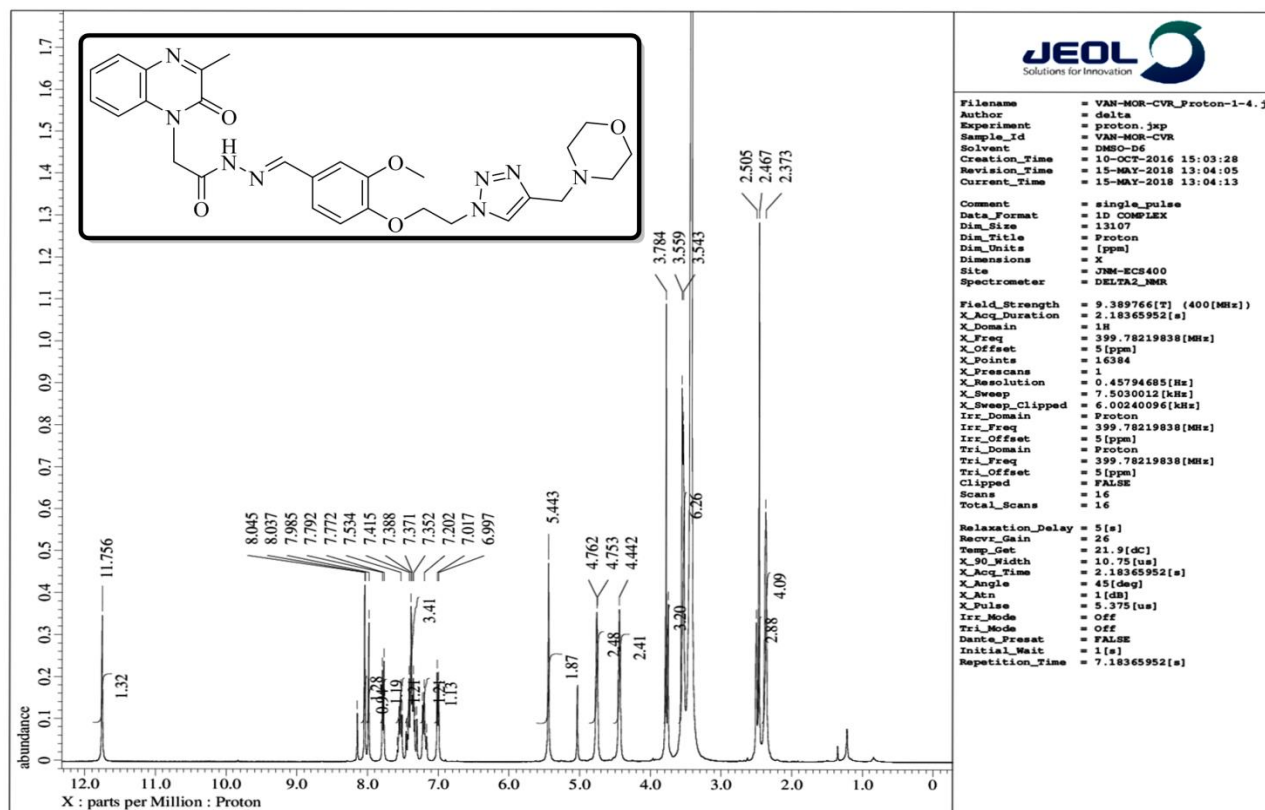

<sup>1</sup>H-NMR spectrum of compound **14f**



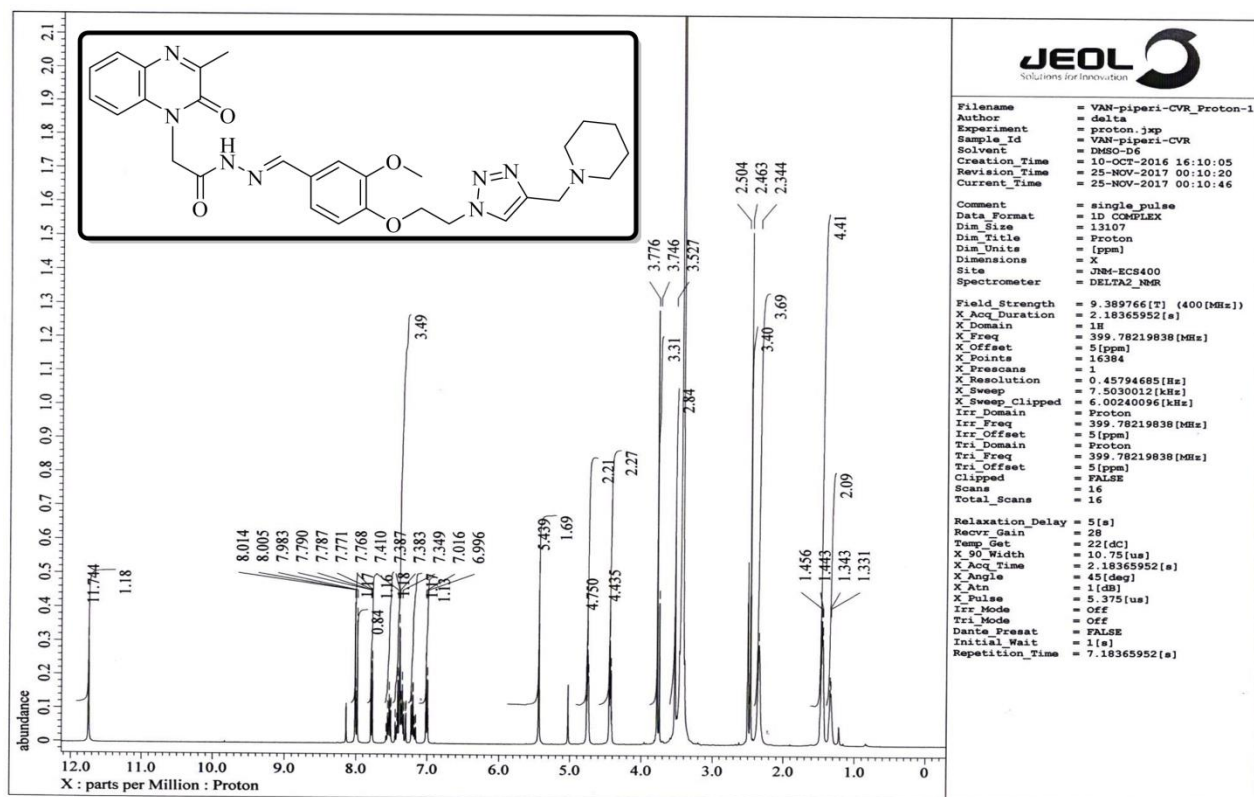

<sup>1</sup>H-NMR spectrum of compound **14g**

Sample Name :  
E109832-H9  
Solvent: dmsc  
Date: Oct 21 2015  
400 VNMR5/NMR-1/NMR-002

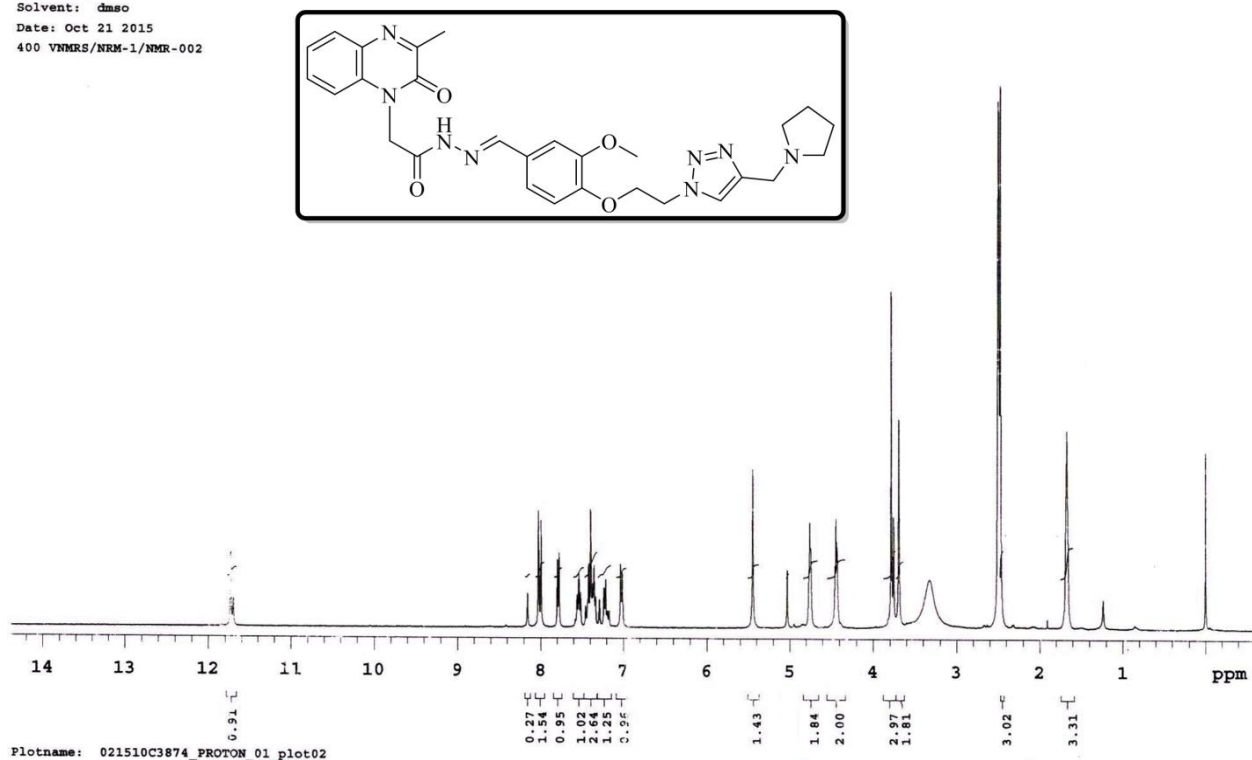

<sup>1</sup>H-NMR spectrum of compound **14h**



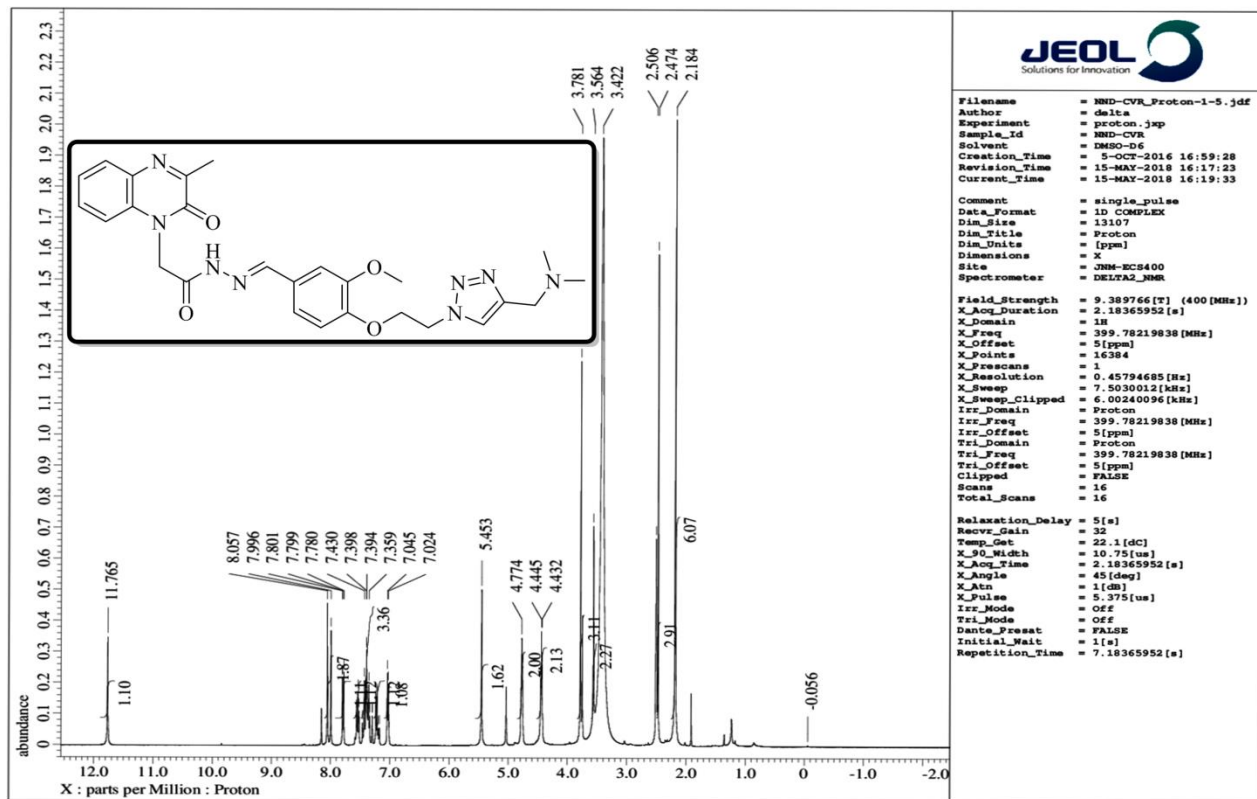

<sup>1</sup>H-NMR spectrum of compound **14i**

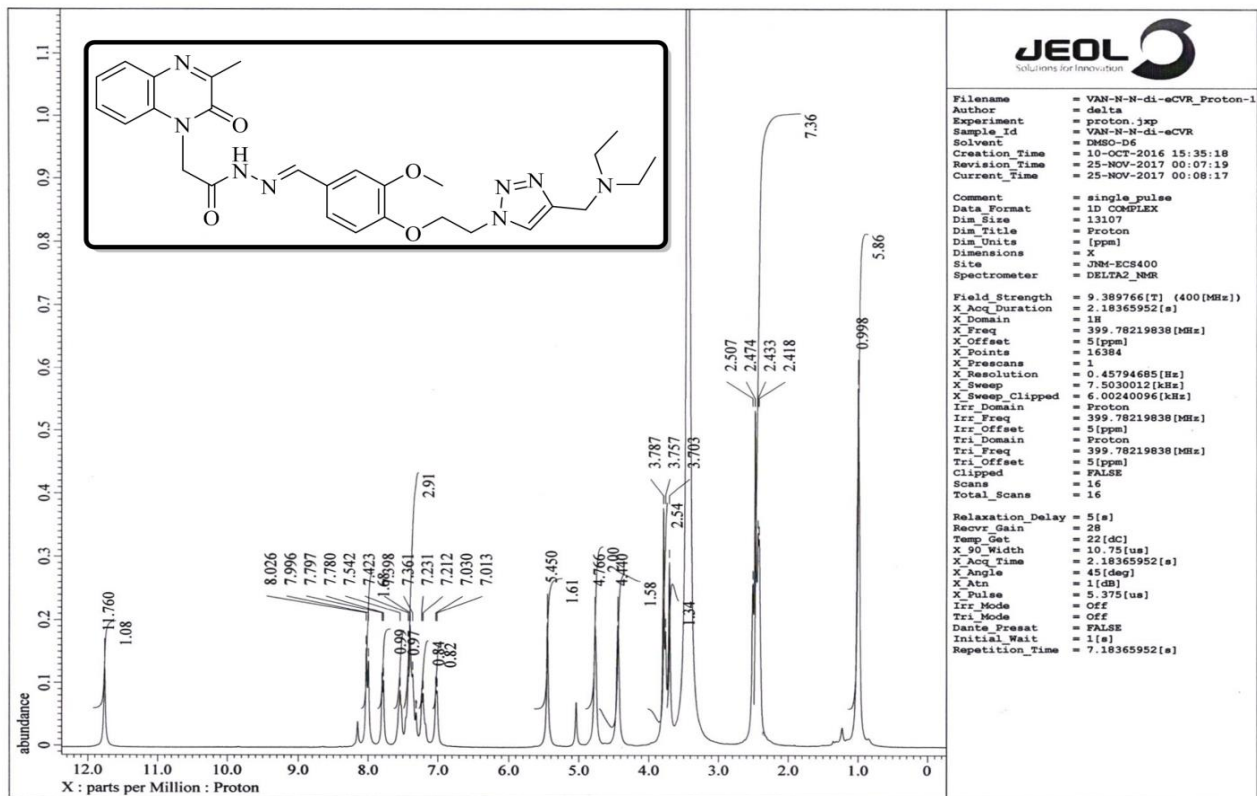

<sup>1</sup>H-NMR spectrum of compound **14j**

Solvent: dmsc  
400-MR/NRM-1/NMR-001  
Date: Oct 27 2014

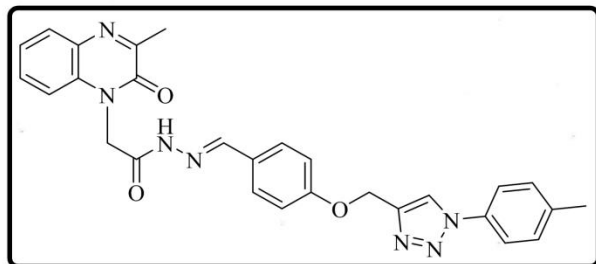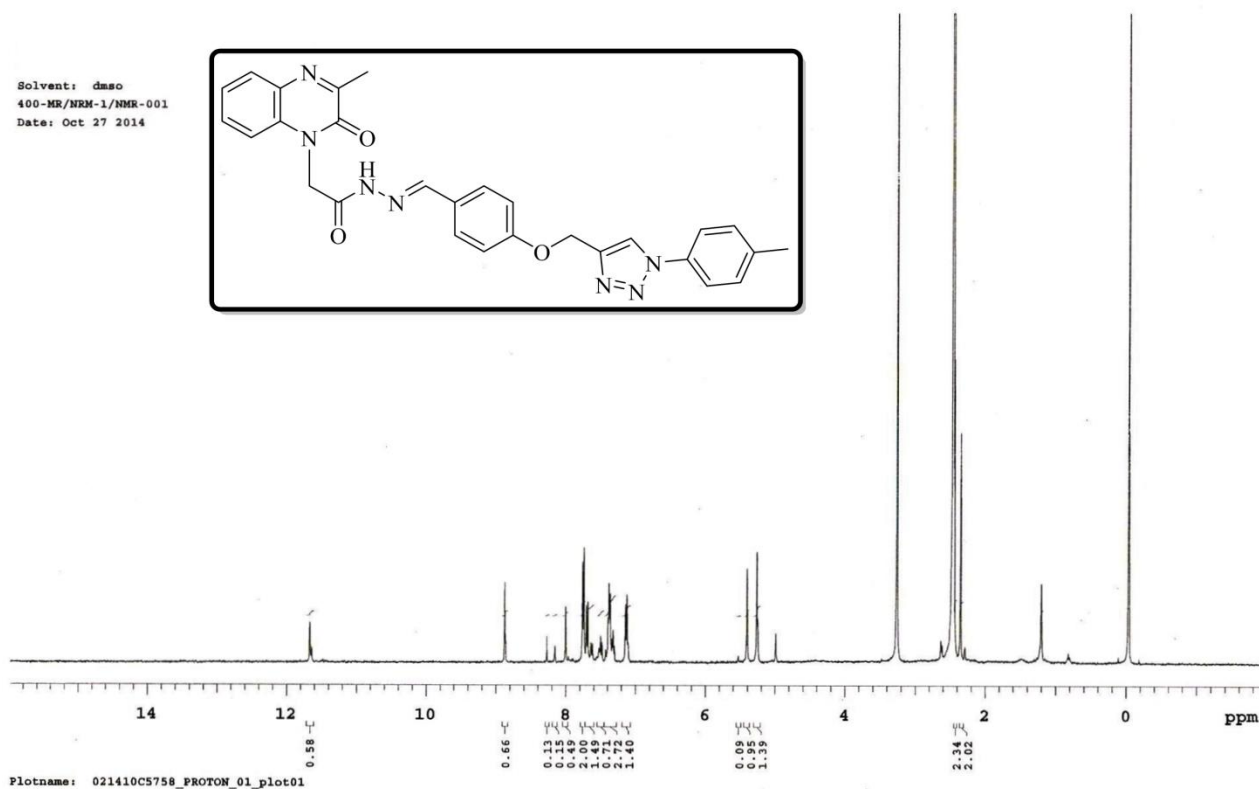

<sup>1</sup>H-NMR spectrum of compound **15a**

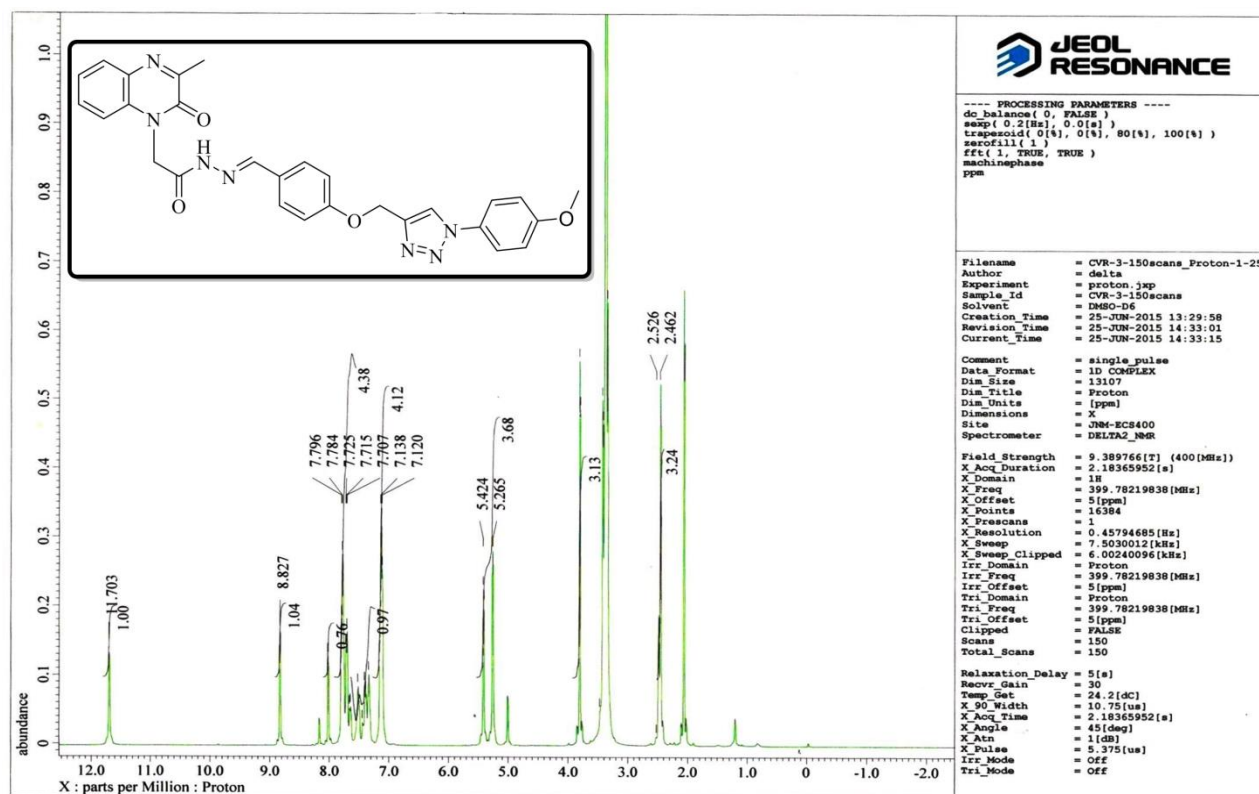

<sup>1</sup>H-NMR spectrum of compound **15b**

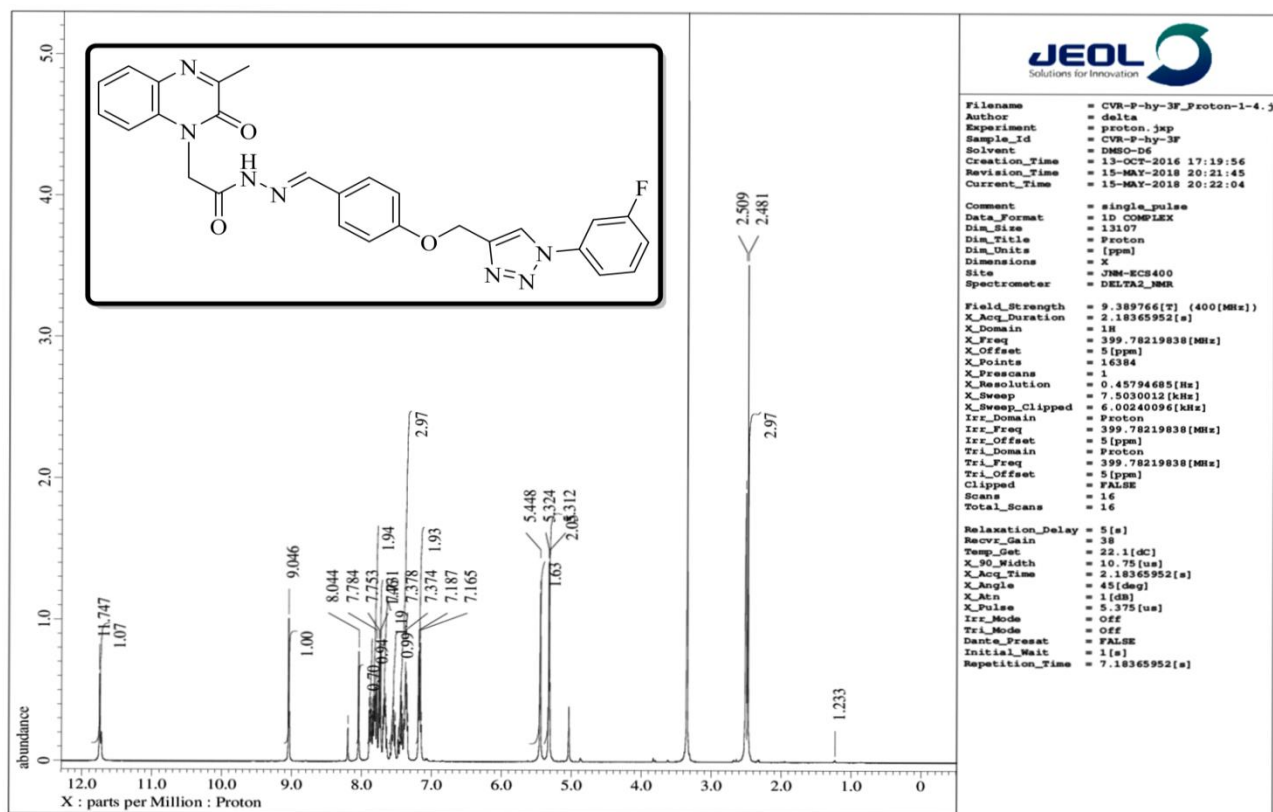

<sup>1</sup>H-NMR spectrum of compound 15c

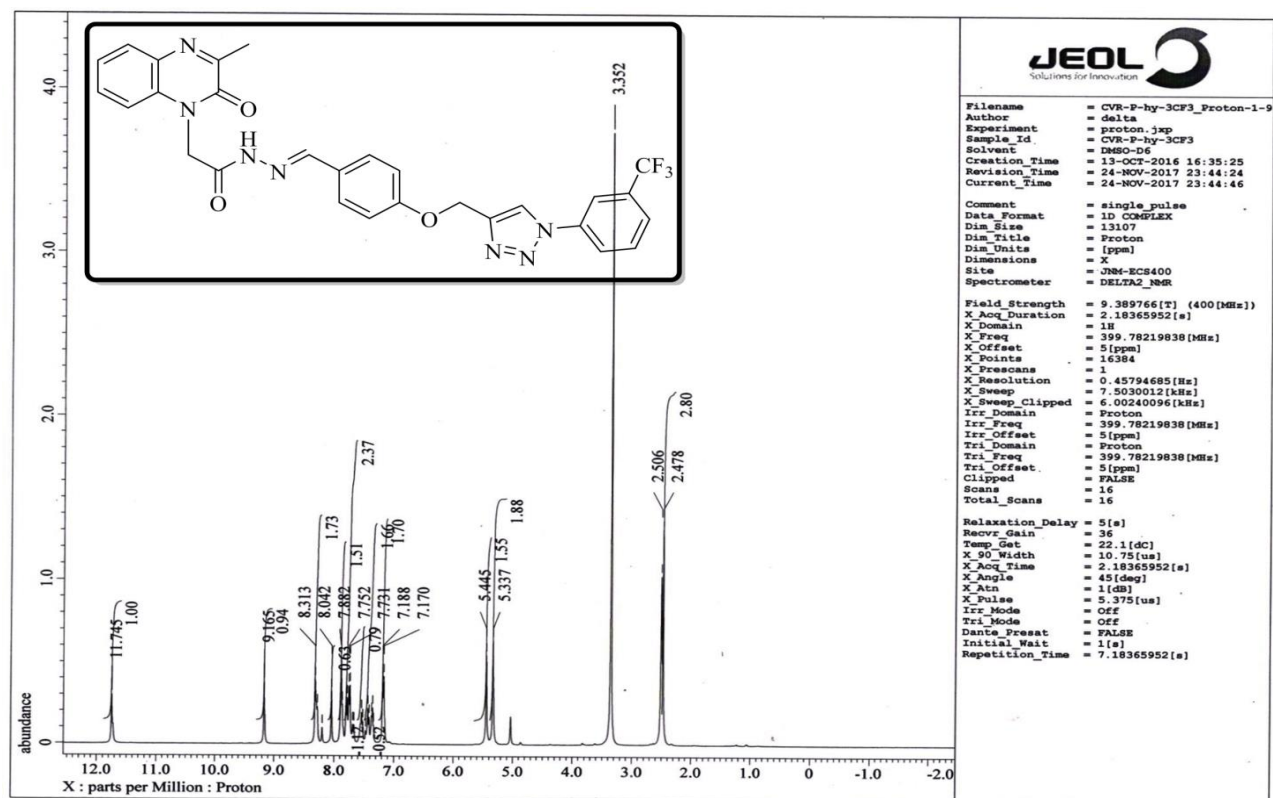

<sup>1</sup>H-NMR spectrum of compound 15d

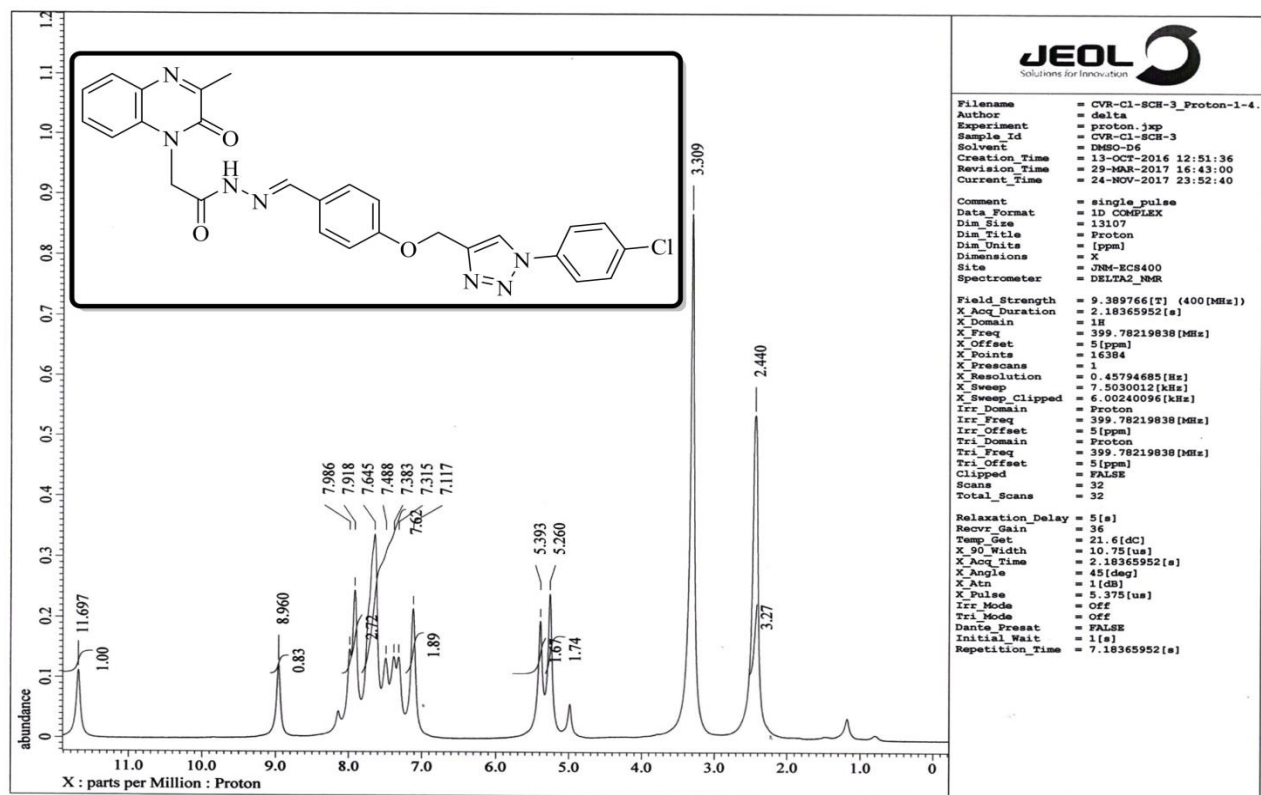

<sup>1</sup>H-NMR spectrum of compound 15e

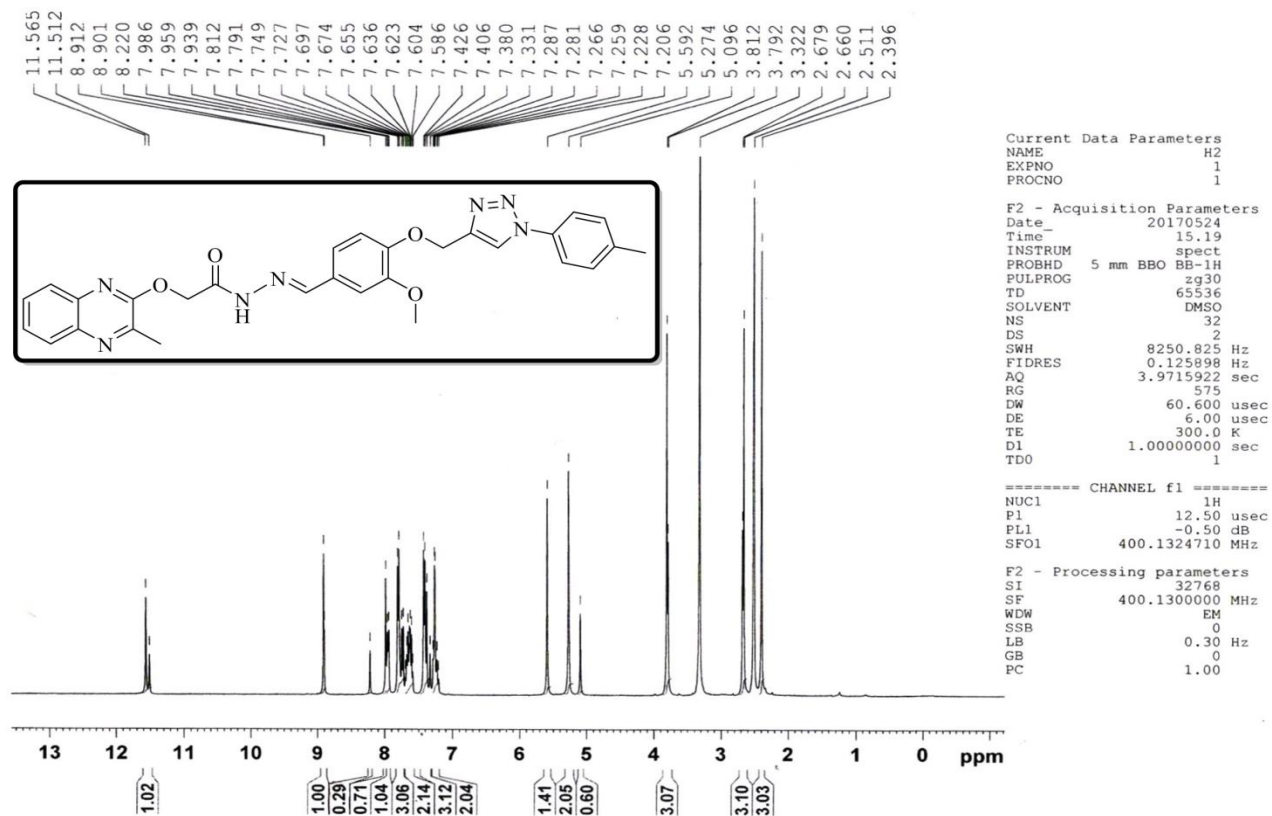

<sup>1</sup>H-NMR spectrum of compound 16a



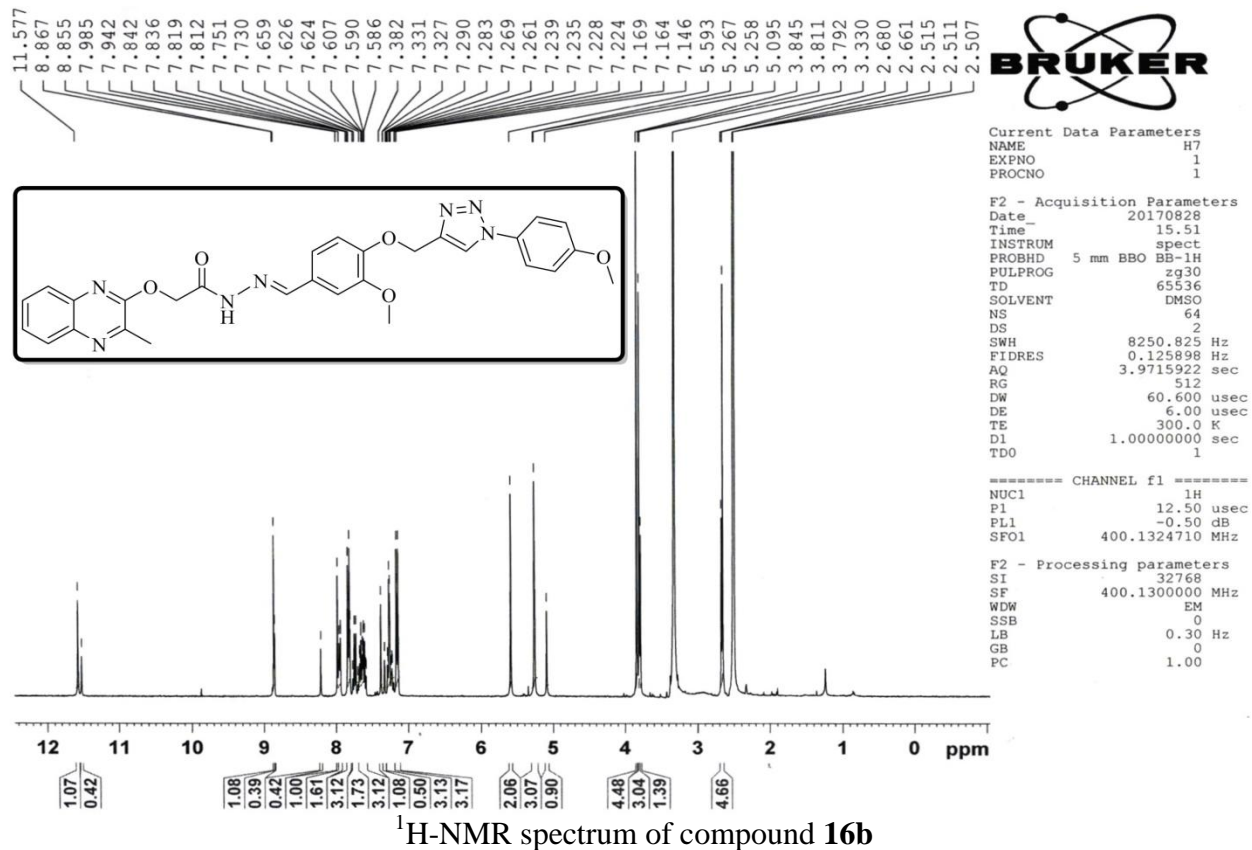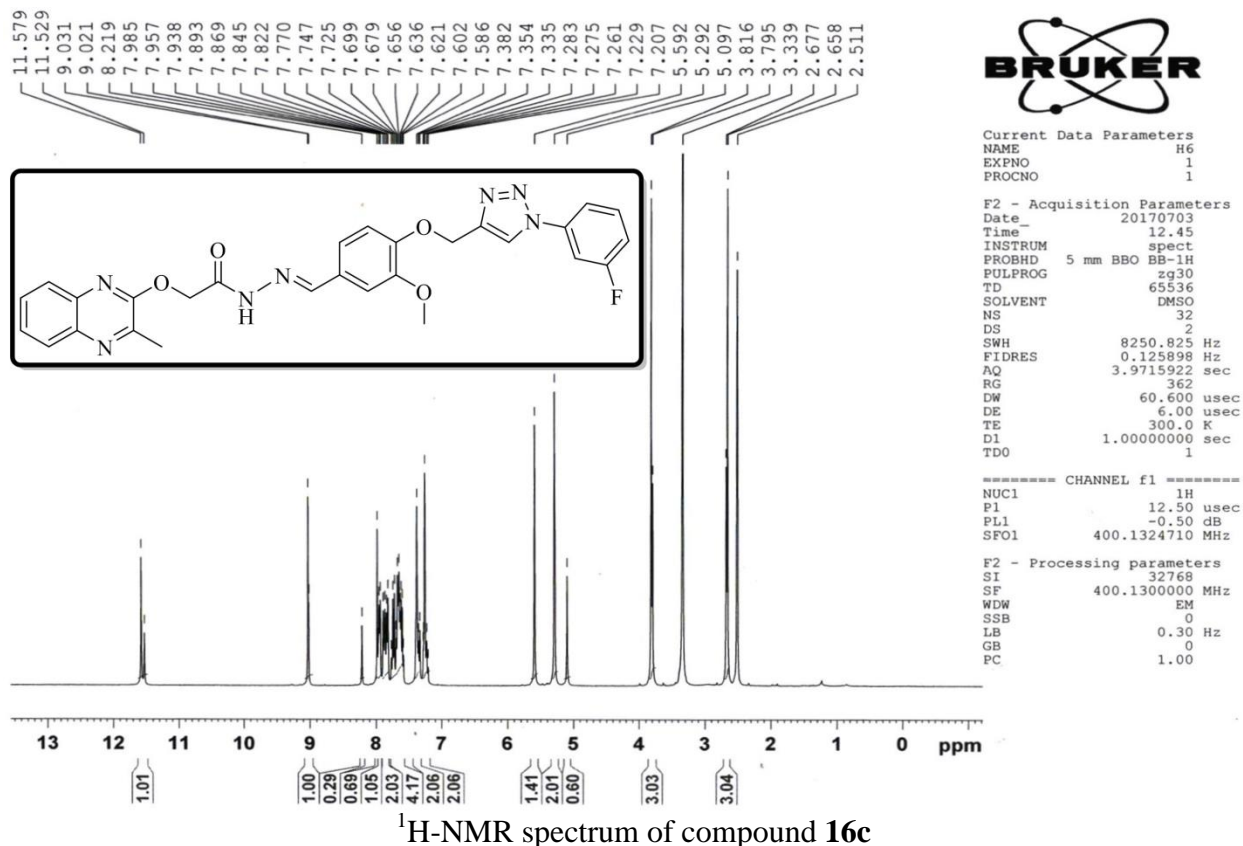

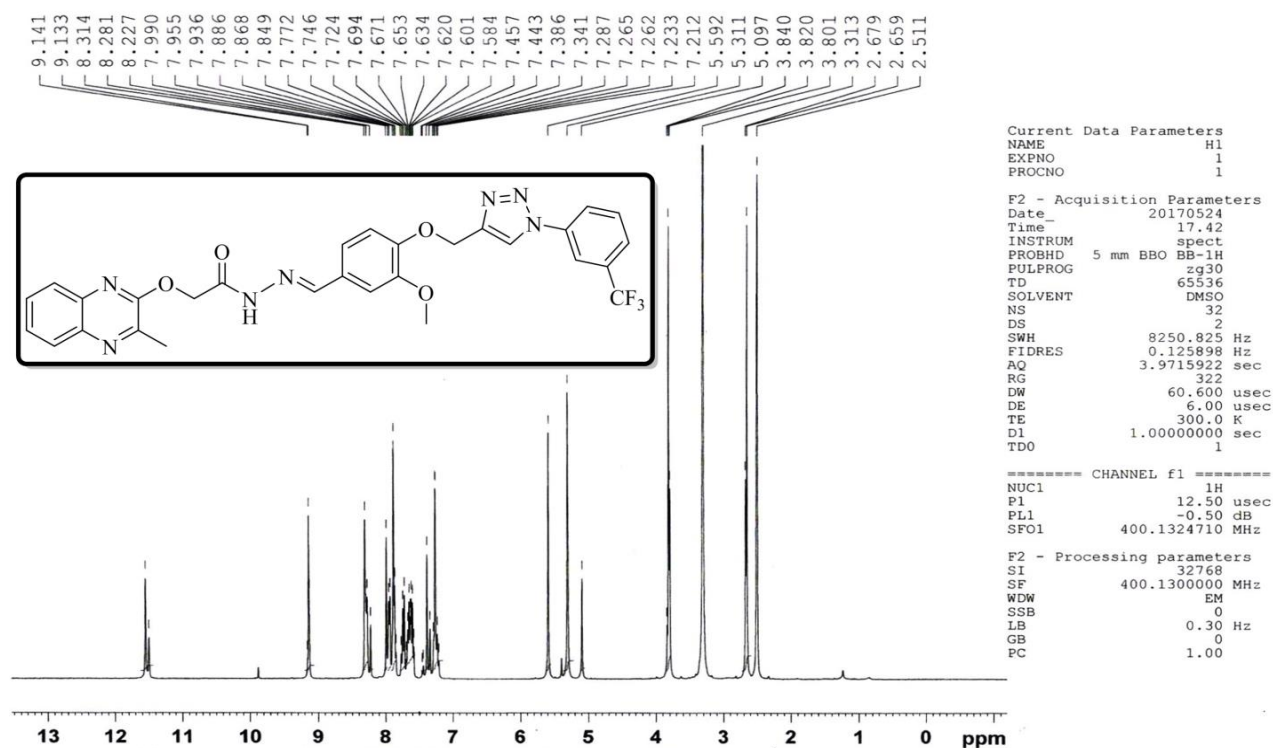

<sup>1</sup>H-NMR spectrum of compound **16d**

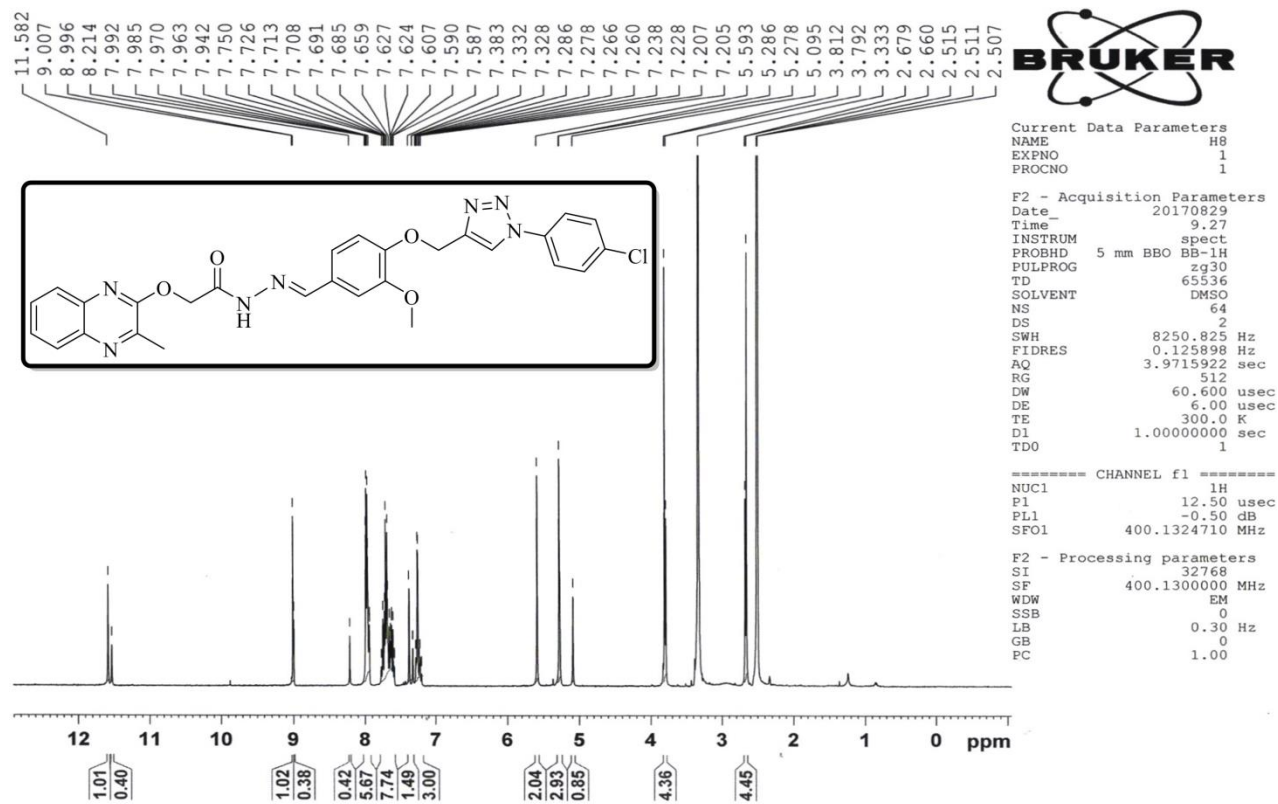

<sup>1</sup>H-NMR spectrum of compound **16e**



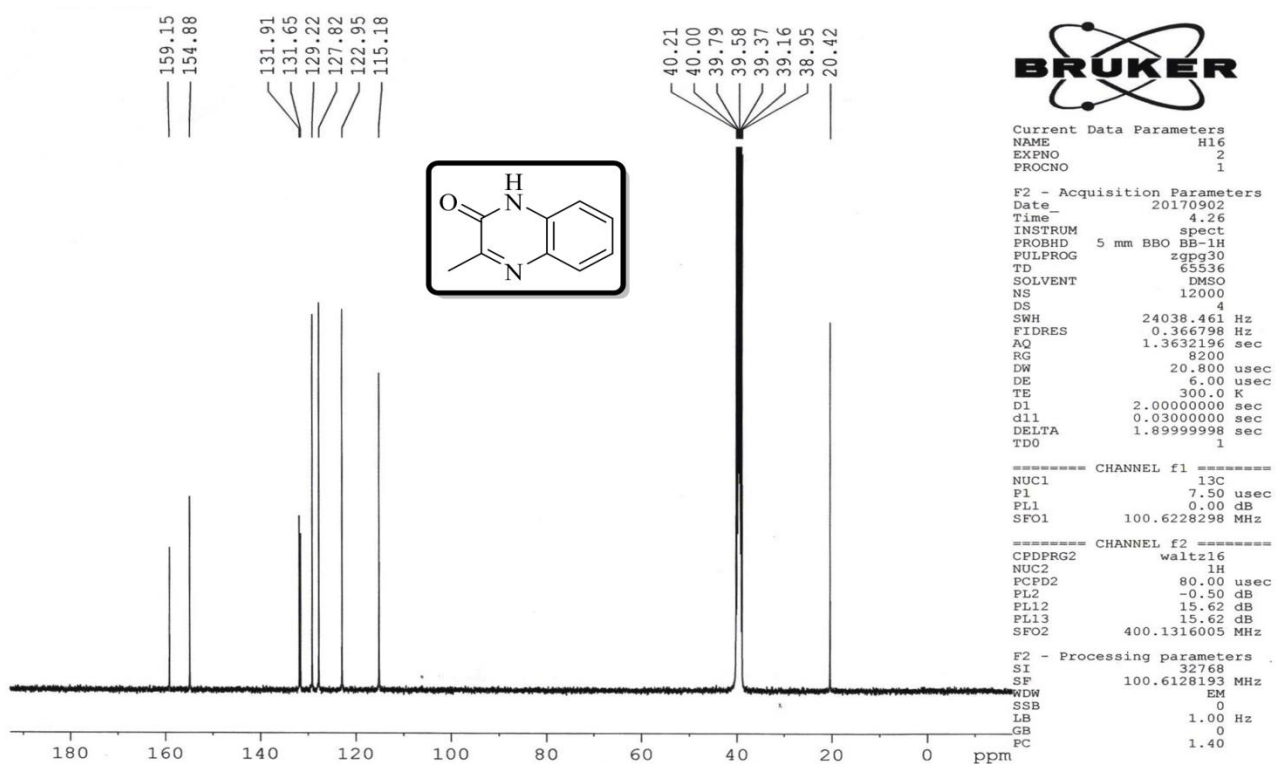

$^{13}\text{C}$ -NMR spectrum of compound 1

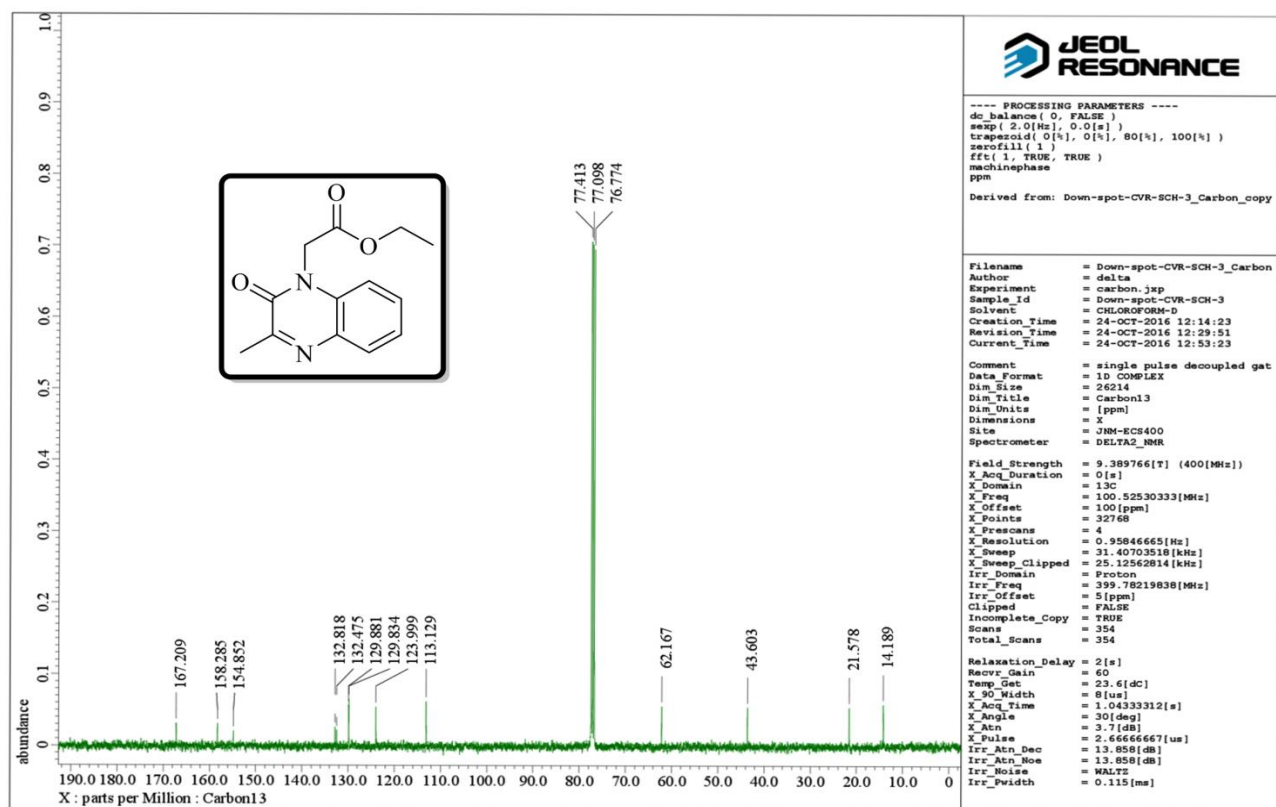

$^{13}\text{C}$ -NMR spectrum of compound 2

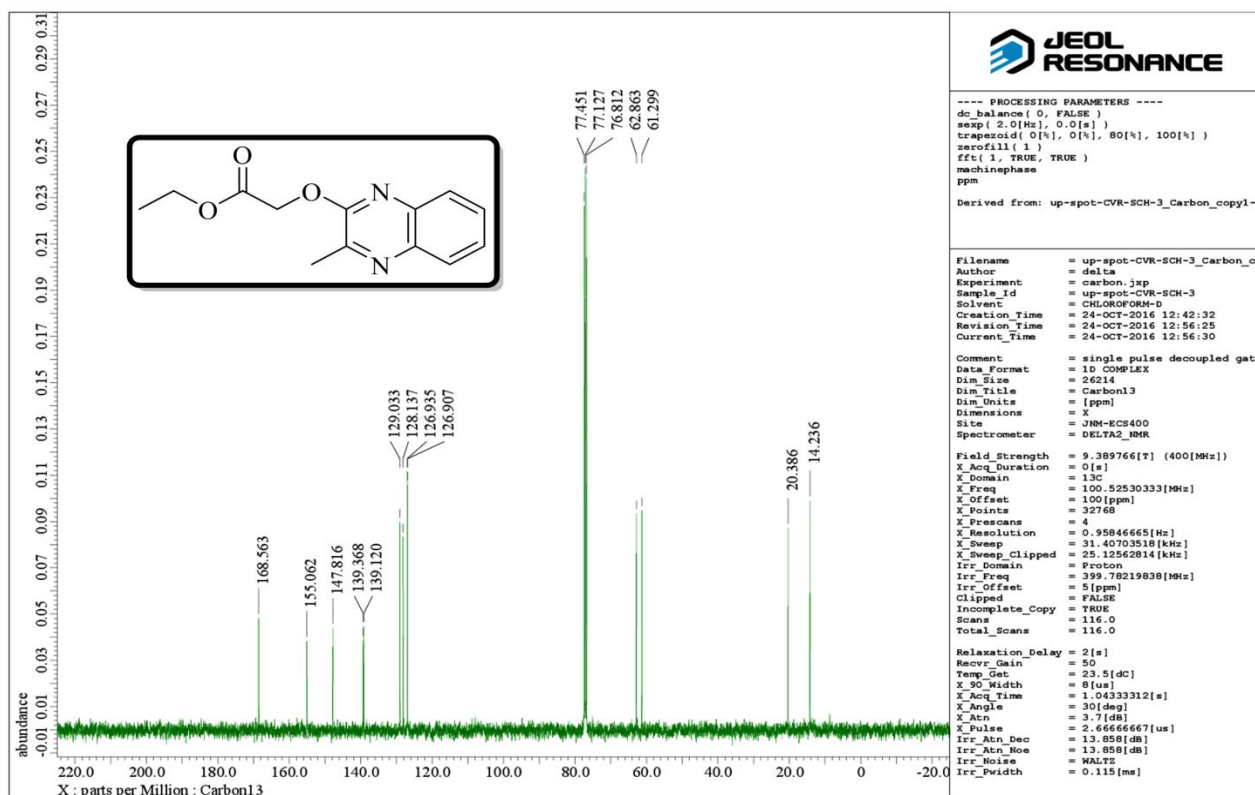

<sup>13</sup>C-NMR spectrum of compound 2a

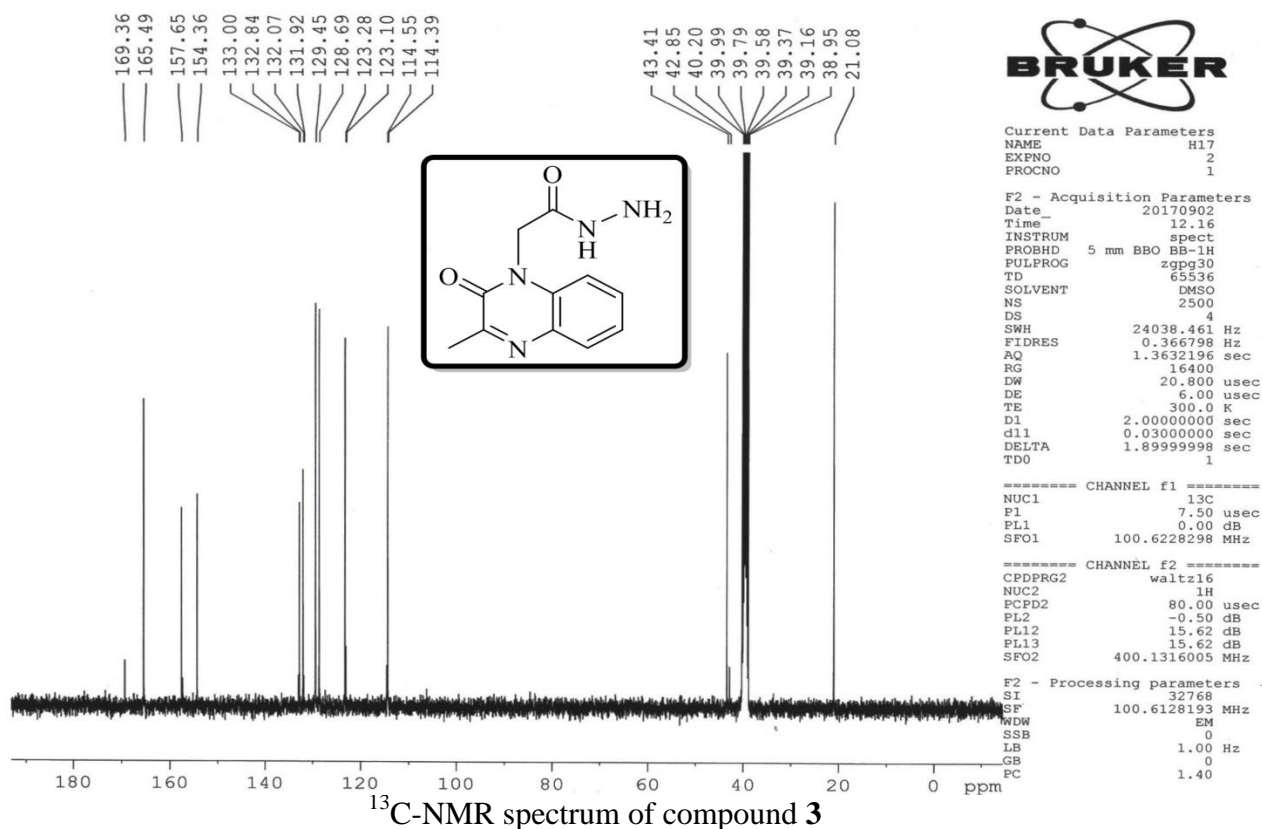

<sup>13</sup>C-NMR spectrum of compound 3

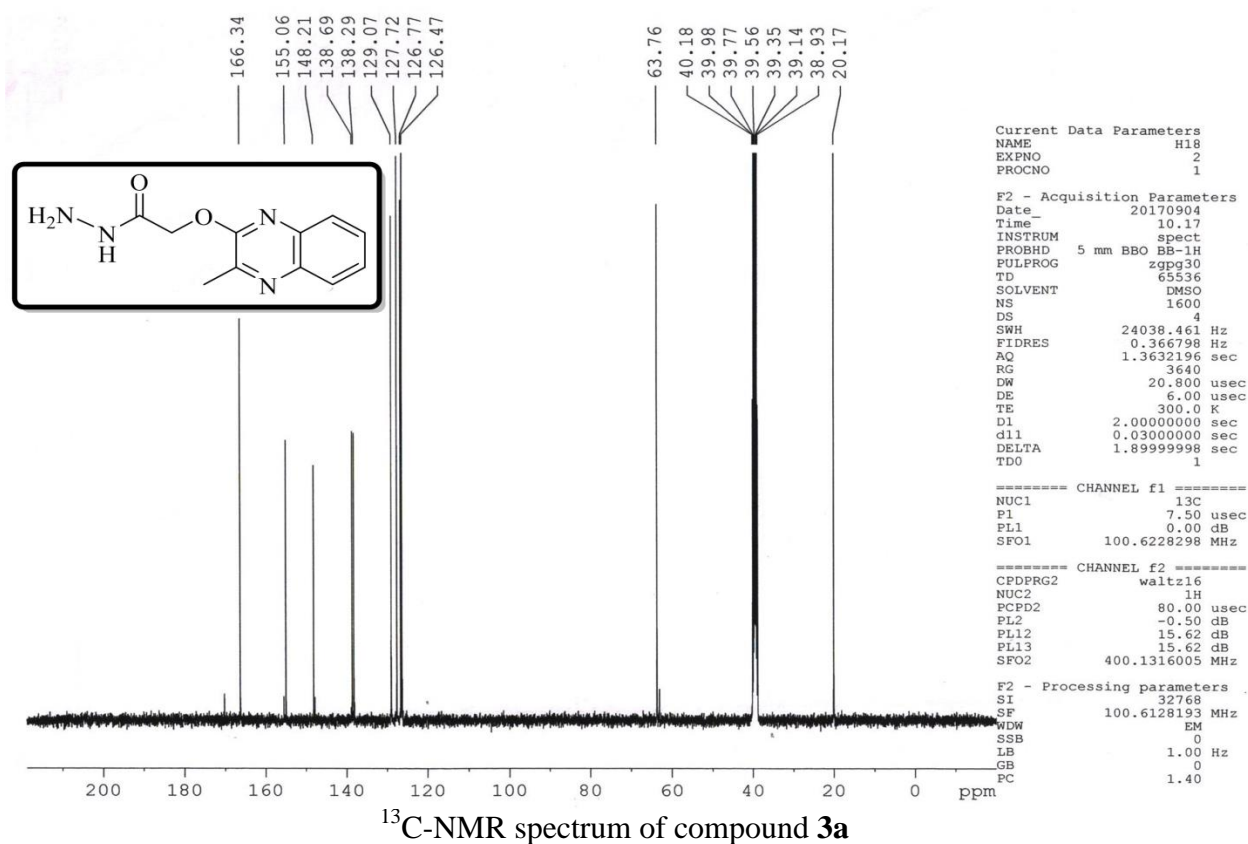

<sup>13</sup>C-NMR spectrum of compound 3a

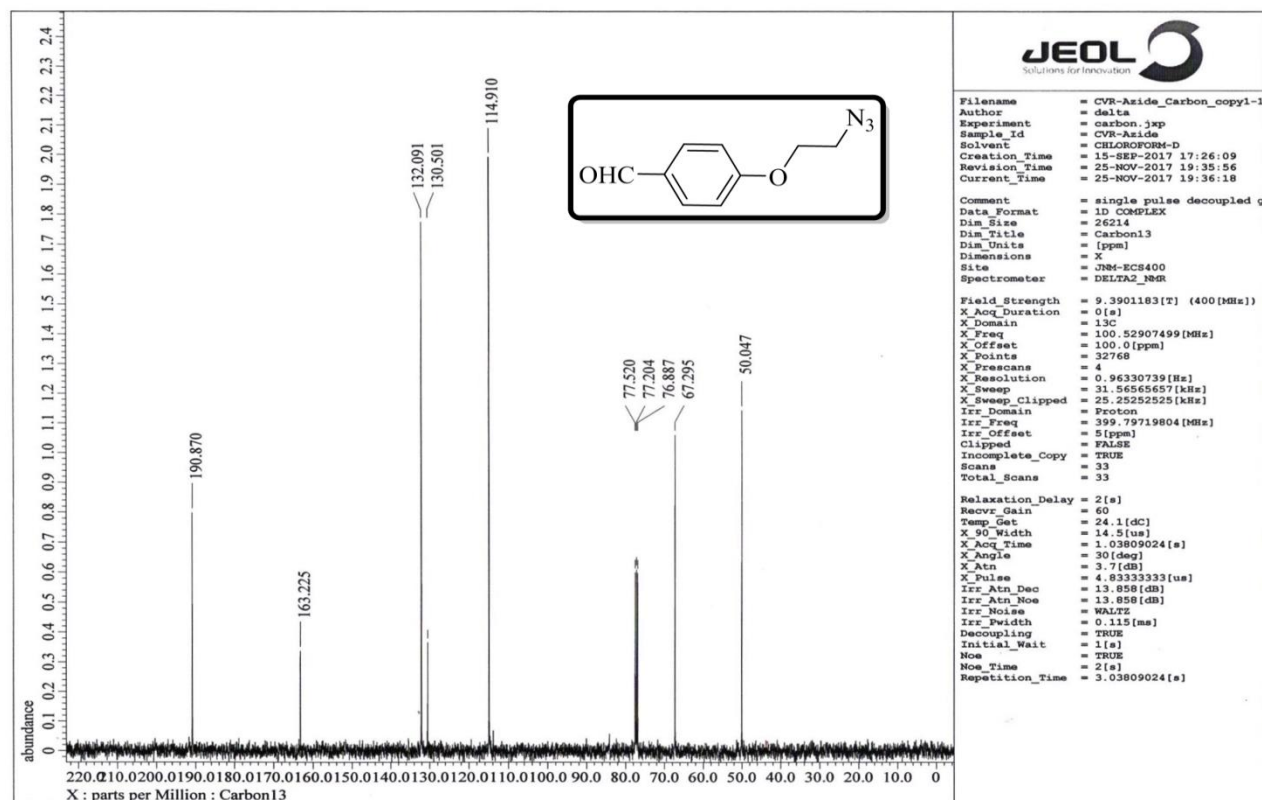

<sup>13</sup>C-NMR spectrum of compound 11

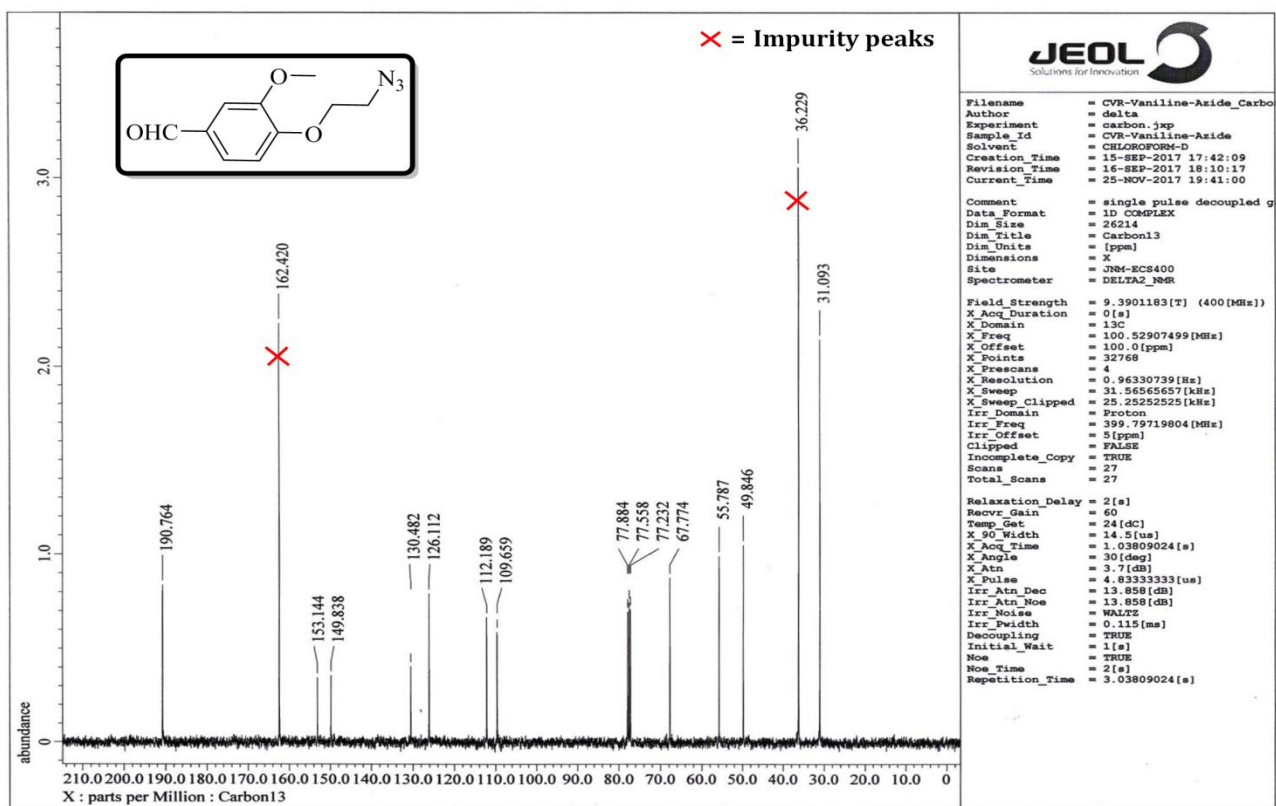

<sup>13</sup>C-NMR spectrum of compound 12

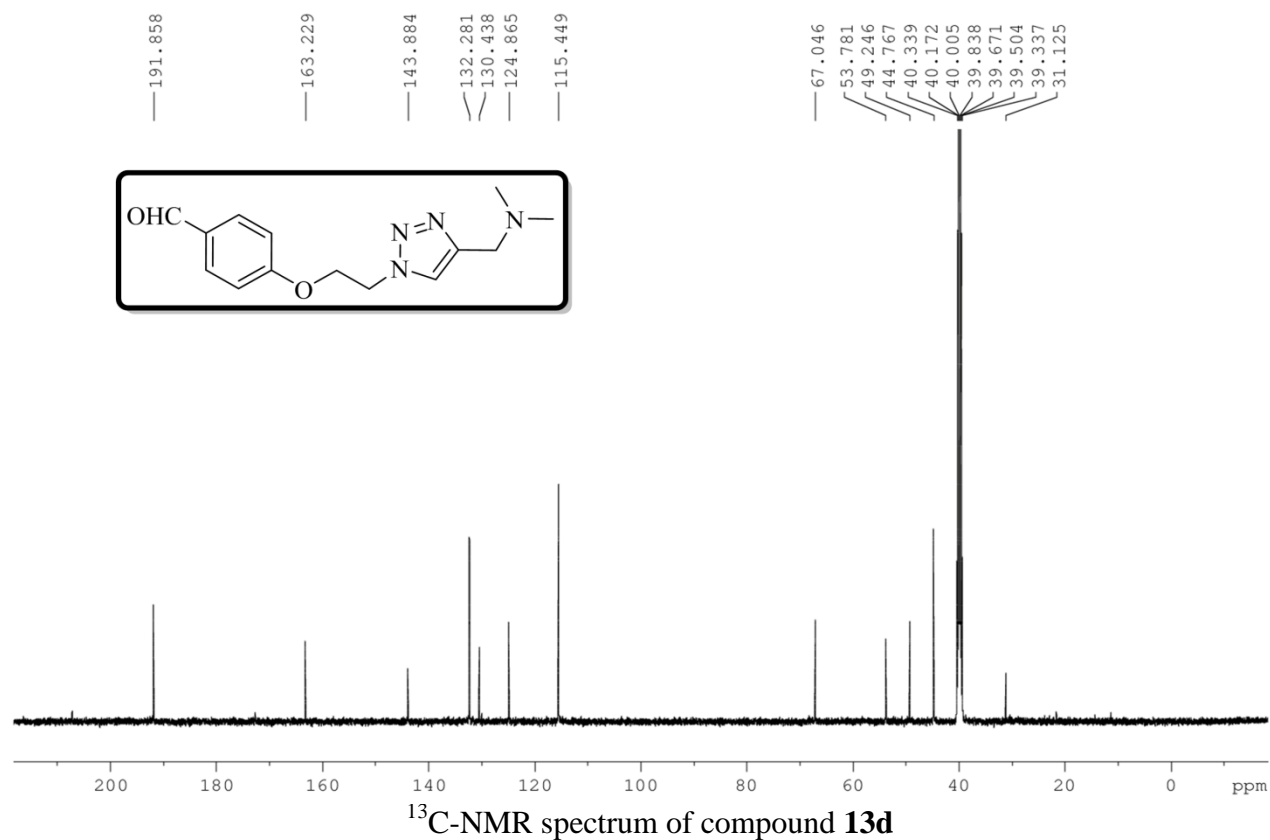

<sup>13</sup>C-NMR spectrum of compound 13d

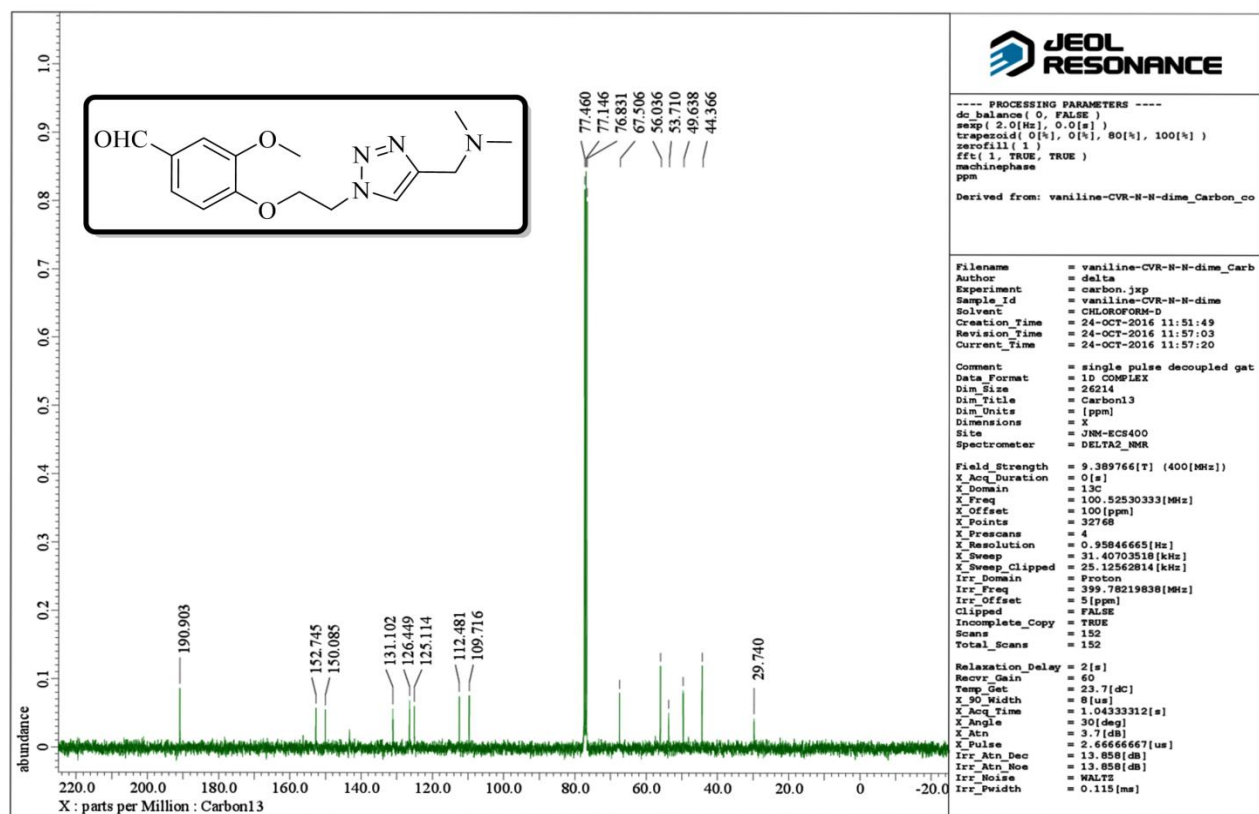

<sup>13</sup>C-NMR spectrum of compound **13i**

Sample Name :  
 E109832-H2  
 Solvent: dmsc  
 VNMR5-400/PPM-1/VNMR-002  
 Date: Oct 22 2015

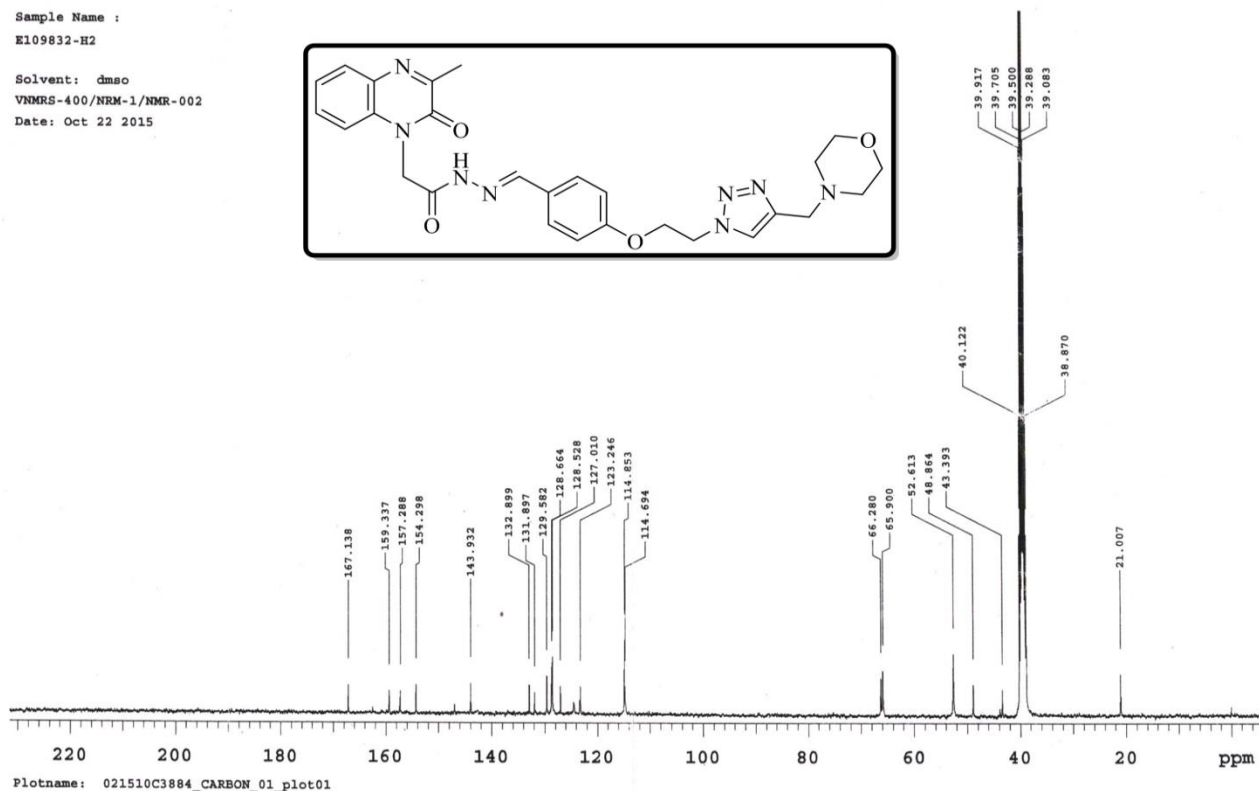

<sup>13</sup>C-NMR spectrum of compound **14a**



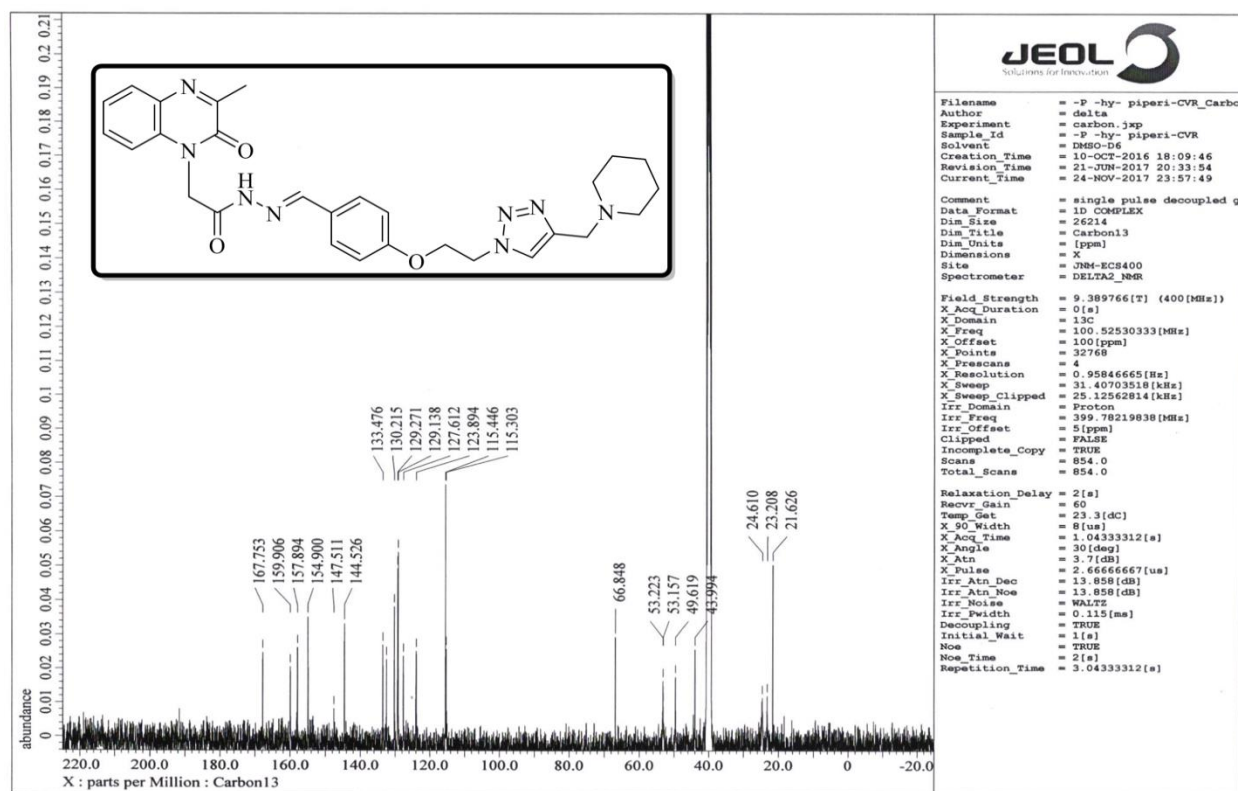

<sup>13</sup>C-NMR spectrum of compound 14b

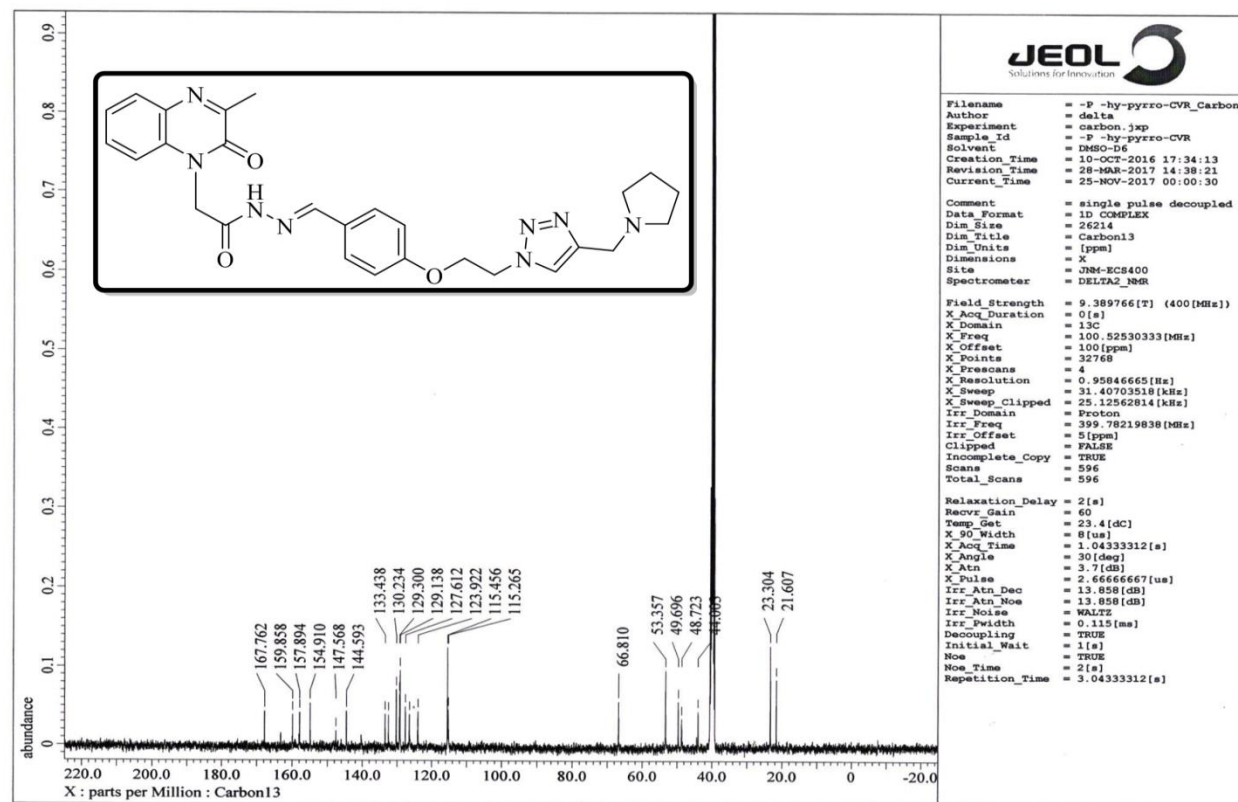

<sup>13</sup>C-NMR spectrum of compound 14c



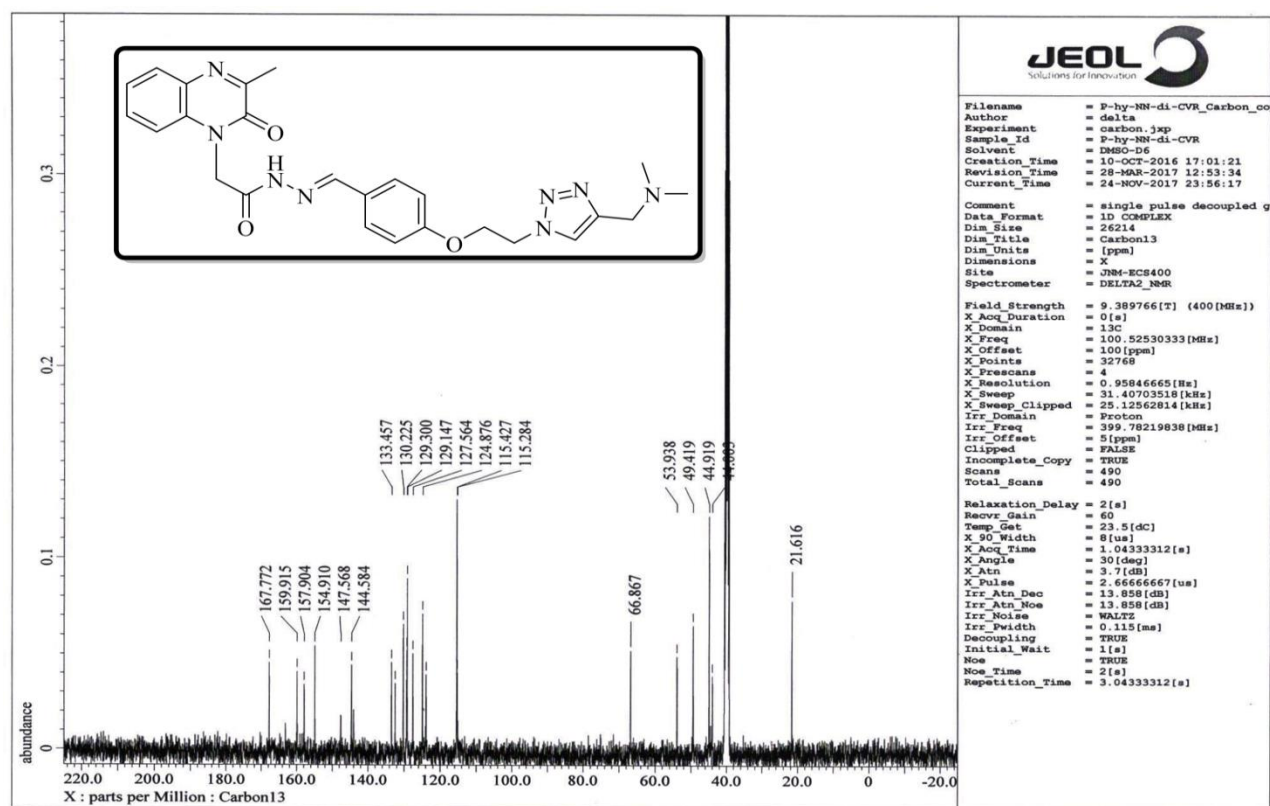

<sup>13</sup>C-NMR spectrum of compound **14d**

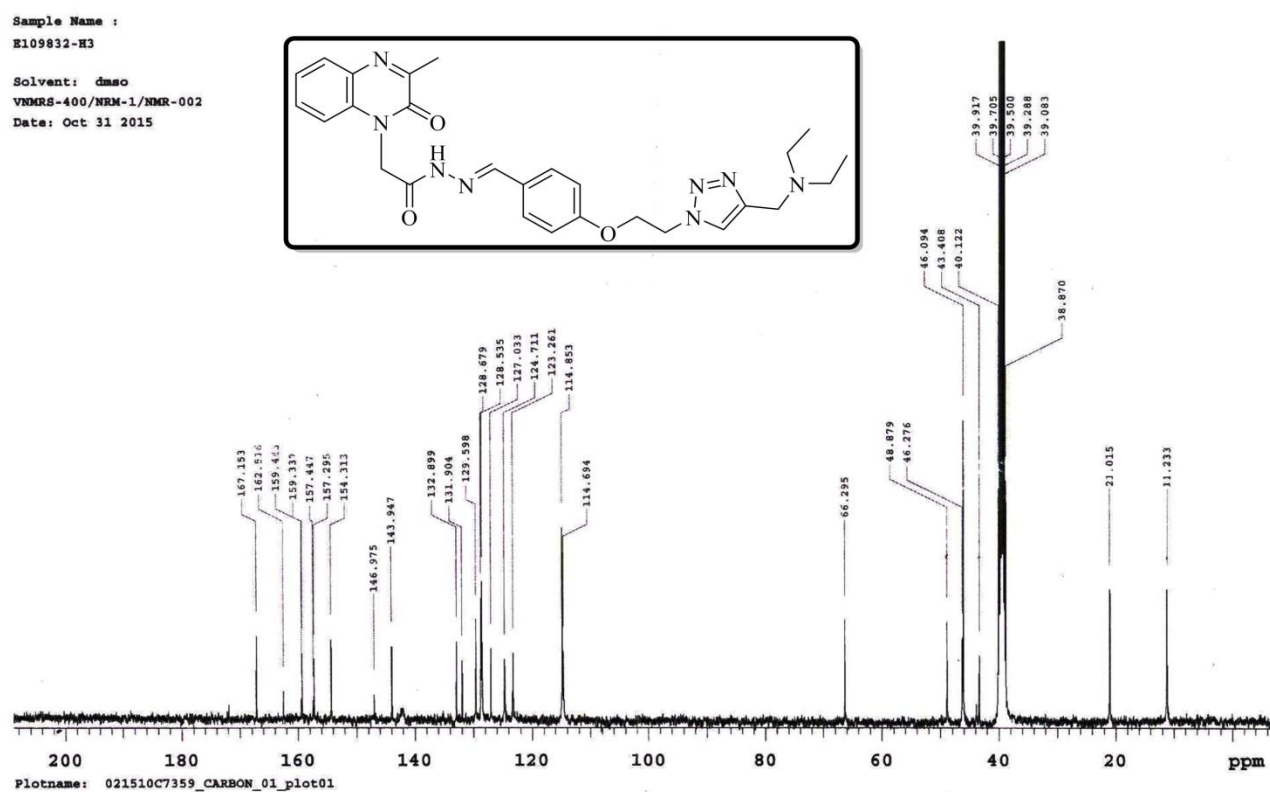

<sup>13</sup>C-NMR spectrum of compound **14e**

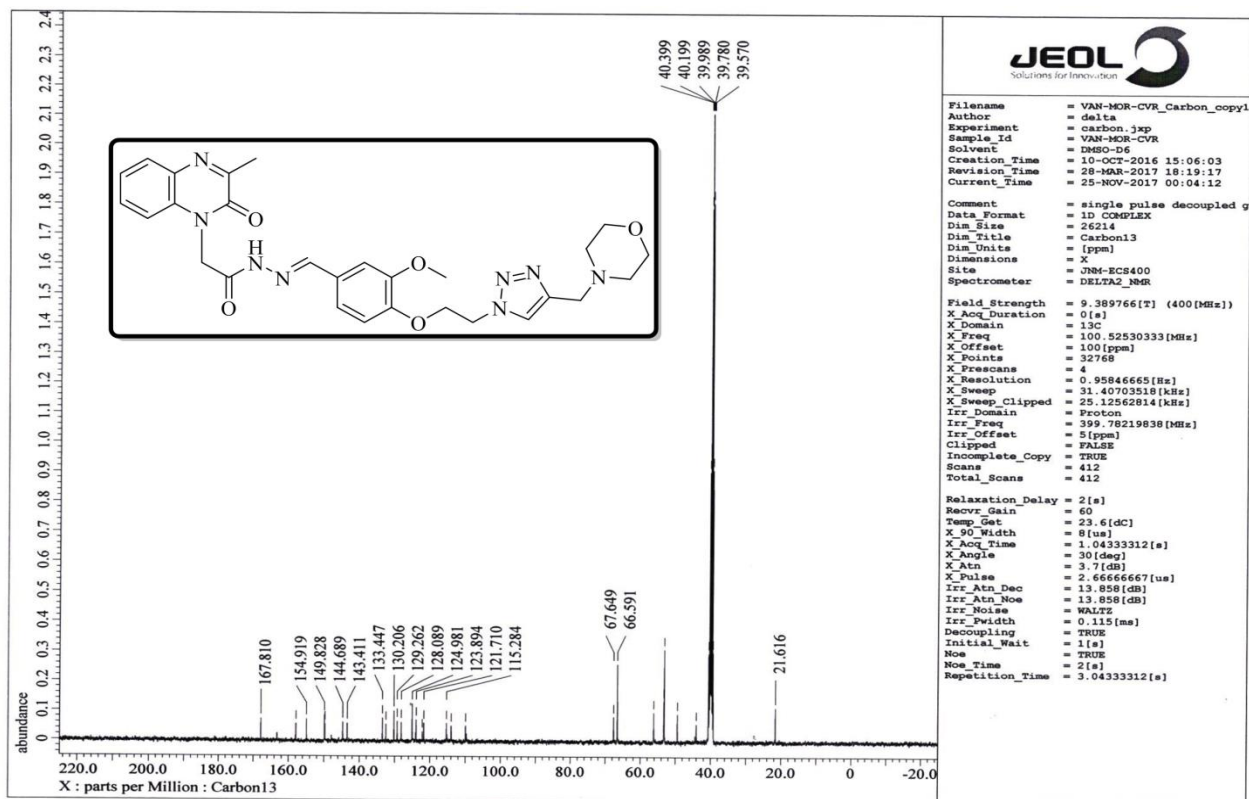

<sup>13</sup>C-NMR spectrum of compound **14f**

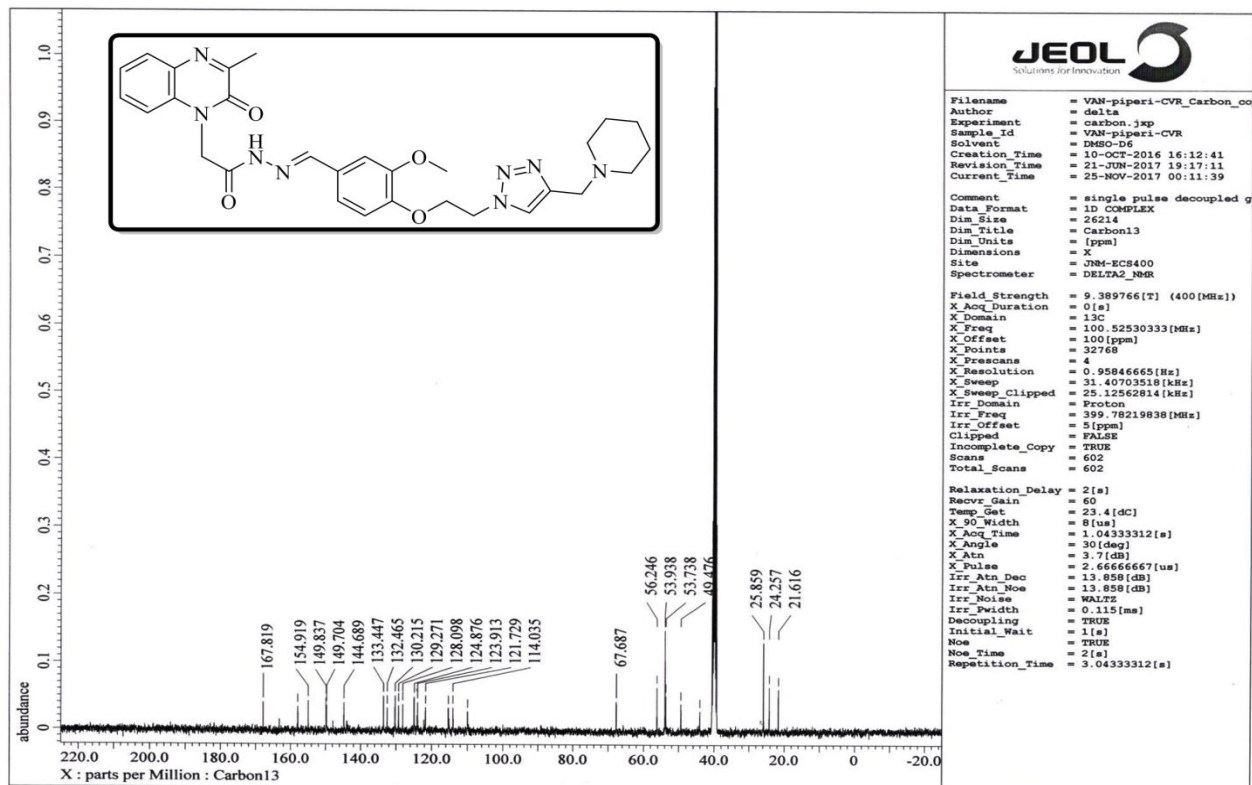

<sup>13</sup>C-NMR spectrum of compound **14g**

Sample Name :  
E109832-H9  
Solvent: dmsc  
VNMR5-400/NRM-1/NMR-002  
Date: Oct 21 2015

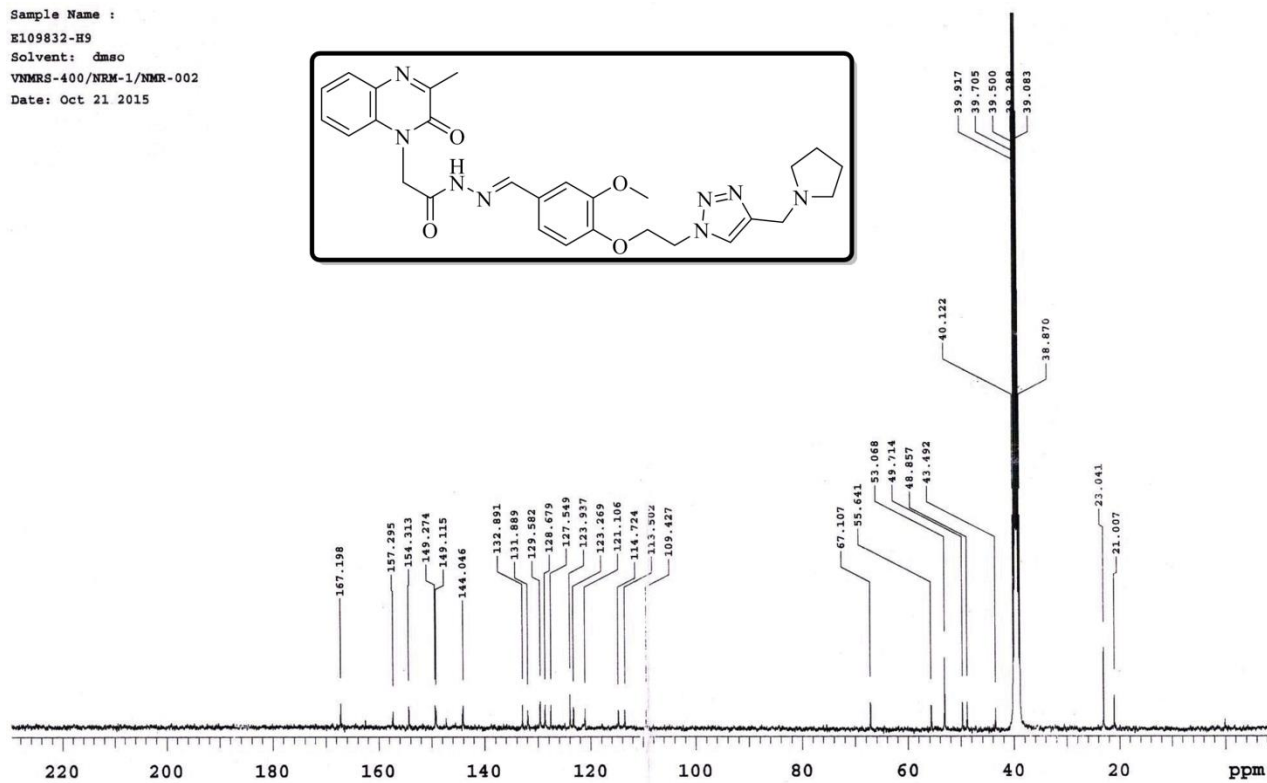

$^{13}\text{C}$ -NMR spectrum of compound **14h**

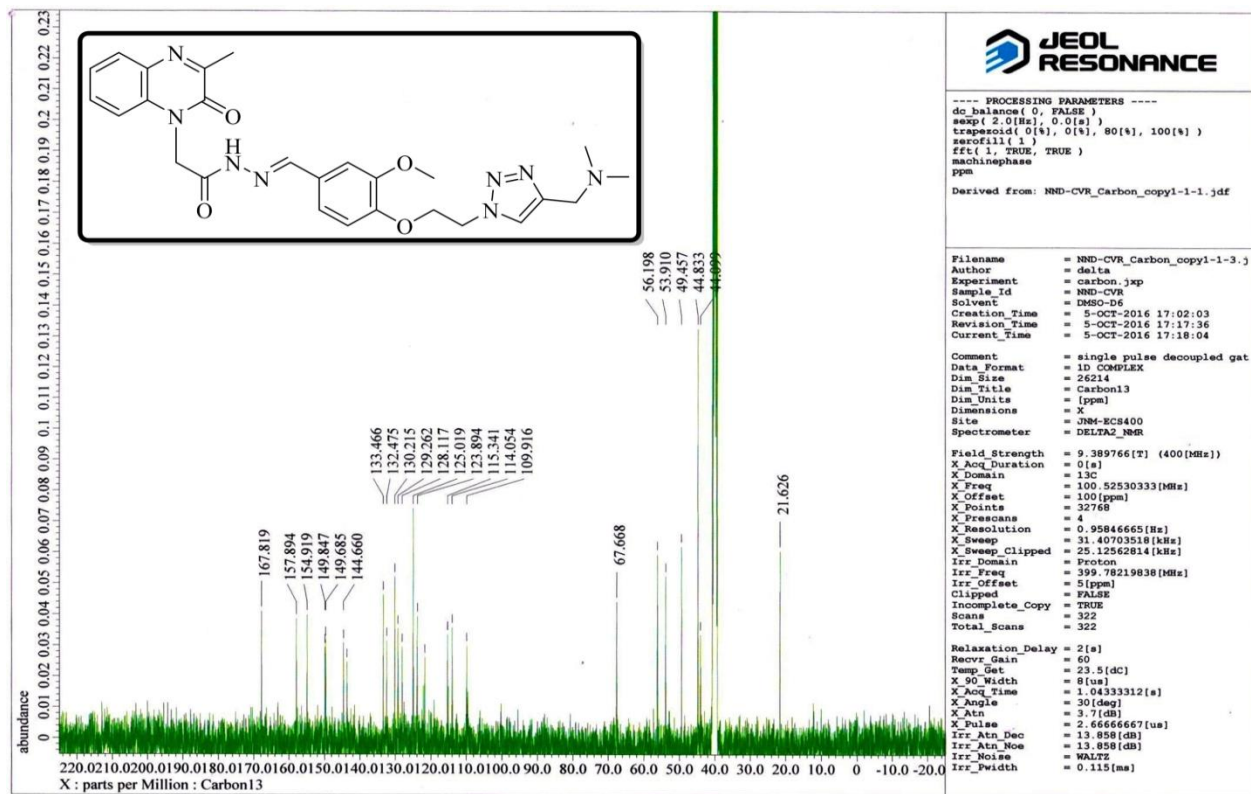

$^{13}\text{C}$ -NMR spectrum of compound **14i**



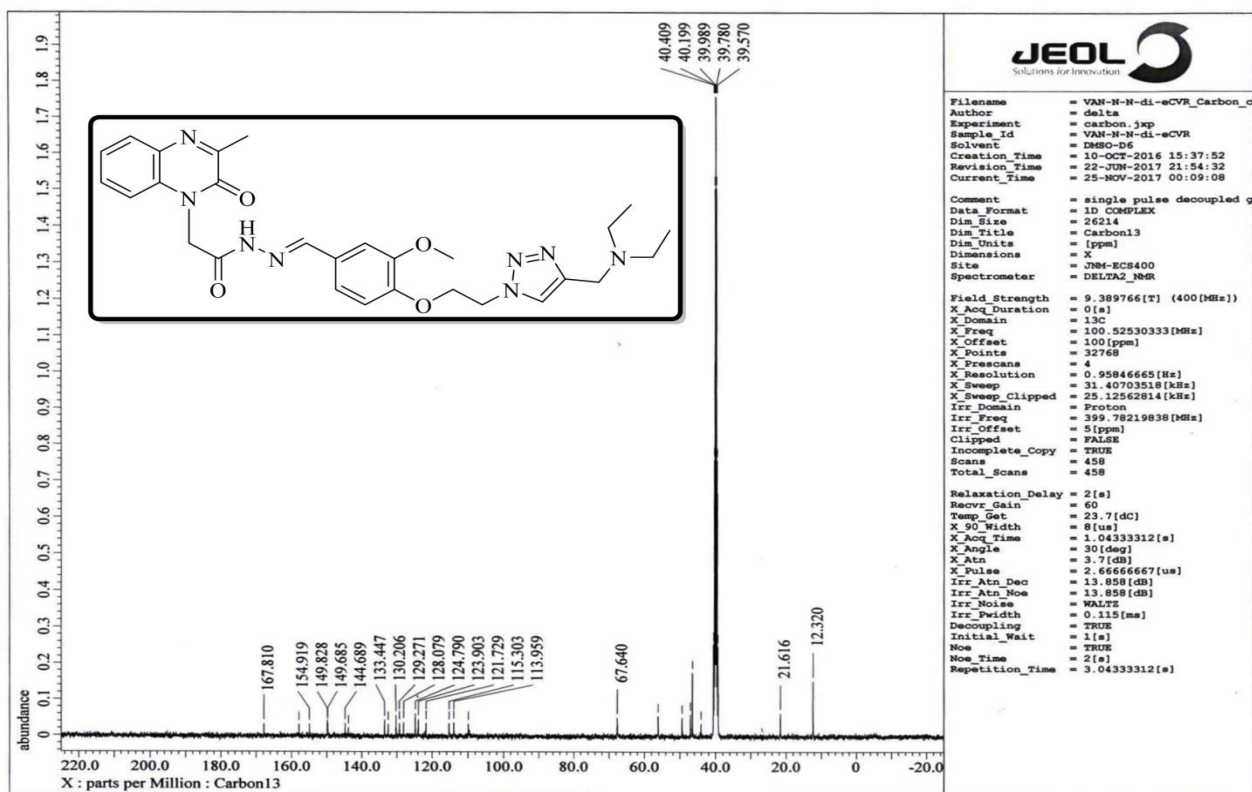

<sup>13</sup>C-NMR spectrum of compound 14j

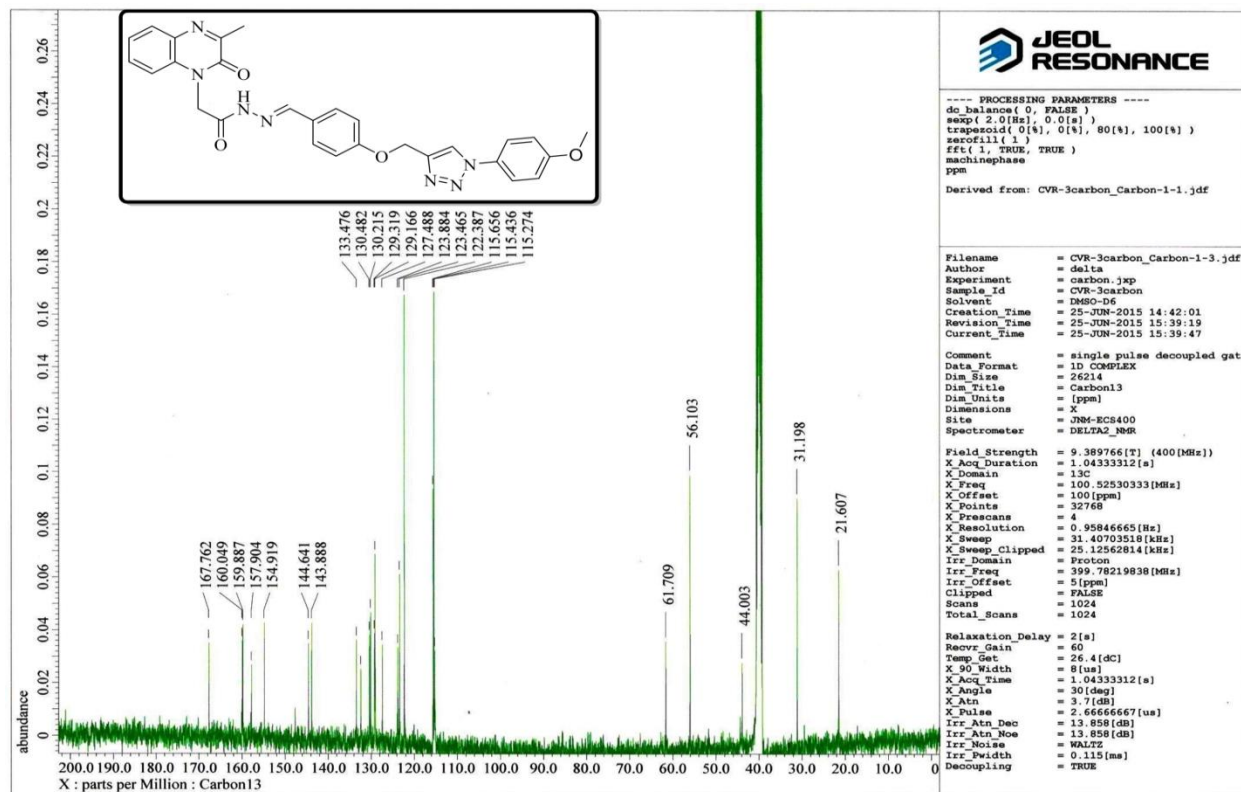

<sup>13</sup>C-NMR spectrum of compound 15b

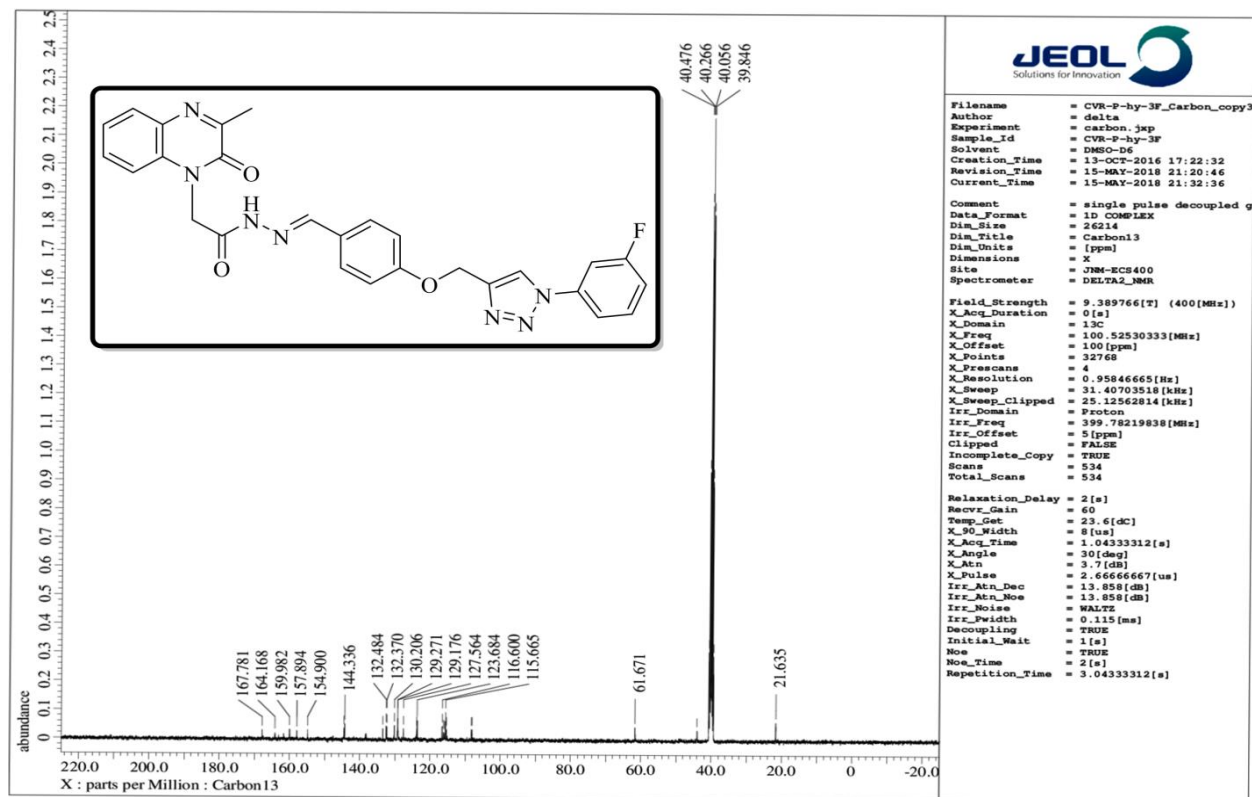

<sup>13</sup>C-NMR spectrum of compound **15c**

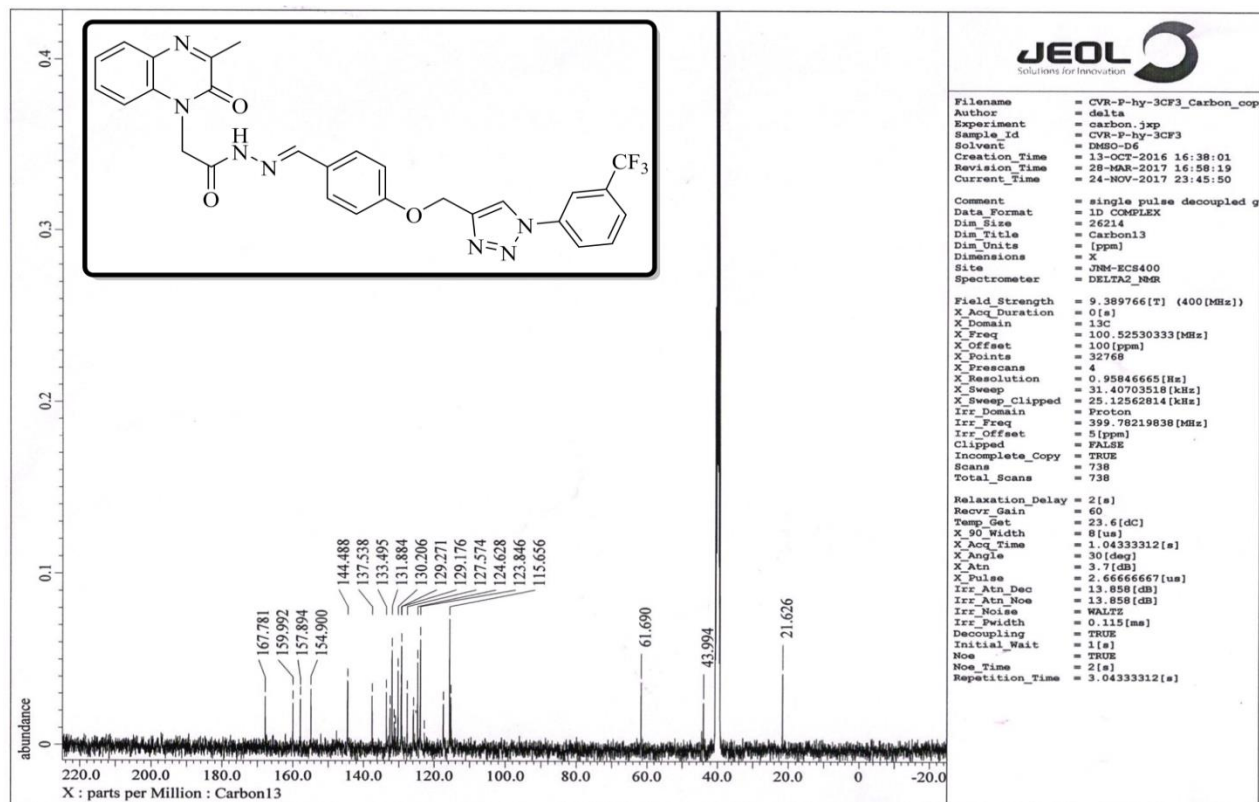

<sup>13</sup>C-NMR spectrum of compound **15d**



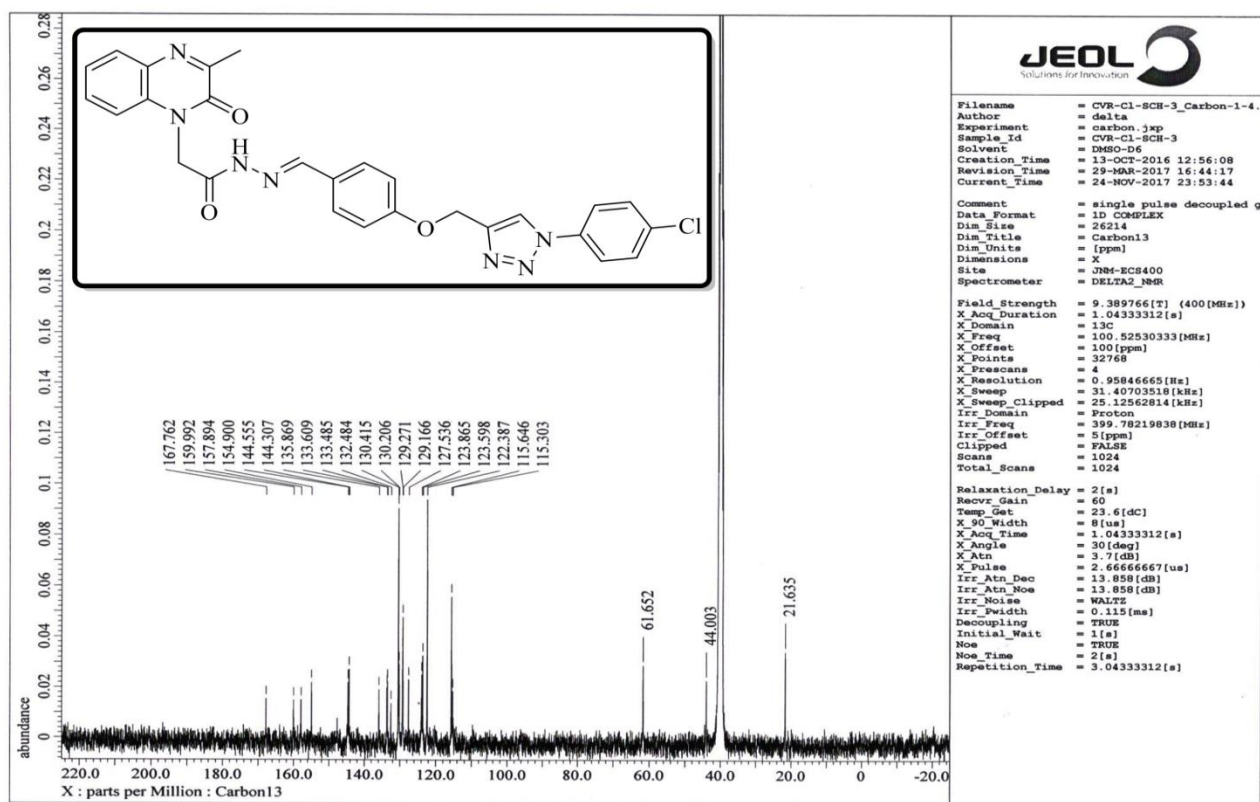

<sup>13</sup>C-NMR spectrum of compound 15e

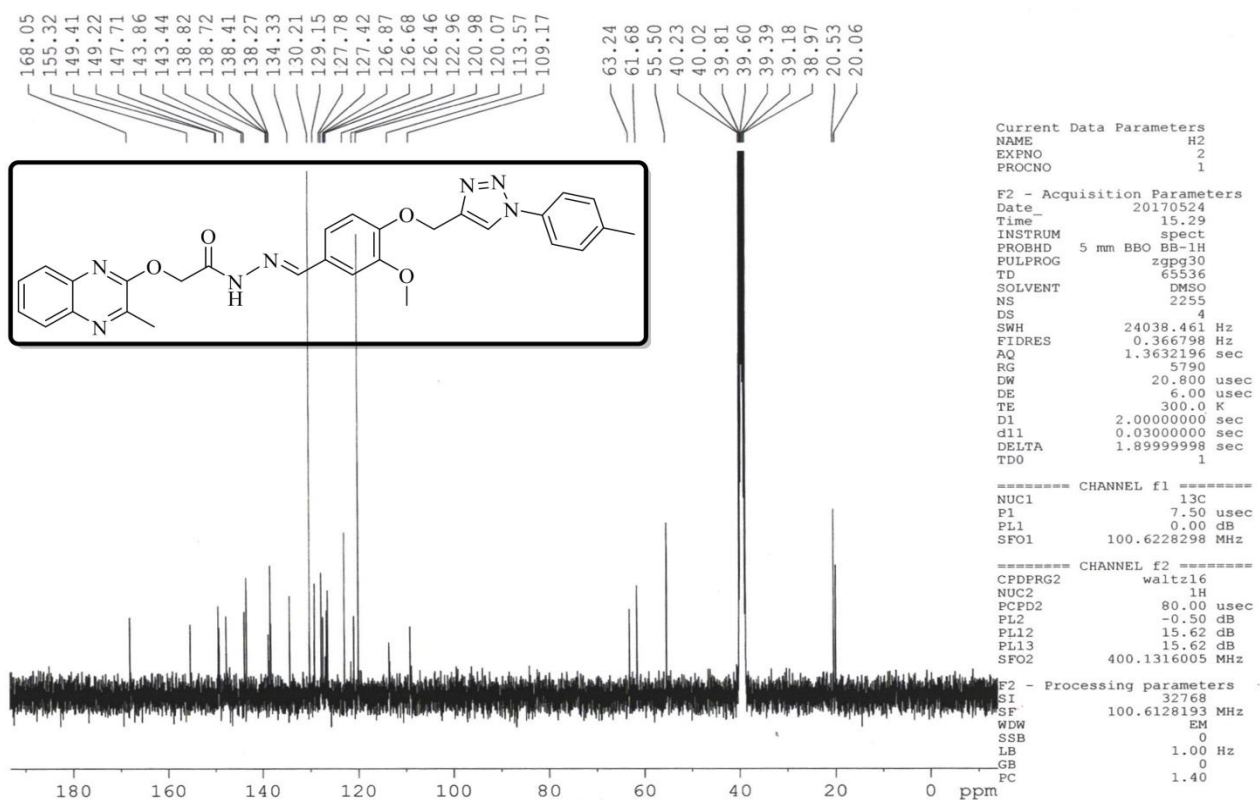

<sup>13</sup>C-NMR spectrum of compound 16a

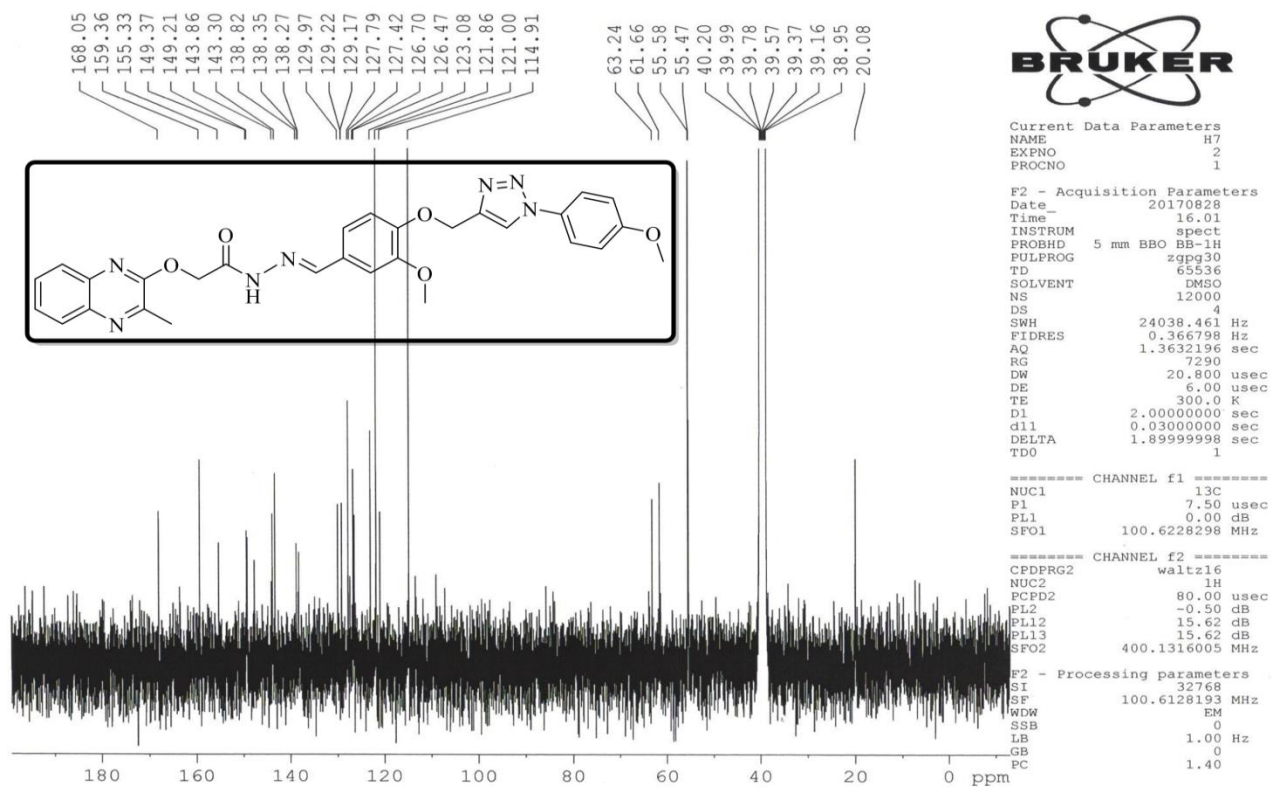

<sup>13</sup>C-NMR spectrum of compound **16b**

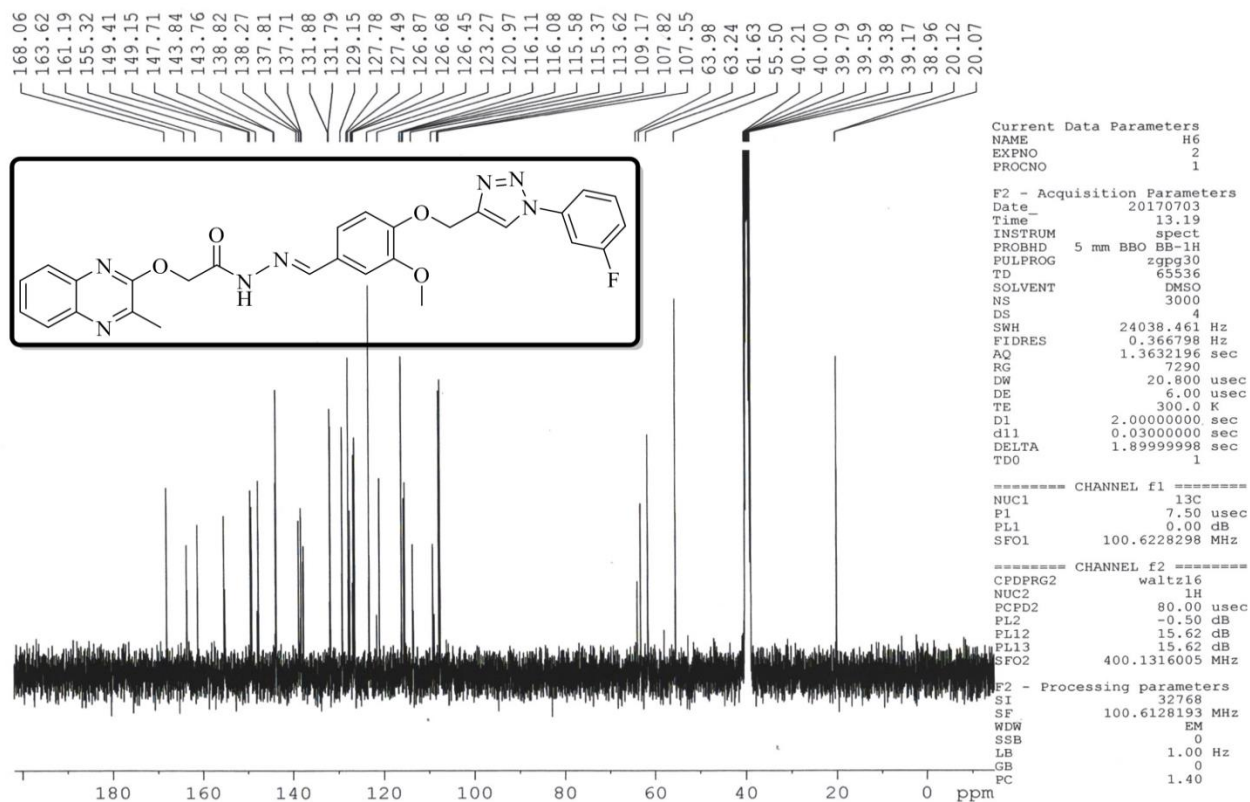

<sup>13</sup>C-NMR spectrum of compound **16c**

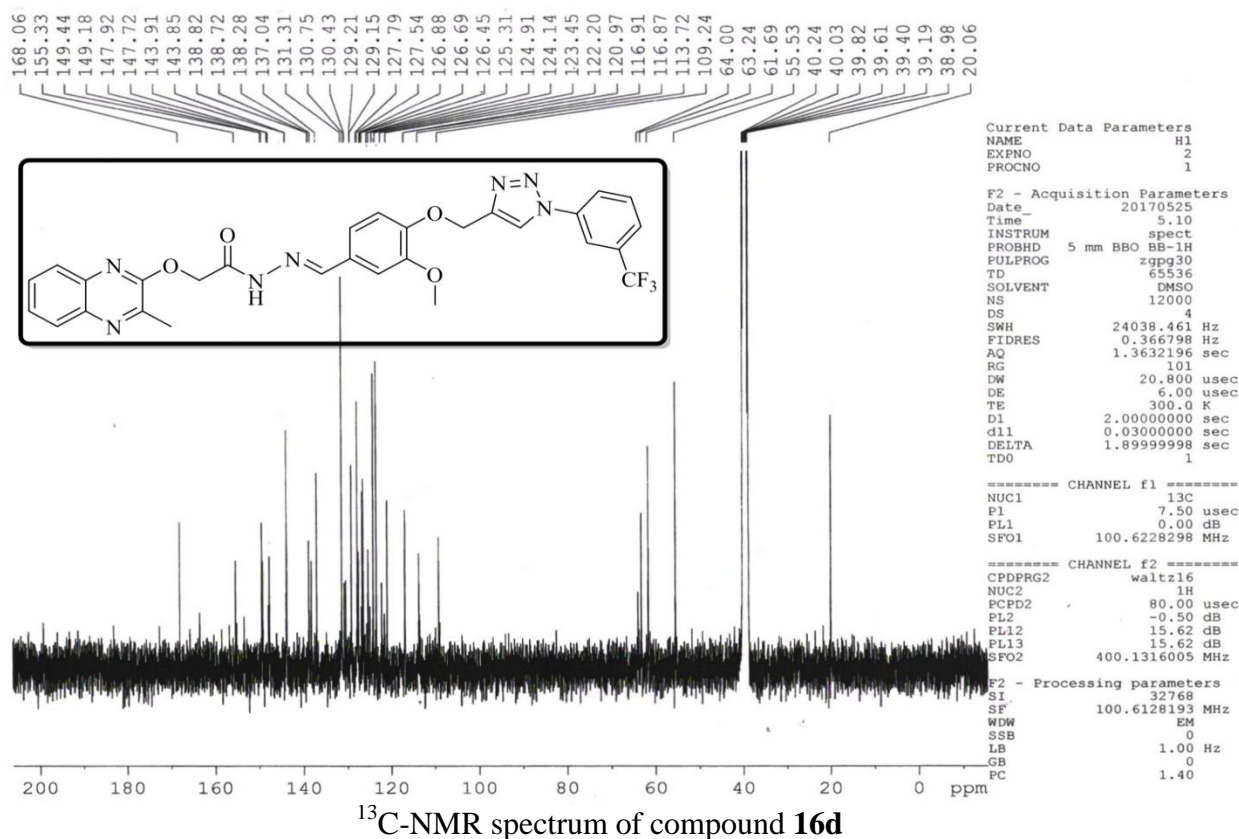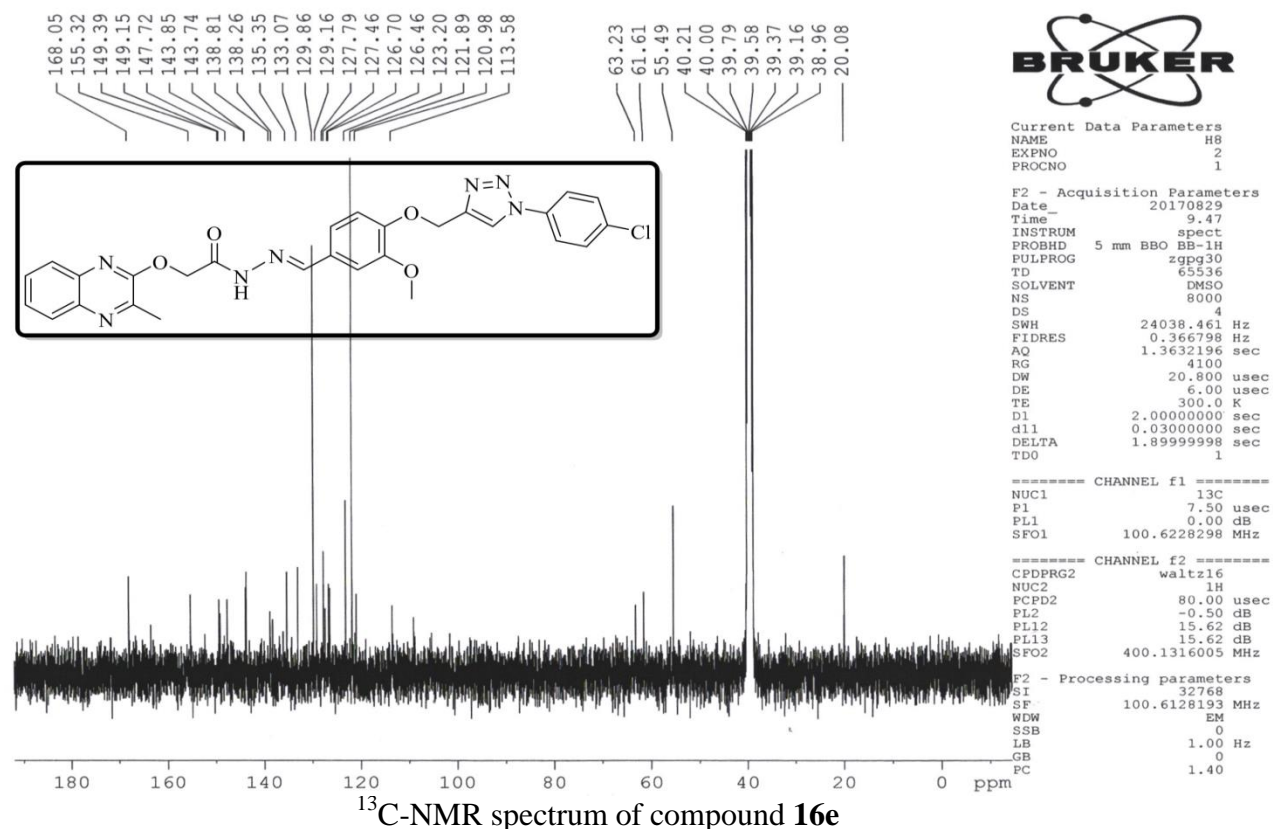

Print of window 79: Apex Mass Spectrum of Peak 3.275 of H16-----010900.D

Apex Mass Spectrum of Peak 3.275 of H16-----010900.D

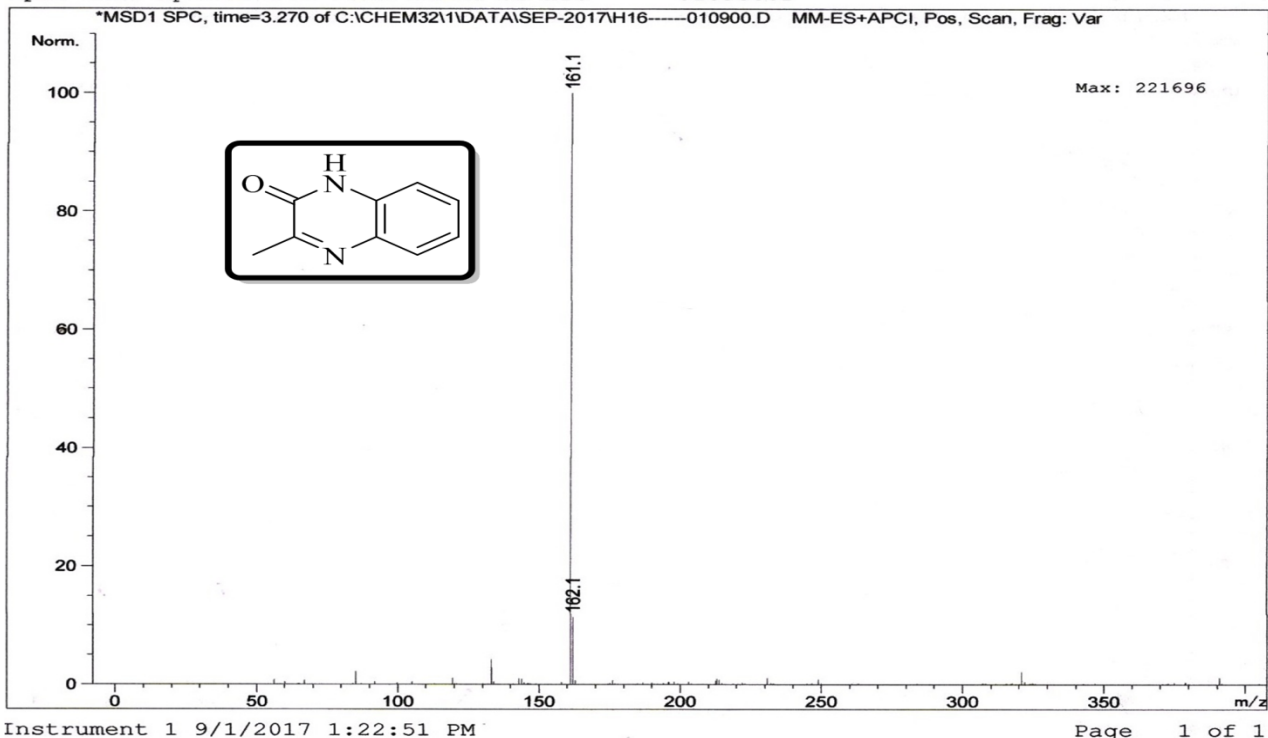

Mass spectrum of compound 1

## ==== Shimadzu LabSolutions Data Report ====

### <Spectrum>

Line#: 1 R.Time: 1.033(Scan#: 63)

MassPeaks: 395

RawMode: Averaged 0.700-1.633(43-99) BasePeak: 247.05(3695471)

BG Mode: Averaged 0.000-0.733(1-45) Segment 1 - Event 1

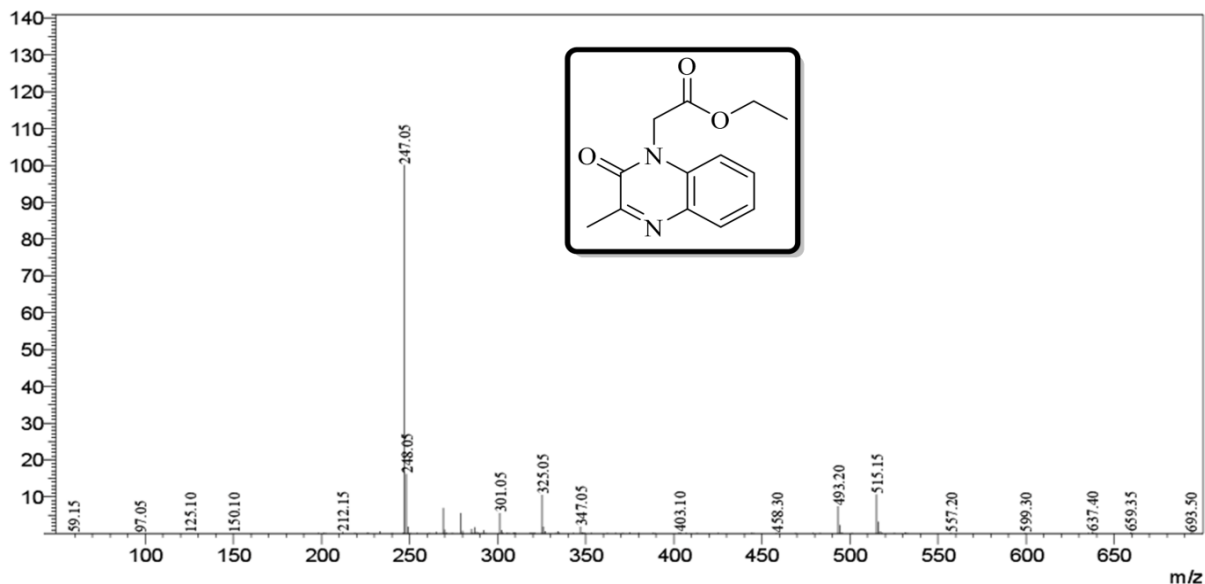



# ==== Shimadzu LabSolutions Data Report ====

## <Spectrum>

Line#: 1 R.Time: 1.033(Scan#: 63)  
MassPeaks: 452  
RawMode: Averaged 0.667-1.800(41-109) BasePeak: 247.05(6212789)  
BG Mode: Averaged 0.000-0.700(1-43) Segment 1 - Event 1

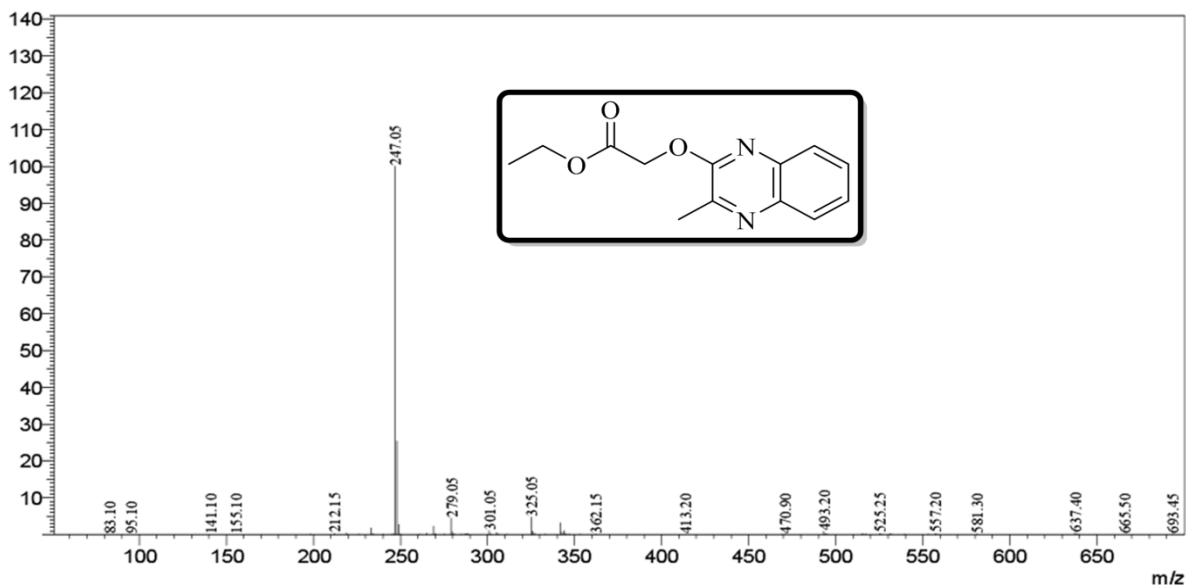

Mass spectrum of compound 2a

Print of window 79: Apex Mass Spectrum of Peak 5.311 of H17-----020900.D  
Apex Mass Spectrum of Peak 5.311 of H17-----020900.D

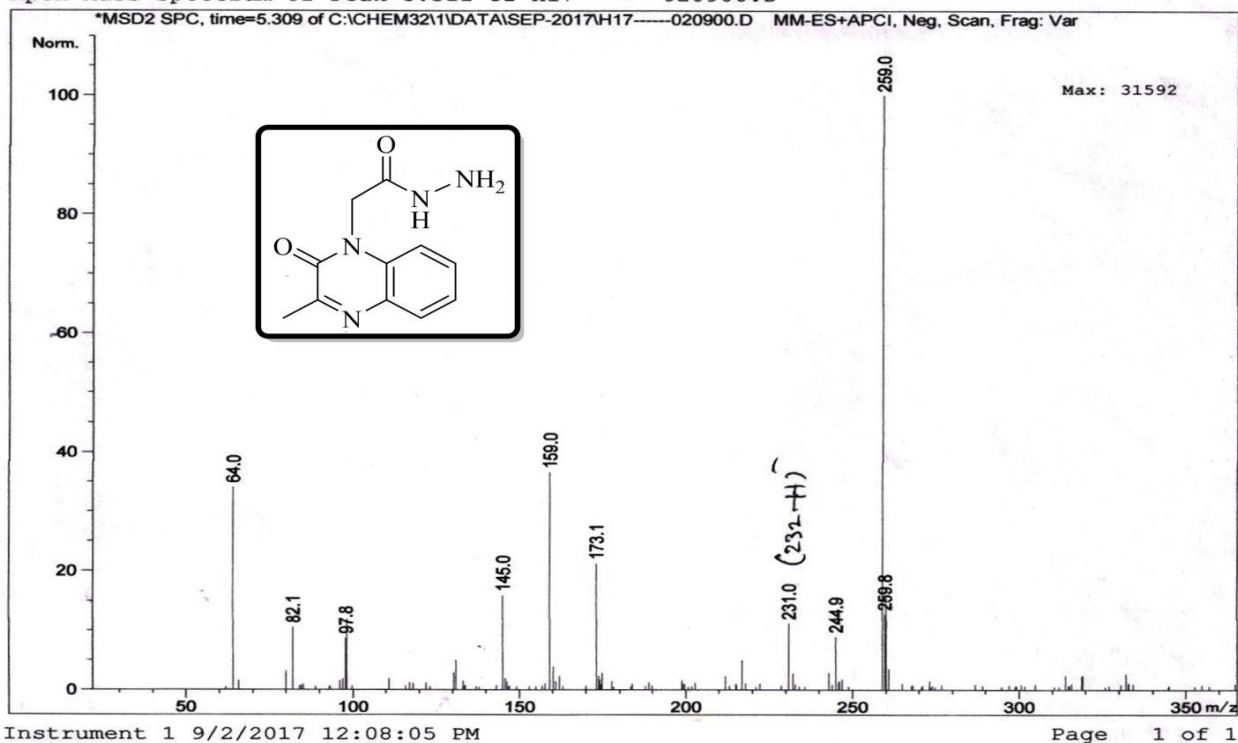

Mass spectrum of compound 3



Print of window 79: Apex Mass Spectrum of Peak 4.285 of H18-----020900.D  
 Apex Mass Spectrum of Peak 4.285 of H18-----020900.D

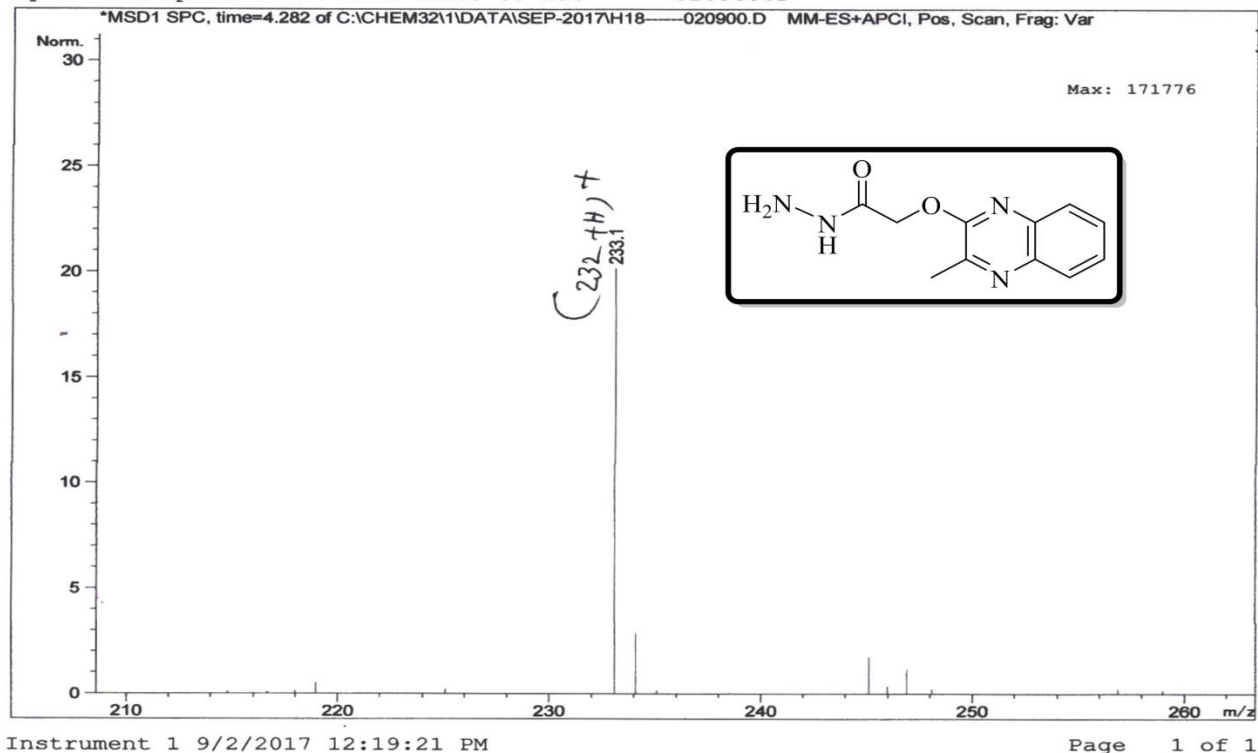

Mass spectrum of compound 3a

## ==== Shimadzu LabSolutions Data Report =====

### <Spectrum>

Line# 1 R.Time:1.067(Scan#65)  
 MassPeaks:477  
 RawMode:Averaged 0.600-1.667(37-101) BasePeak:317.10(6178998)  
 BG Mode:Averaged 0.000-0.667(1-41) Segment 1 - Event 1

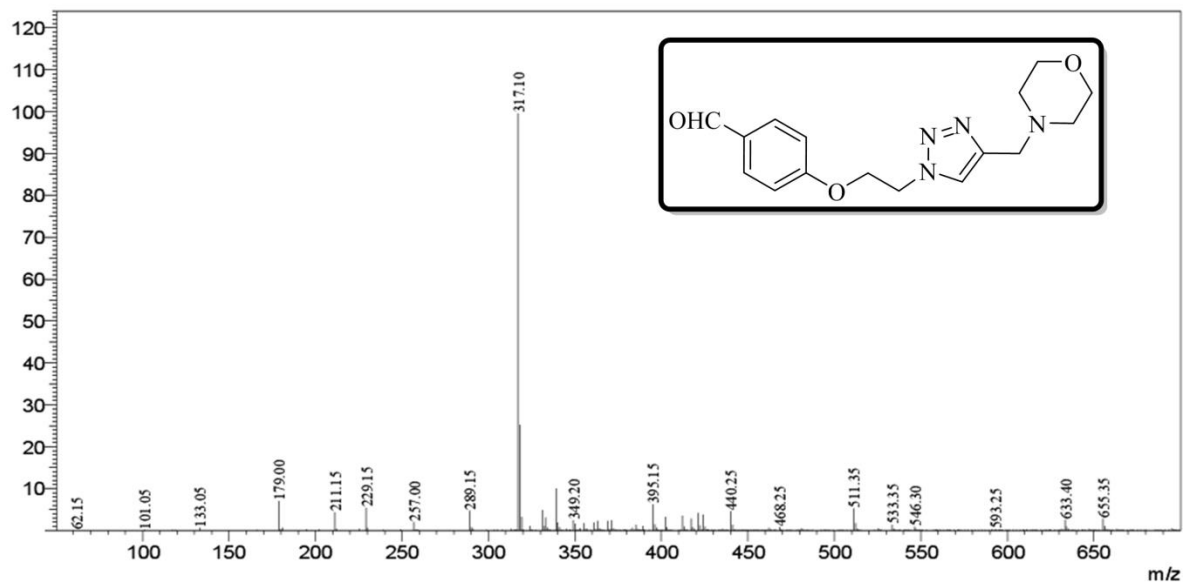

# ==== Shimadzu LabSolutions Data Report =====

## <Spectrum>

Line#:1 R.Time:1.100(Scan#:67)  
 MassPeaks:531  
 RawMode:Averaged 0.700-1.767(43-107) BasePeak:303.15(5868517)  
 BG Mode:Averaged 0.000-0.667(1-41) Segment 1 - Event 1

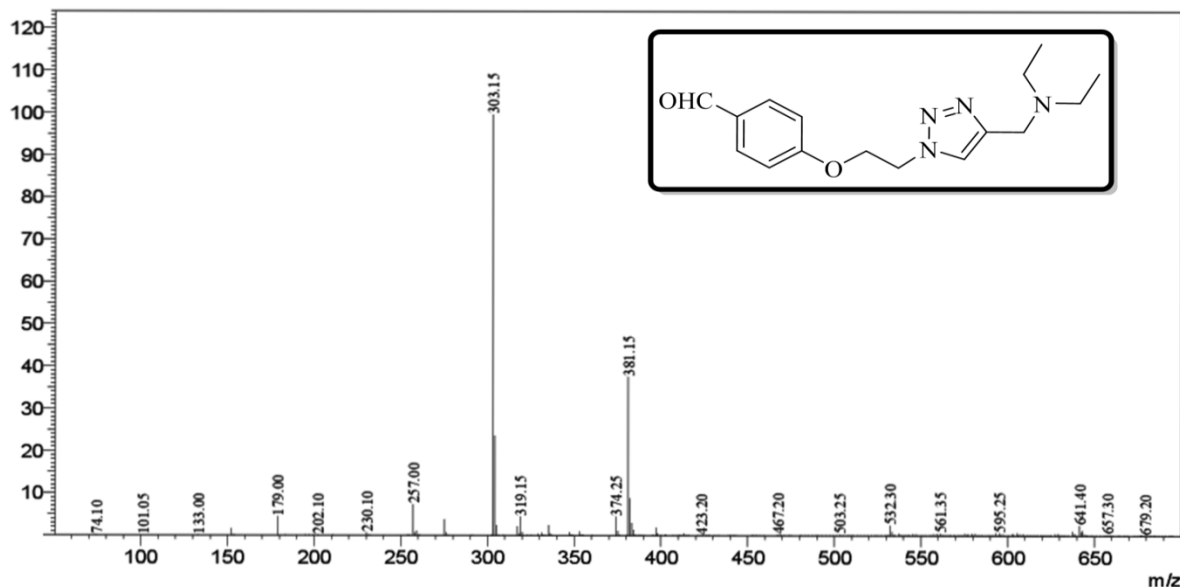

# ==== Shimadzu LabSolutions Data Report =====

## <Spectrum>

Line#:1 R.Time:1.100(Scan#:67)  
 MassPeaks:489  
 RawMode:Averaged 0.667-1.767(41-107) BasePeak:345.15(5152477)  
 BG Mode:Averaged 0.000-0.633(1-39) Segment 1 - Event 1

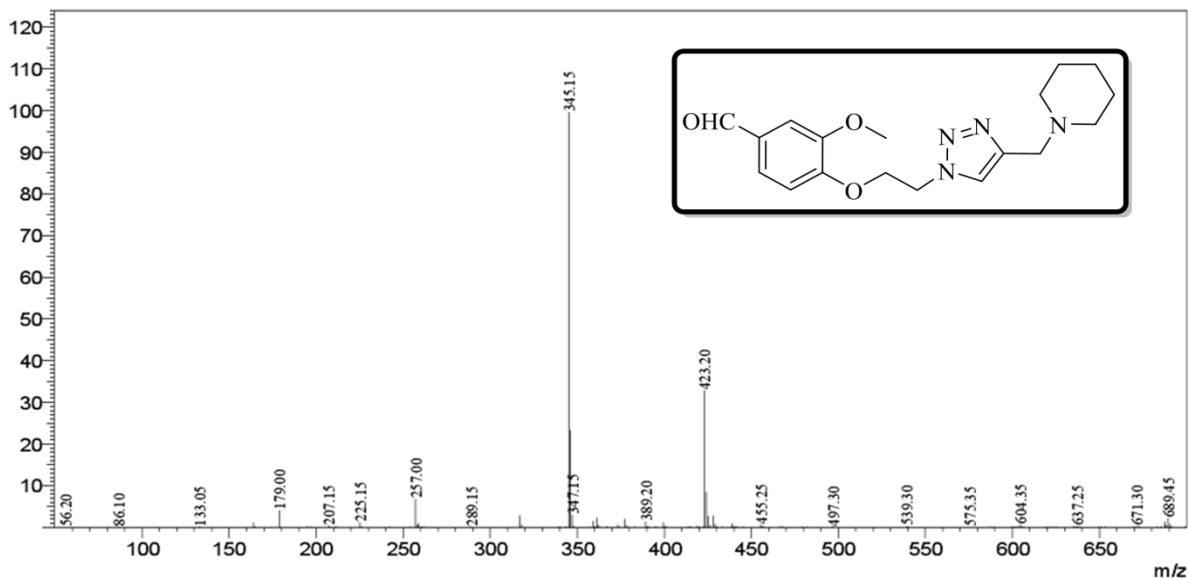

# ==== Shimadzu LabSolutions Data Report ====

## <Spectrum>

Line#: 1 R.Time: 1.067(Scan#: 65)  
MassPeaks: 555  
RawMode: Averaged 0.700-1.867(43-113) BasePeak: 305.15(5102817)  
BG Mode: Averaged 0.000-0.667(1-41) Segment 1 - Event 1

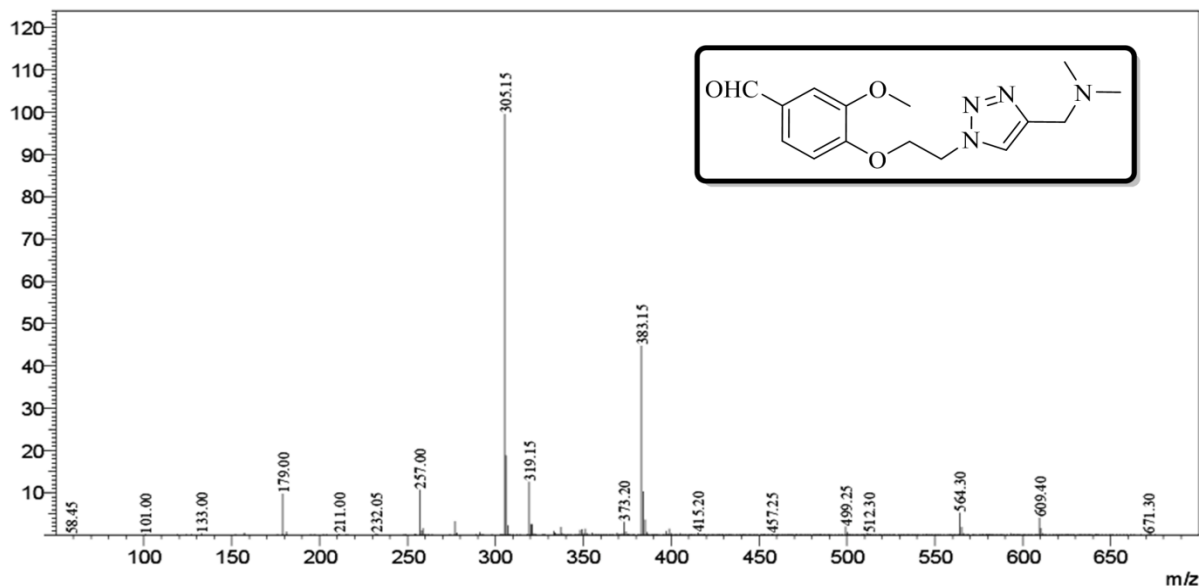

Mass spectrum of compound 13i

# ==== Shimadzu LabSolutions Data Report ====

## <Spectrum>

Line#: 1 R.Time: 1.100(Scan#: 67)  
MassPeaks: 470  
RawMode: Averaged 0.667-1.833(41-111) BasePeak: 333.15(5498728)  
BG Mode: Averaged 0.000-0.633(1-39) Segment 1 - Event 1

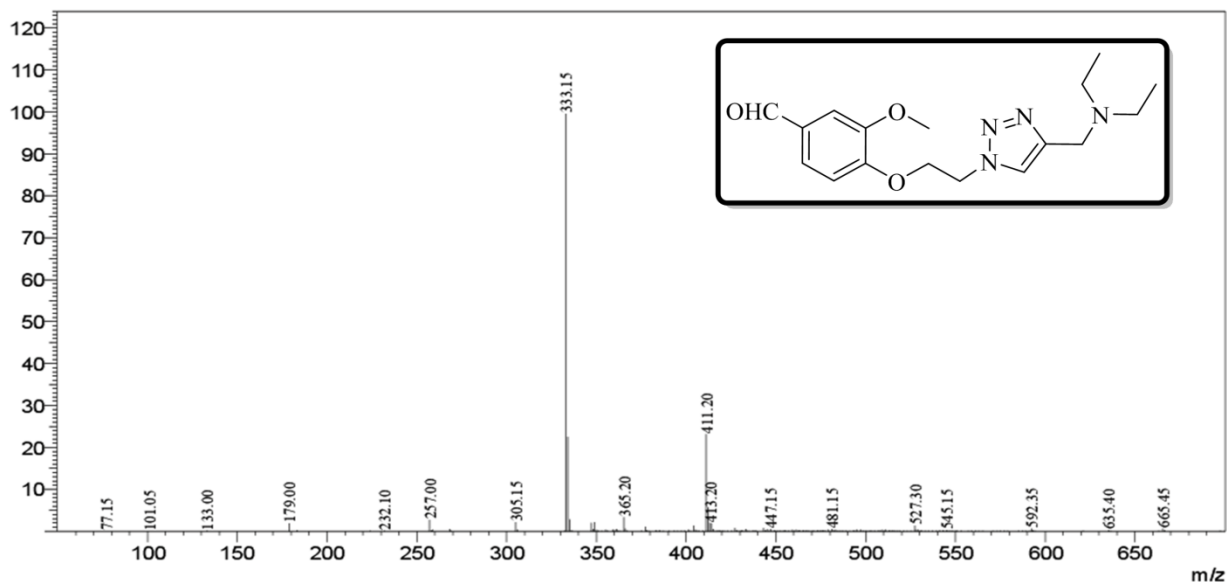

Mass spectrum of compound 13j

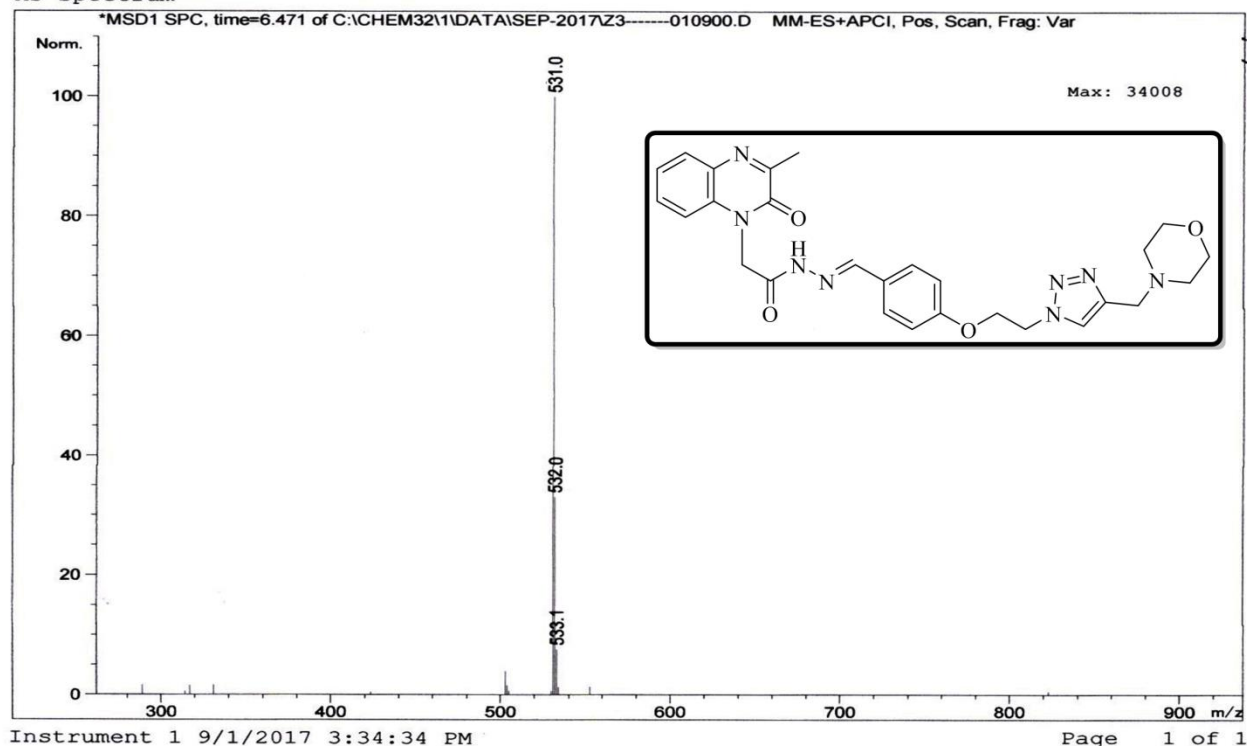

Mass spectrum of compound **14a**

==== Shimadzu LabSolutions Data Report ====

<Spectrum>

Line# 1 R.Time:0.933(Scan#:57)  
MassPeaks:103  
RawMode:Averaged 0.633-1.767(39-107) BasePeak:515.30(7625470)  
BG Mode:Averaged 0.000-0.667(1-41) Segment 1 - Event 1

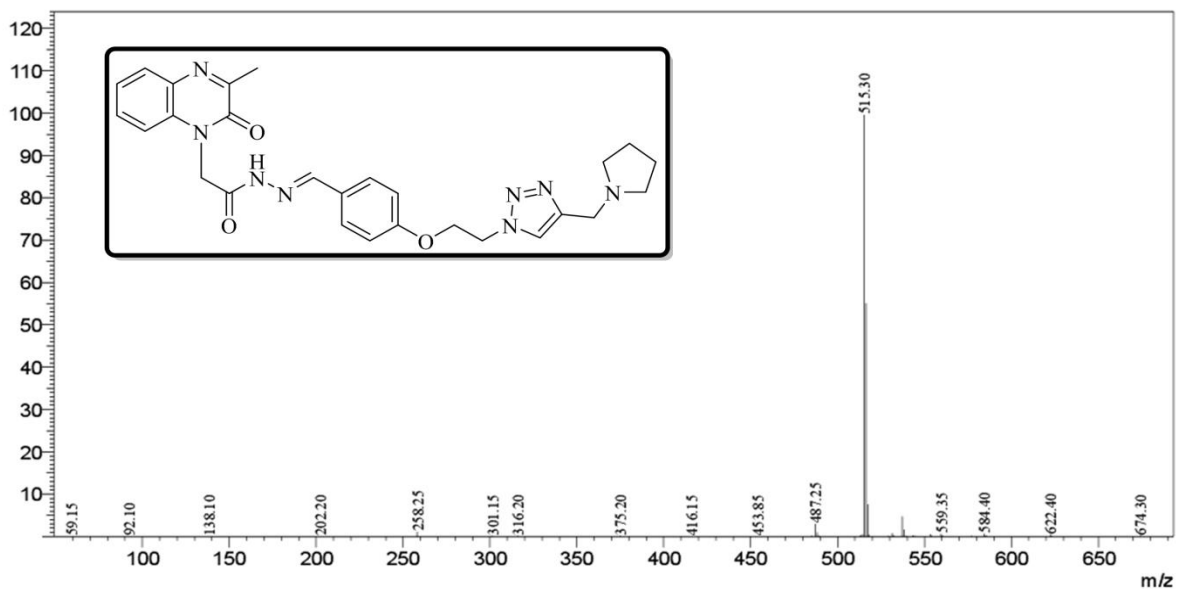

Sample ID :3-E118238-5  
Acq.Method :RND-FA-4-5MIN  
27102014-3-E118238-5A 59 (1.538)

Date of Analysis :27-Oct-2014;20:58:54  
Instrument Id :ANL-MCL1-LC-MS-002  
2: Scan ES+  
3.99e7

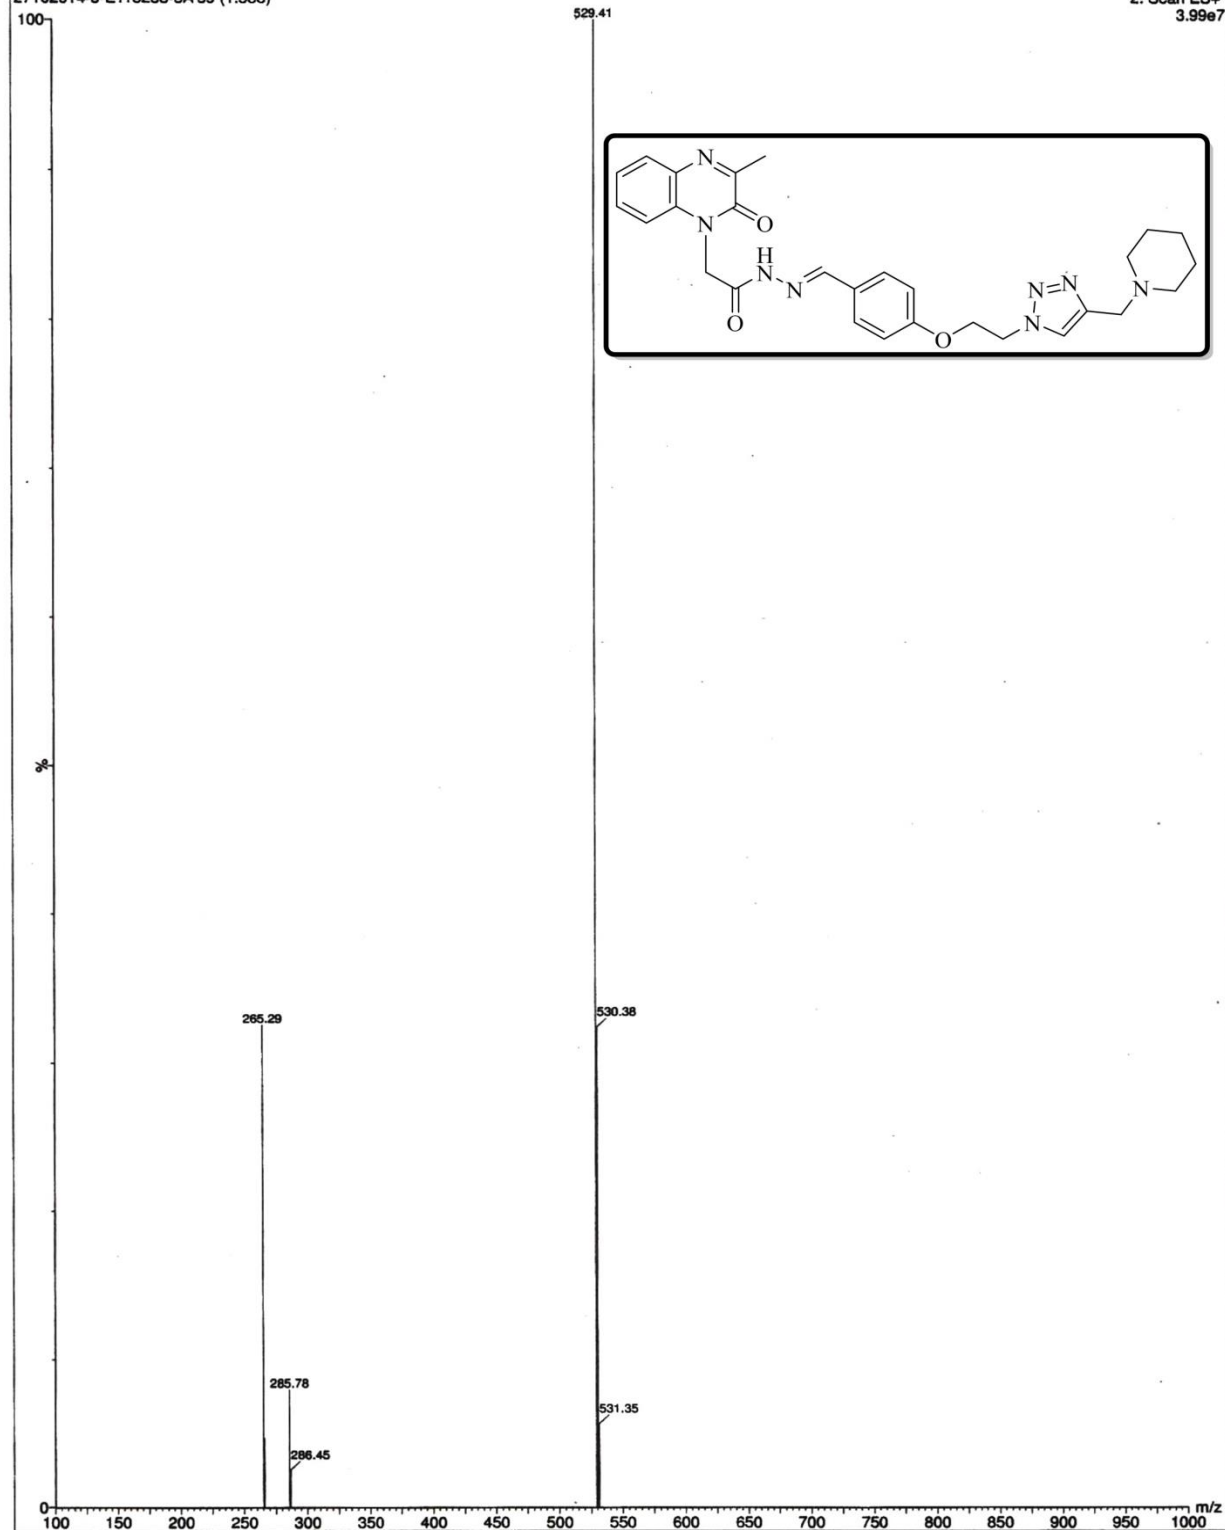

Mass spectrum of compound 14b



Sample ID :3-E118238-5  
Acq.Method :RND-FA-4-5MIN  
27102014-3-E118238-5A

Date of Analysis :20:58:54;27-Oct-2014  
Instrument Id : ANL-MCL1-LC-MS-002

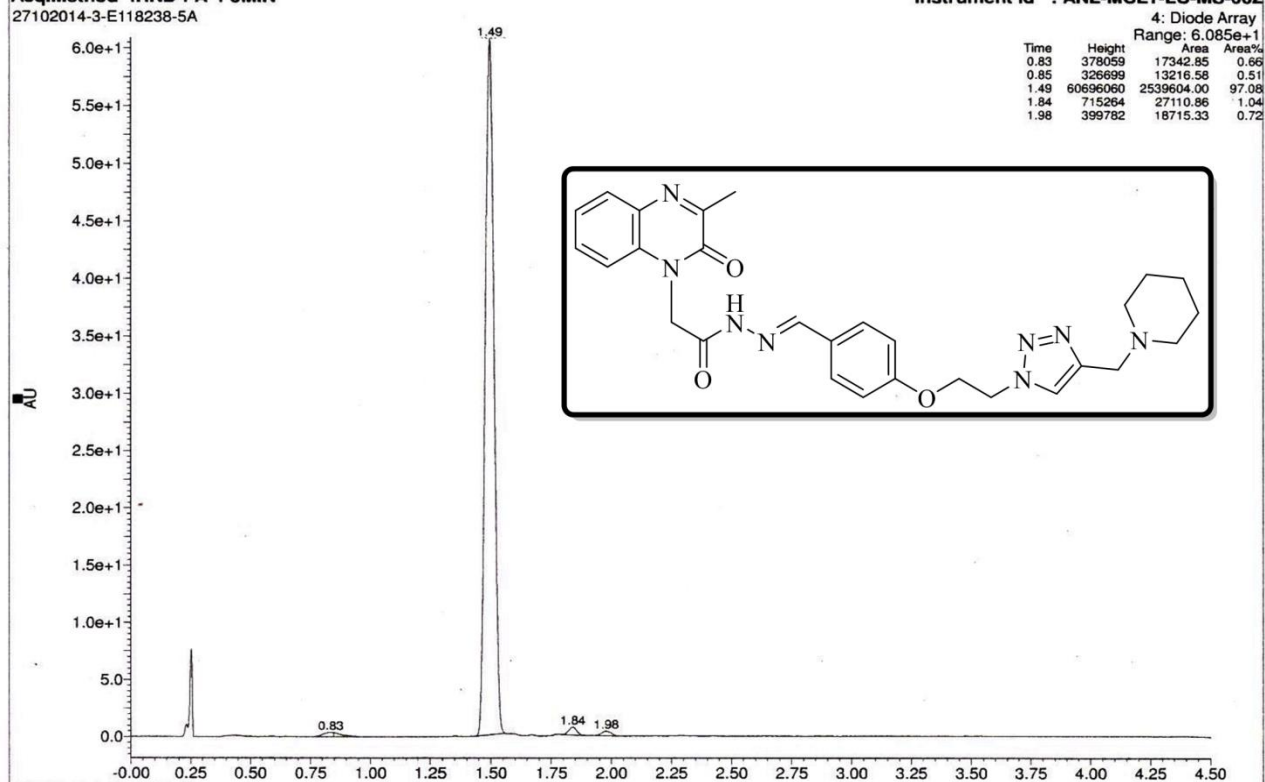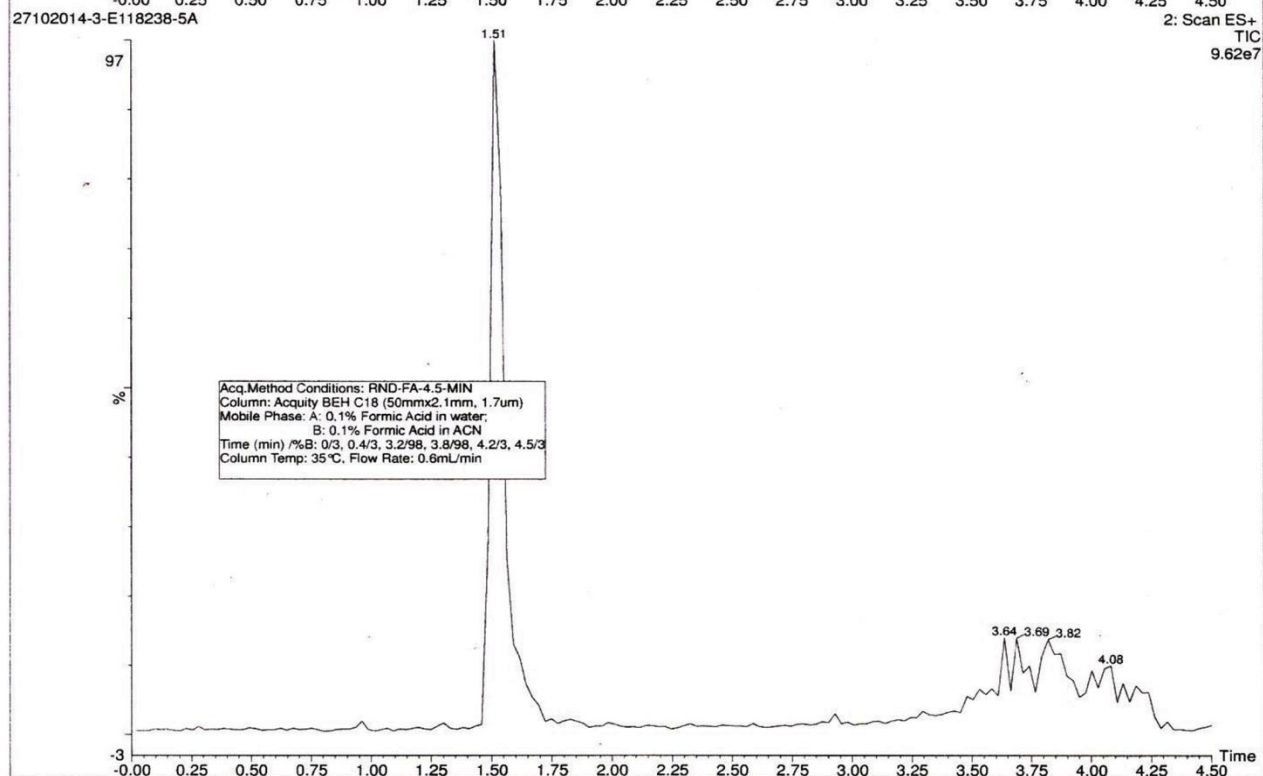

Mass spectrum of compound **14b**

Print of window 79: Apex Mass Spectrum of Peak 6.37 of Z4-----010900.D

Apex Mass Spectrum of Peak 6.37 of Z4-----010900.D

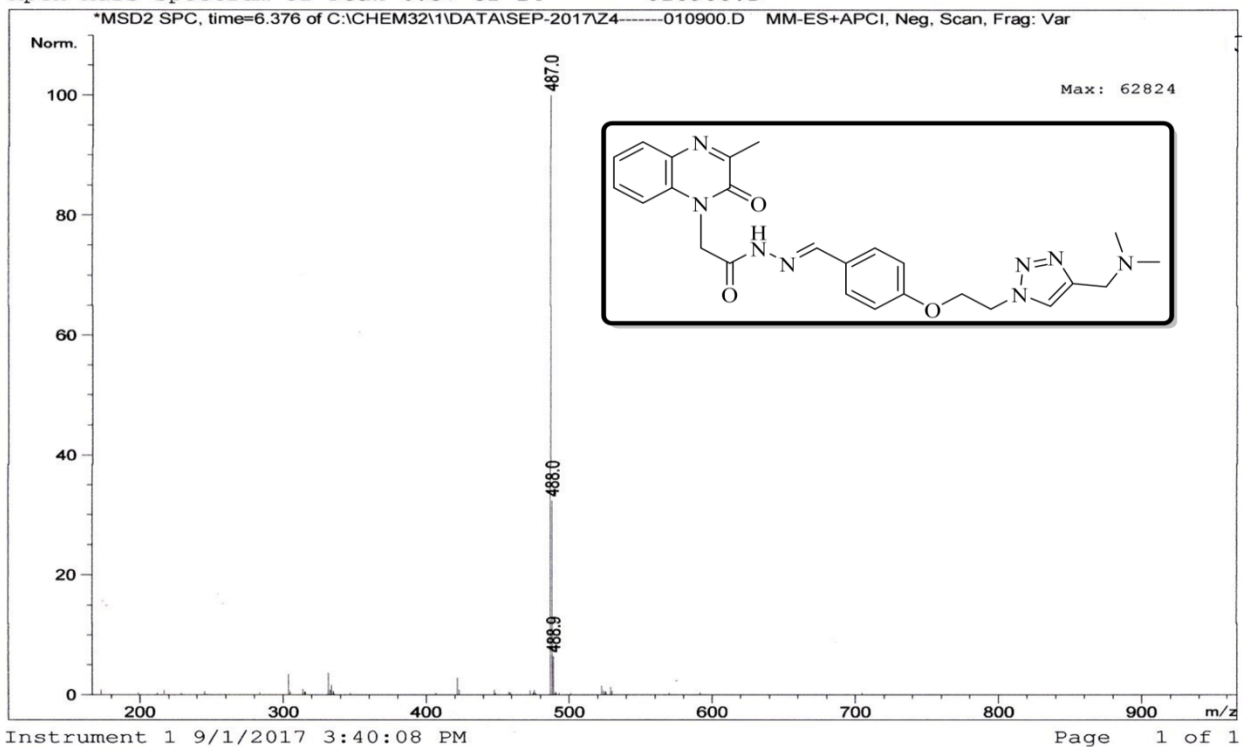

## ==== Shimadzu LabSolutions Data Report =====

### <Spectrum>

Line#:1 R.Time:1.033(Scan#:63)

MassPeaks:284

RawMode:Averaged 0.633-1.633(39-99) BasePeak:517.30(7249564)

BG Mode:Averaged 0.000-0.600(1-37) Segment 1 - Event 1

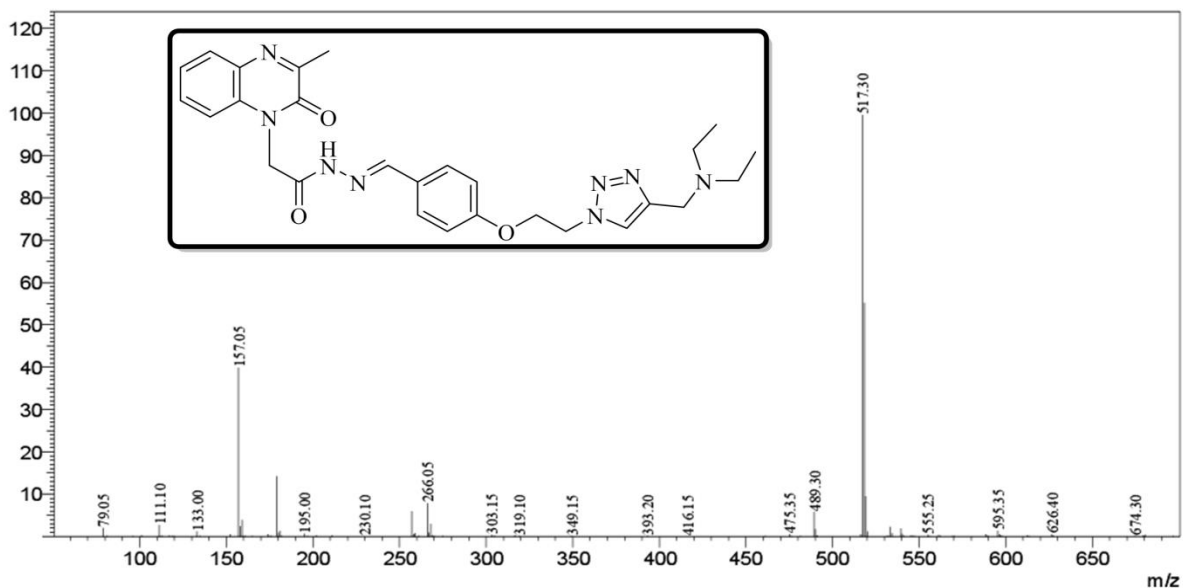

Print of window 79: Apex Mass Spectrum of Peak 6.451 of Z5-----010900.D  
 Apex Mass Spectrum of Peak 6.451 of Z5-----010900.D

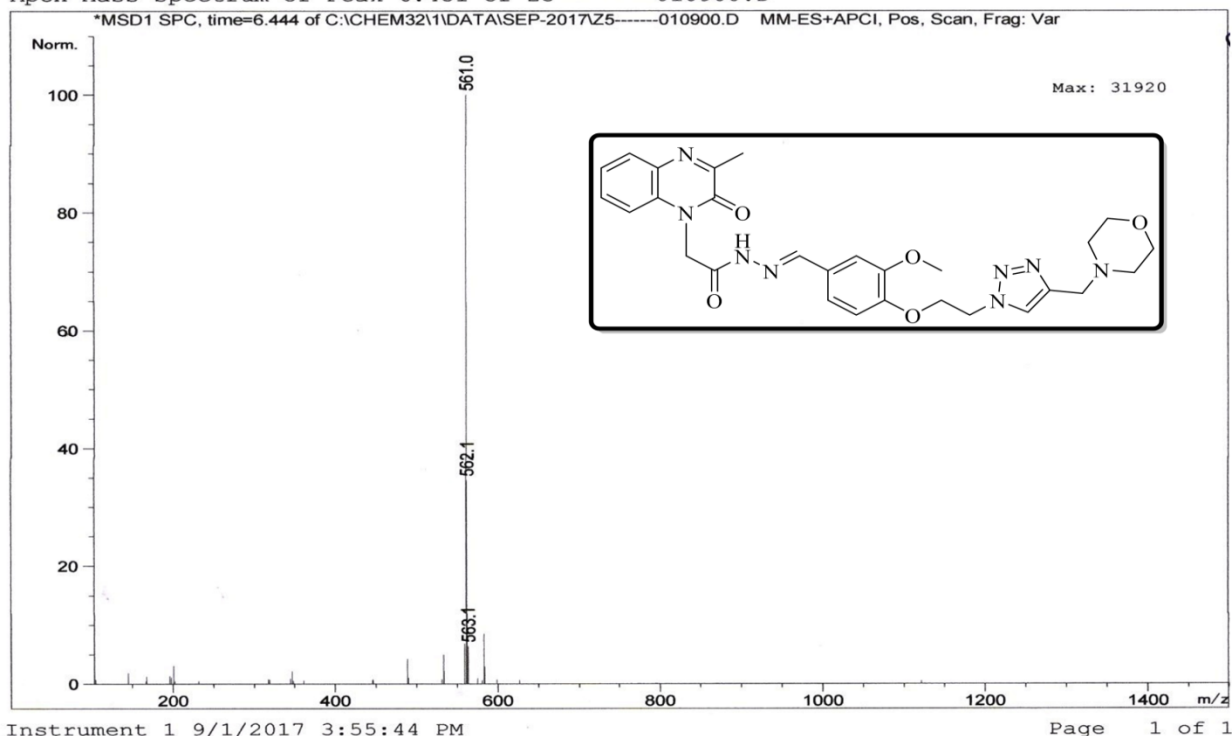

Mass spectrum of compound **14f**

Print of window 79: Apex Mass Spectrum of Peak 6.438 of Z6-----010900.D  
 Apex Mass Spectrum of Peak 6.438 of Z6-----010900.D

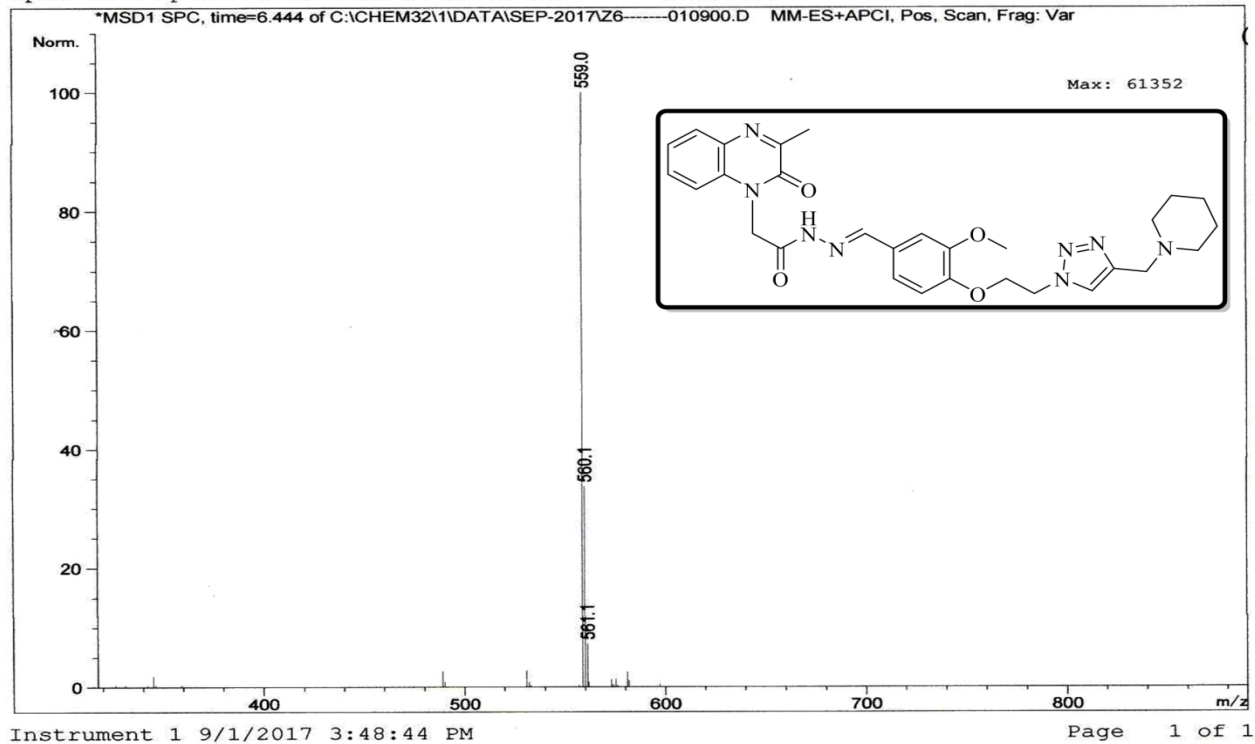

Mass spectrum of compound **14g**

# ==== Shimadzu LabSolutions Data Report ====

## <Spectrum>

Line#:1 R.Time:1.200(Scan#:73)  
MassPeaks:214  
RawMode:Averaged 0.733-1.800(45-109) BasePeak:545.30(649505)  
BG Mode:Averaged 0.000-0.700(1-43) Segment 1 - Event 1

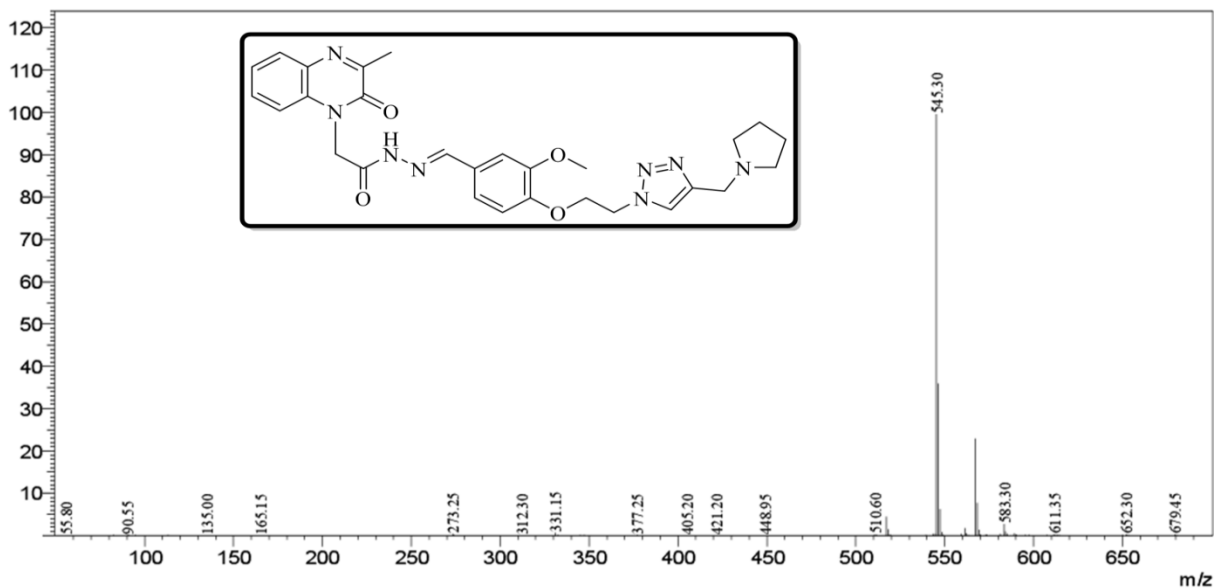

Mass spectrum of compound 14h

Print of window 79: Apex Mass Spectrum of Peak 7.401 of Z9-----020900.D  
Apex Mass Spectrum of Peak 7.401 of Z9-----020900.D

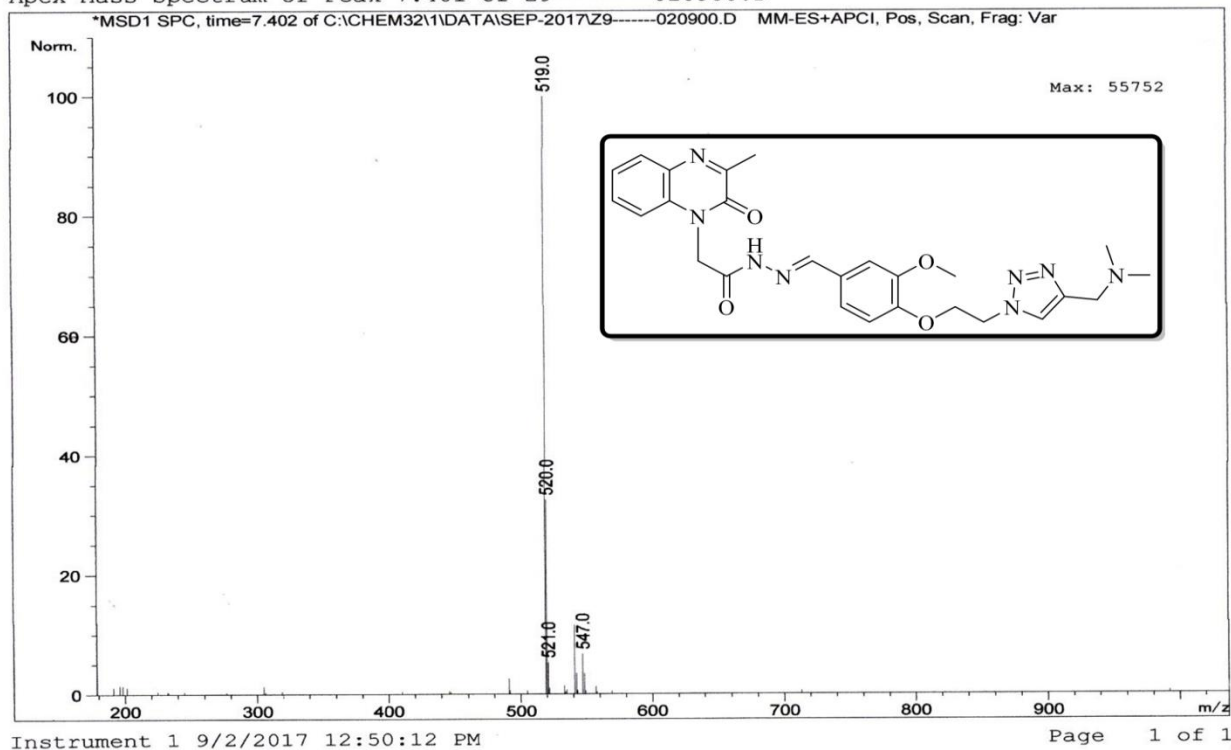

Mass spectrum of compound 14i

Sample ID :2-E118238-34  
Acq.Method :RND-FA-4-5MIN

Date of Analysis :27-Oct-2014;20:52:06  
Instrument Id :ANL-MCL1-LC-MS-002

27102014-2-E118238-34A 65 (1.695) Cm (64:67)

2: Scan ES+  
2.74e5

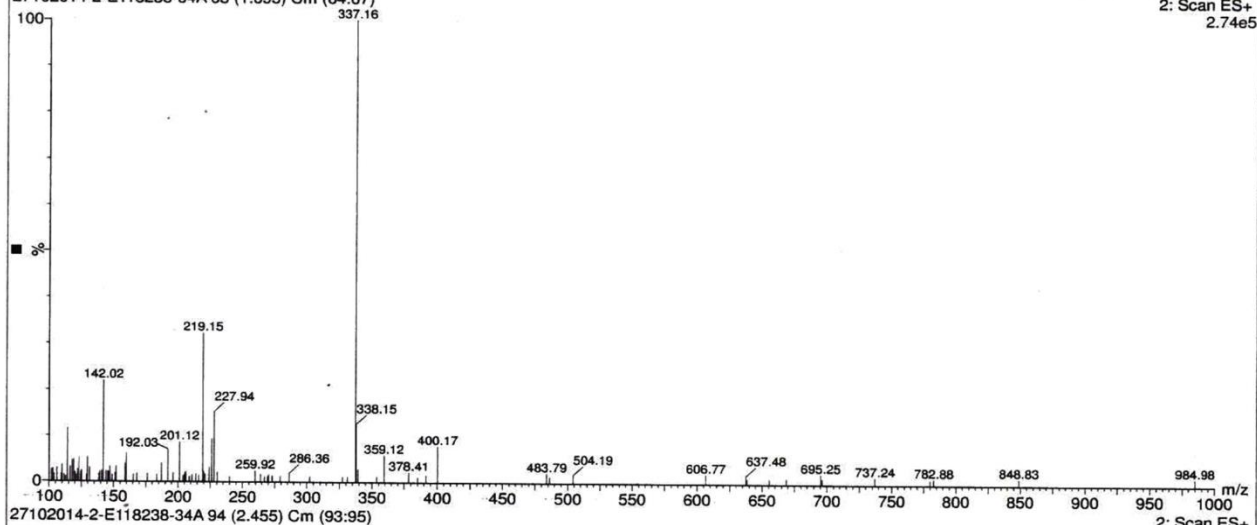

2: Scan ES+  
4.41e6

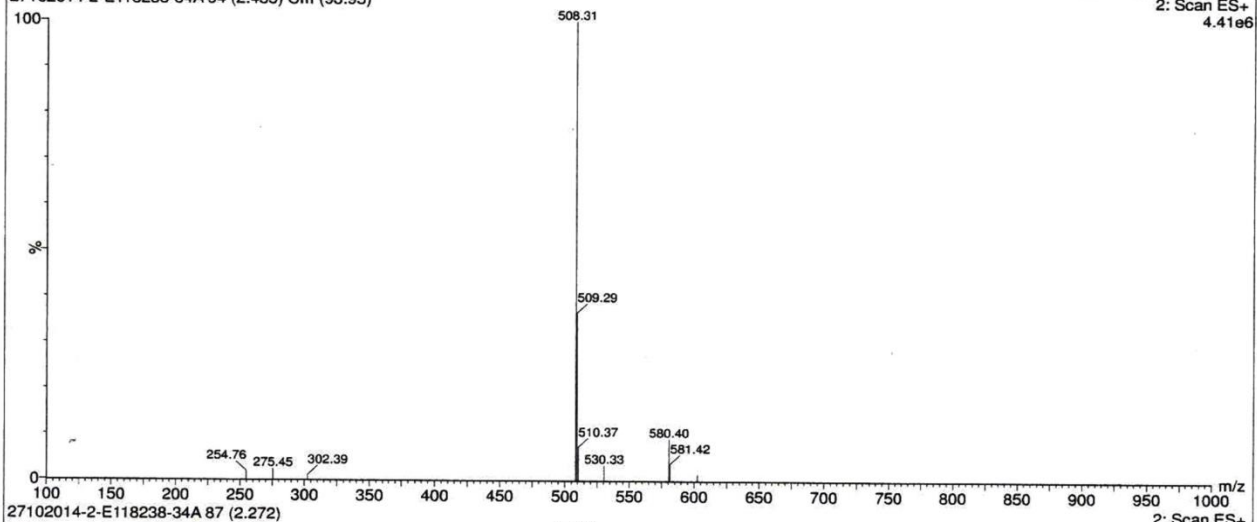

2: Scan ES+  
3.95e6

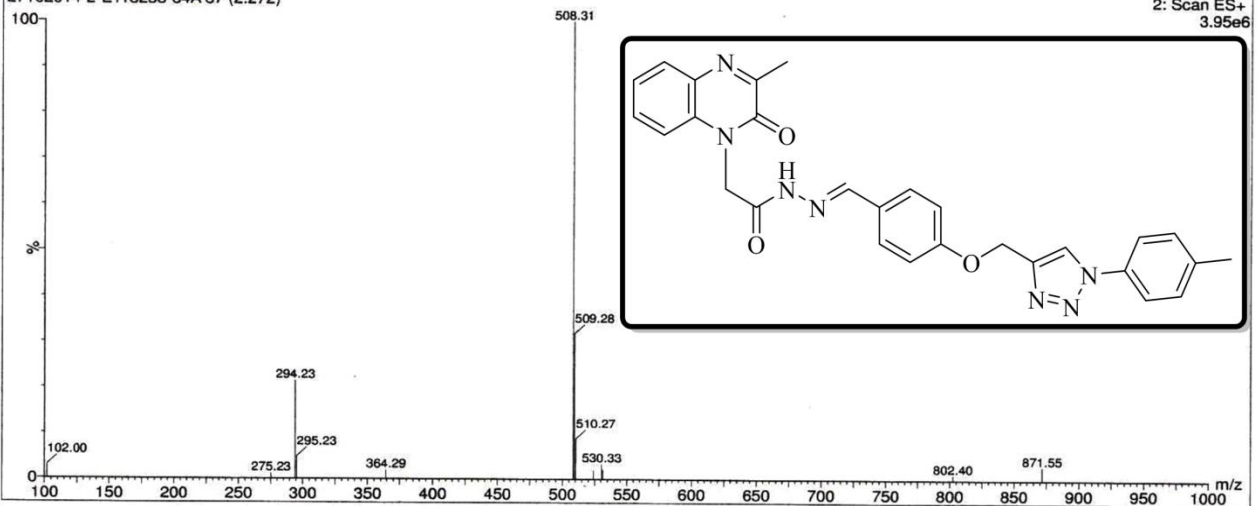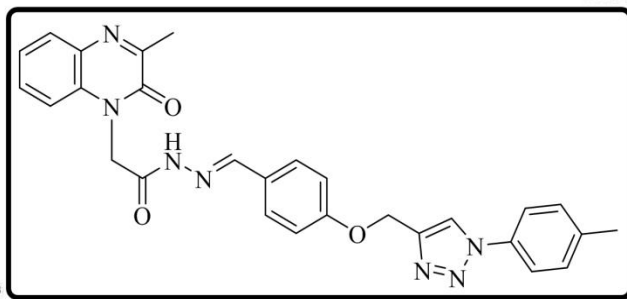

Mass spectrum of compound **15a**



Medicinal Chemistry Laboratory-Analytical Research

Sample ID :2-E118238-34  
Acq.Method :RND-FA-4-5MIN  
27102014-2-E118238-34A

Date of Analysis :20:52:06;27-Oct-2014  
Instrument Id : ANL-MCL1-LC-MS-002

4: Diode Array

Range: 3.052e+1

| Time | Height   | Area       | Area% |
|------|----------|------------|-------|
| 0.83 | 390392   | 19487.32   | 1.15  |
| 0.85 | 343284   | 12597.67   | 0.75  |
| 1.66 | 490643   | 25670.65   | 1.52  |
| 2.29 | 30321928 | 1453404.00 | 86.03 |
| 2.43 | 3124589  | 169976.31  | 10.06 |
| 2.90 | 493837   | 8286.02    | 0.49  |

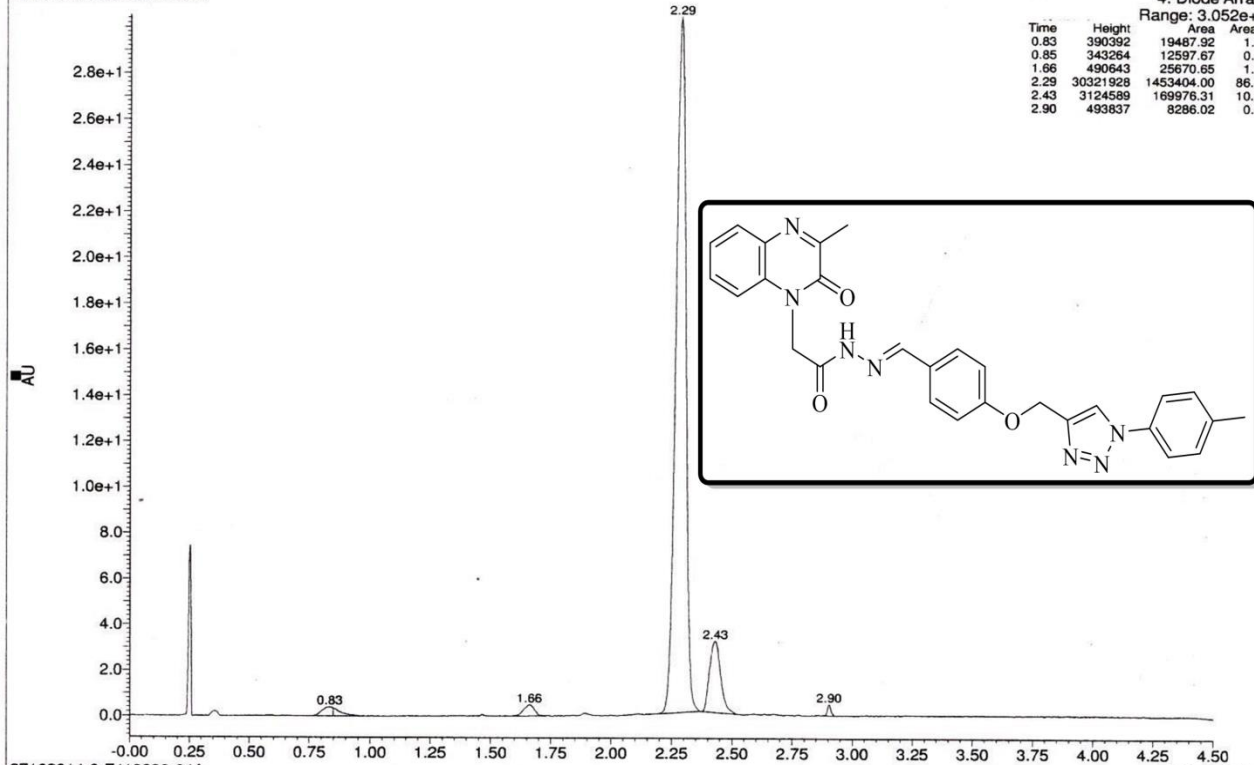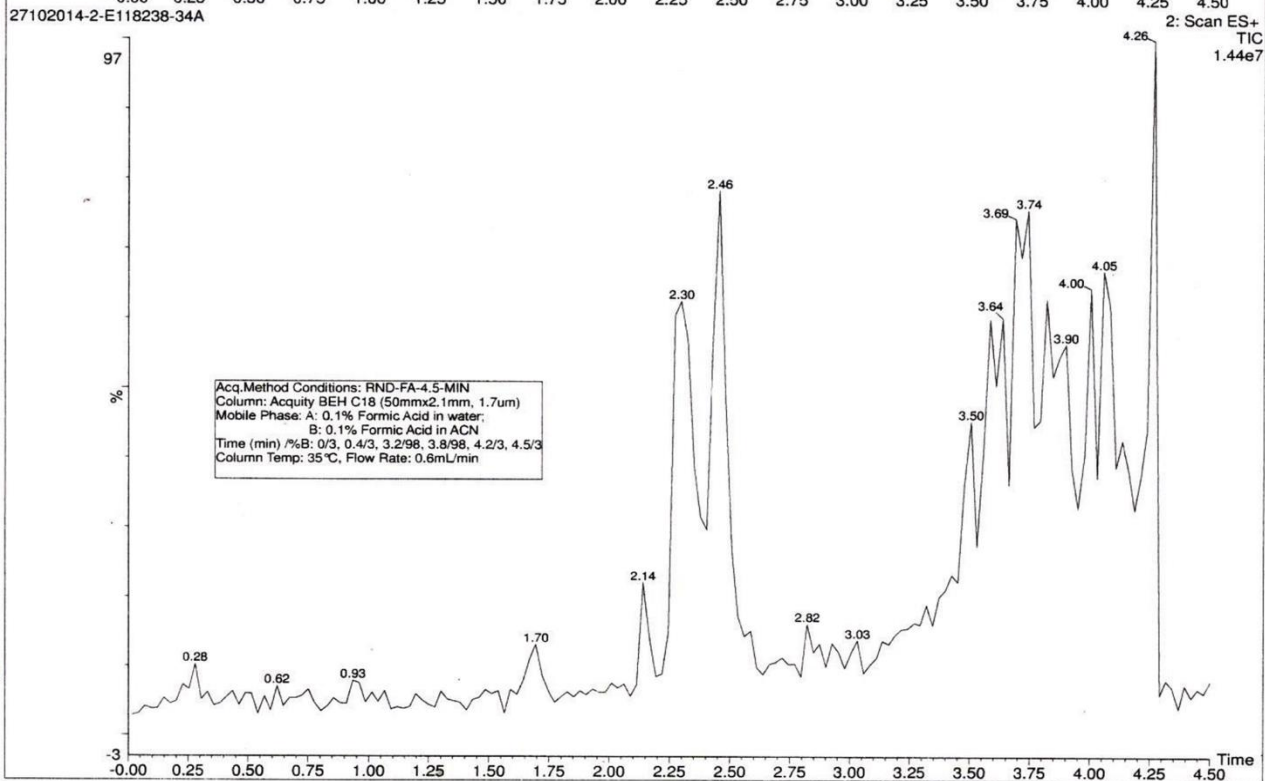

Mass spectrum of compound 15a

Print of window 79: Apex Mass Spectrum of Peak 7.433 of Z8-----020900.D  
 Apex Mass Spectrum of Peak 7.433 of Z8-----020900.D

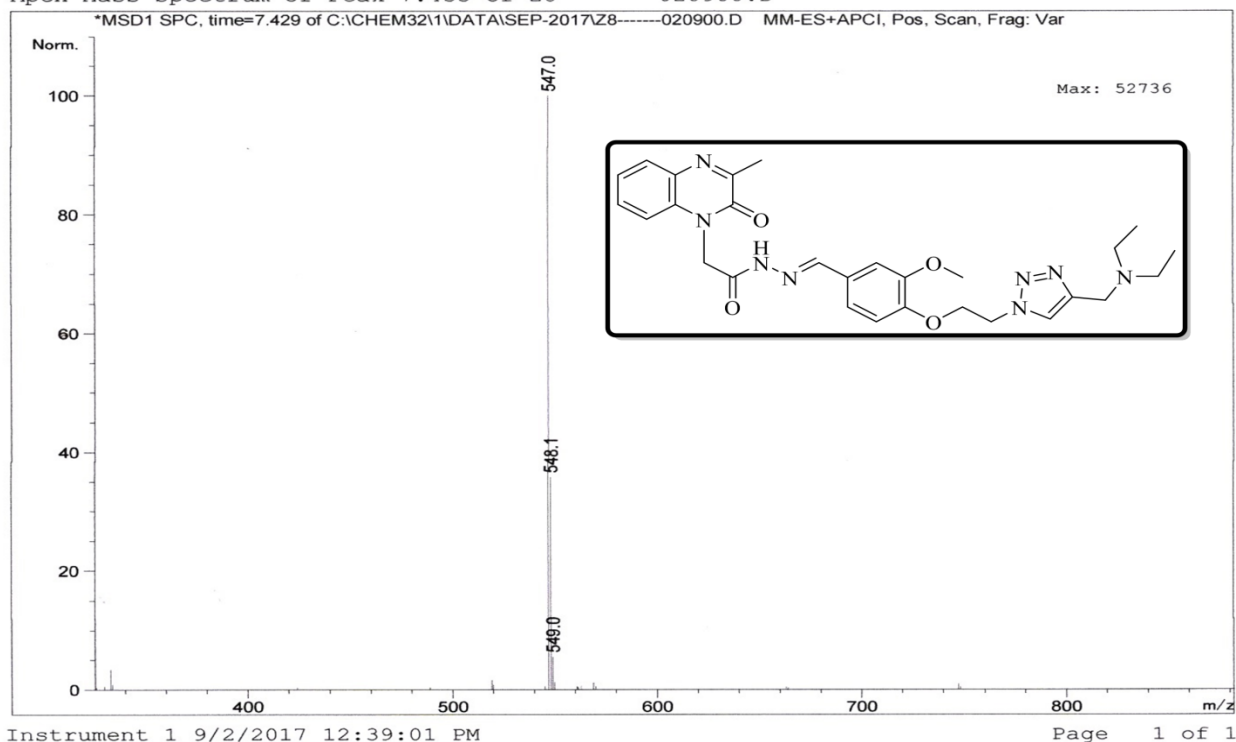

Mass spectrum of compound **14j**

## ==== Shimadzu LabSolutions Data Report =====

### <Spectrum>

Line#:2 R.Time:0.983(Scan#:60)  
 MassPeaks:285  
 RawMode:Averaged 0.850-1.383(52-84) BasePeak:522.25(55302)  
 BG Mode:Averaged 0.016-0.850(2-52) Segment 1 - Event 2

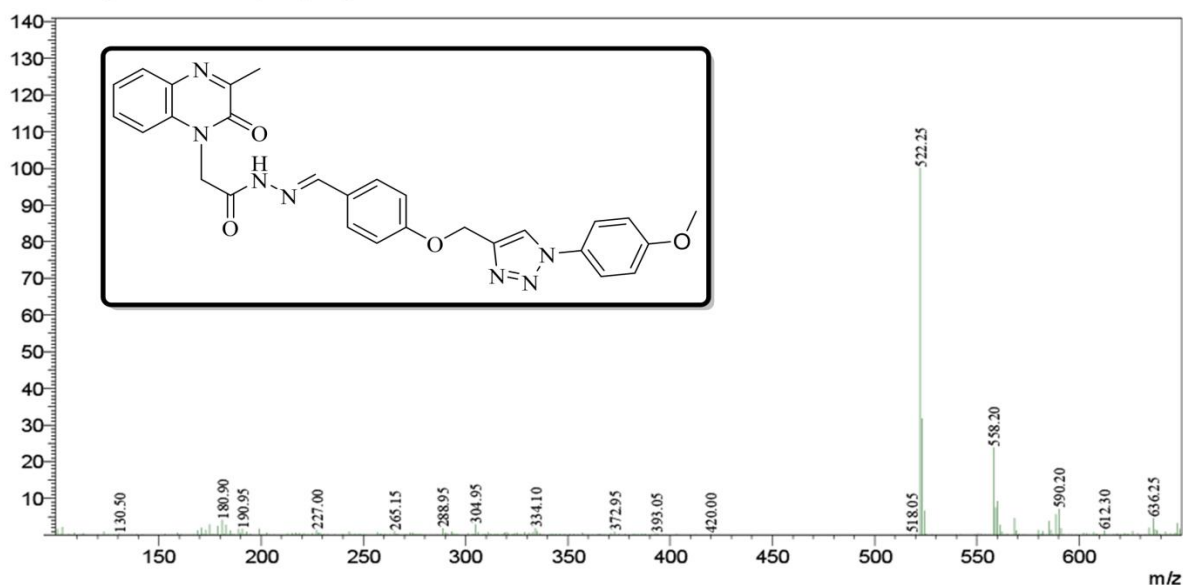

Print of window 79: Apex Mass Spectrum of Peak 6.342 of Z2-----010900.D  
 Apex Mass Spectrum of Peak 6.342 of Z2-----010900.D

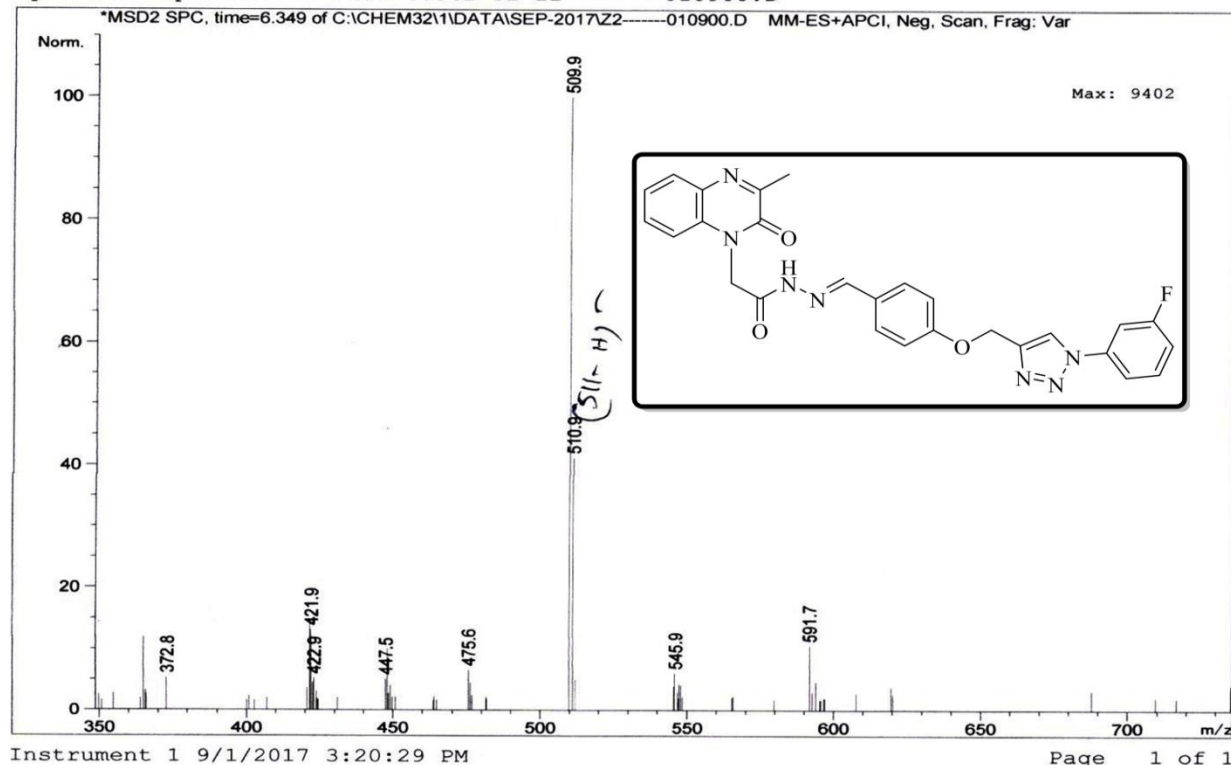

Mass spectrum of compound **15c**

Print of window 79: Apex Mass Spectrum of Peak 4.309 of Z1-----230800.D  
 Apex Mass Spectrum of Peak 4.309 of Z1-----230800.D

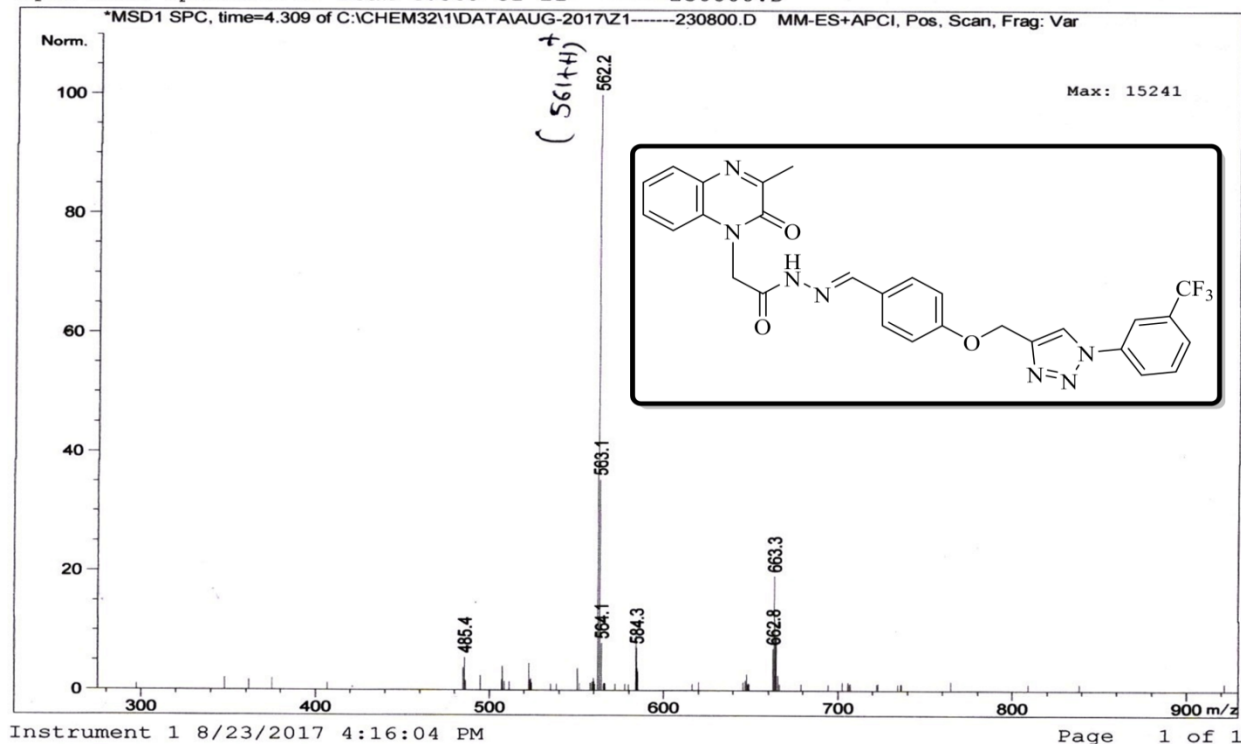

Mass spectrum of compound **15d**

# ==== Shimadzu LabSolutions Data Report ====

## <Spectrum>

Line#:2 R.Time:0.983(Scan#:60)  
 MassPeaks:362  
 RawMode:Averaged 0.650-1.650(40-100) BasePeak:526.15(40683)  
 BG Mode:Averaged 0.016-0.650(2-40) Segment 1 - Event 2

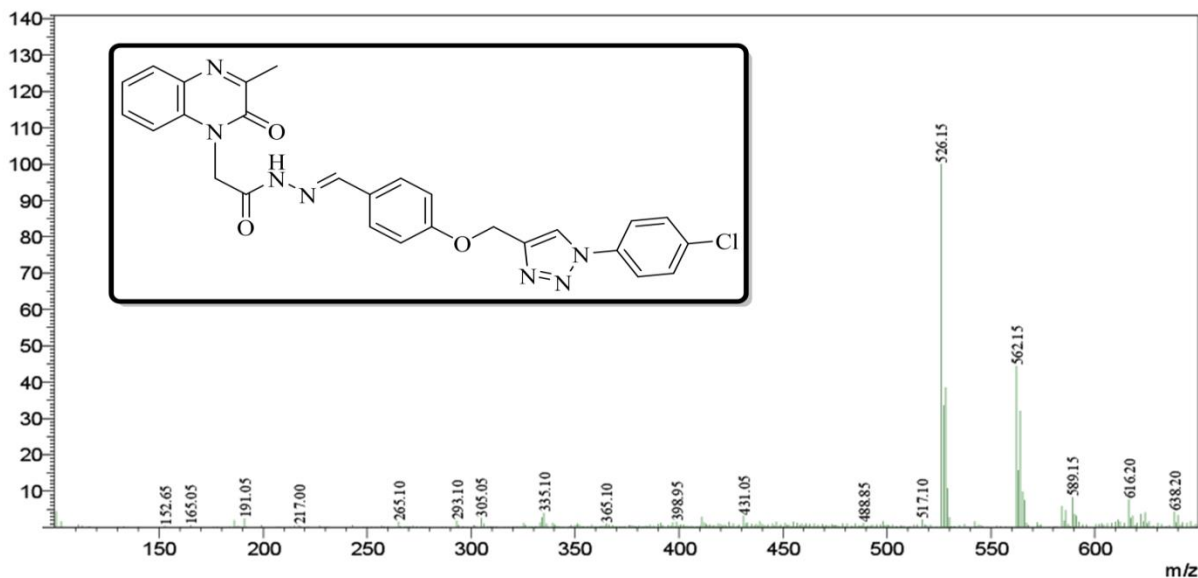

Mass spectrum of compound 15e

Print of window 79: Apex Mass Spectrum of Peak 4.315 of H2-----310500.D  
 Apex Mass Spectrum of Peak 4.315 of H2-----310500.D

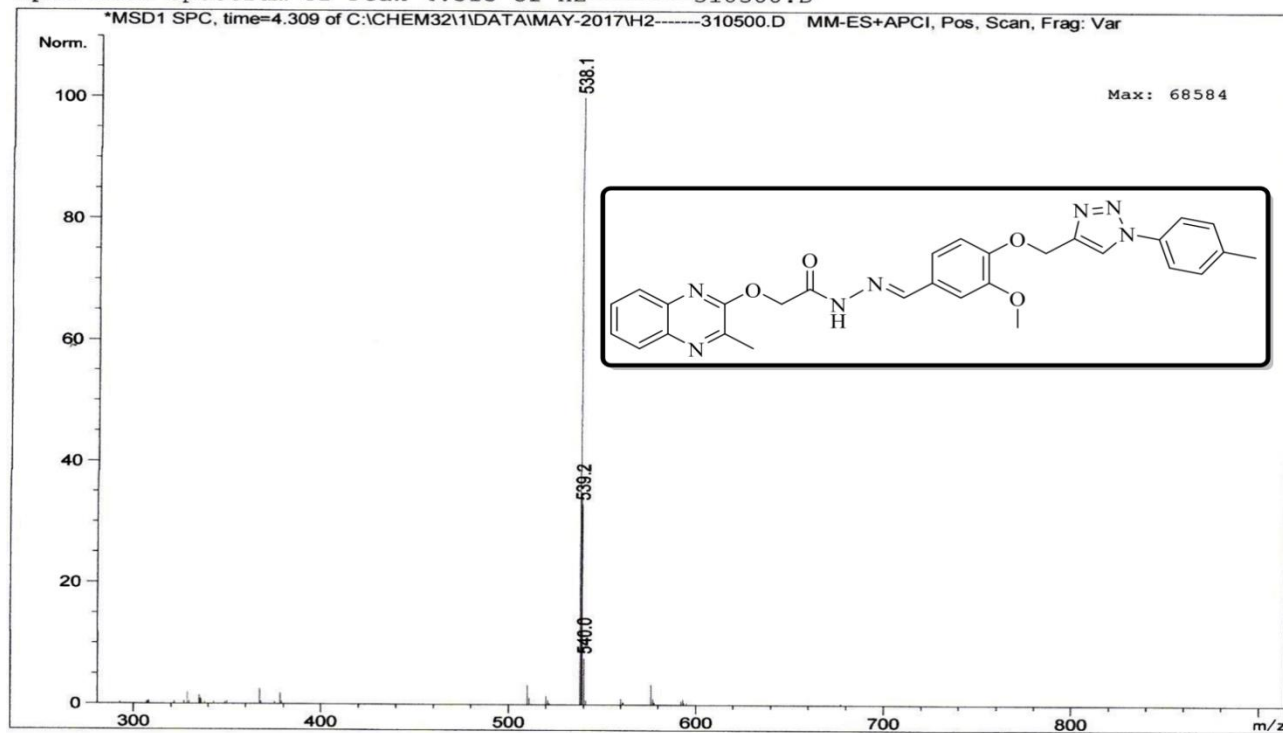

Instrument 1 5/31/2017 4:22:13 PM

Page 1 of 1

Mass spectrum of compound 16a

Print of window 79: Apex Mass Spectrum of Peak 5.312 of H7-----300800.D  
 Apex Mass Spectrum of Peak 5.312 of H7-----300800.D

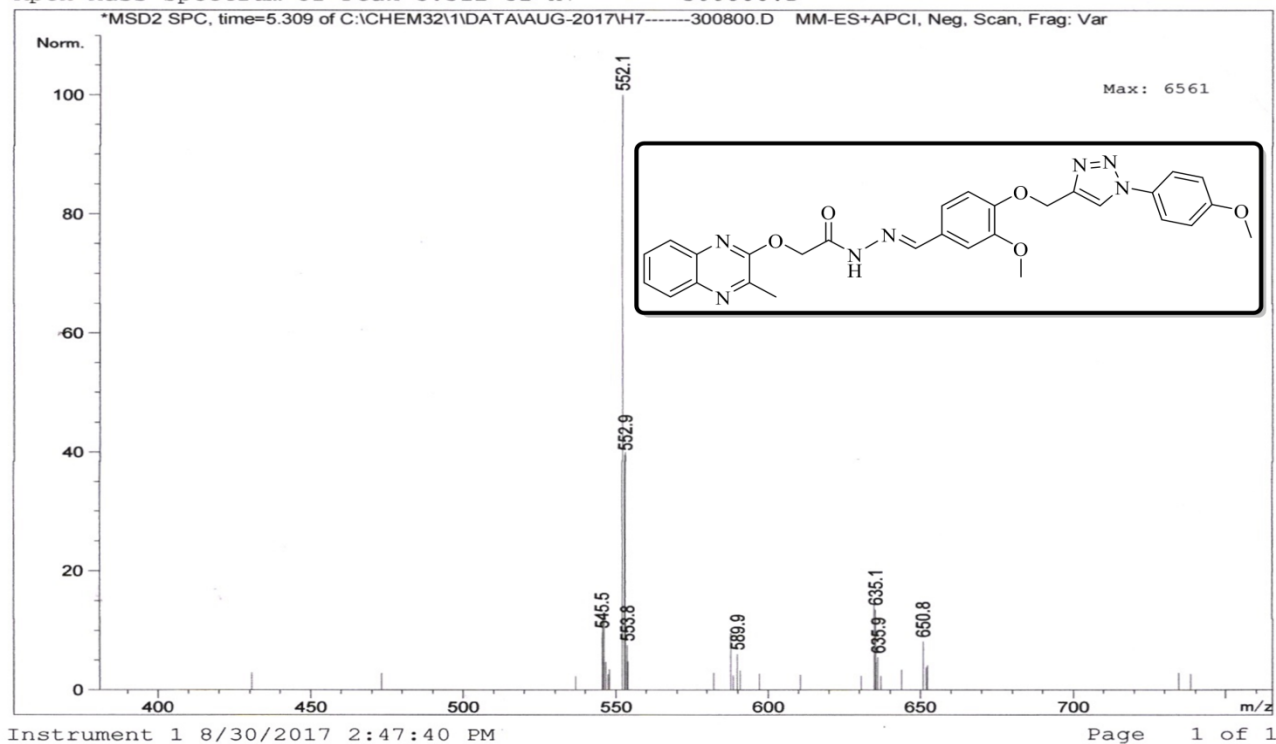

Mass spectrum of compound **16b**

Print of window 79: Apex Mass Spectrum of Peak 6.346 of H6-----070700.D  
 Apex Mass Spectrum of Peak 6.346 of H6-----070700.D

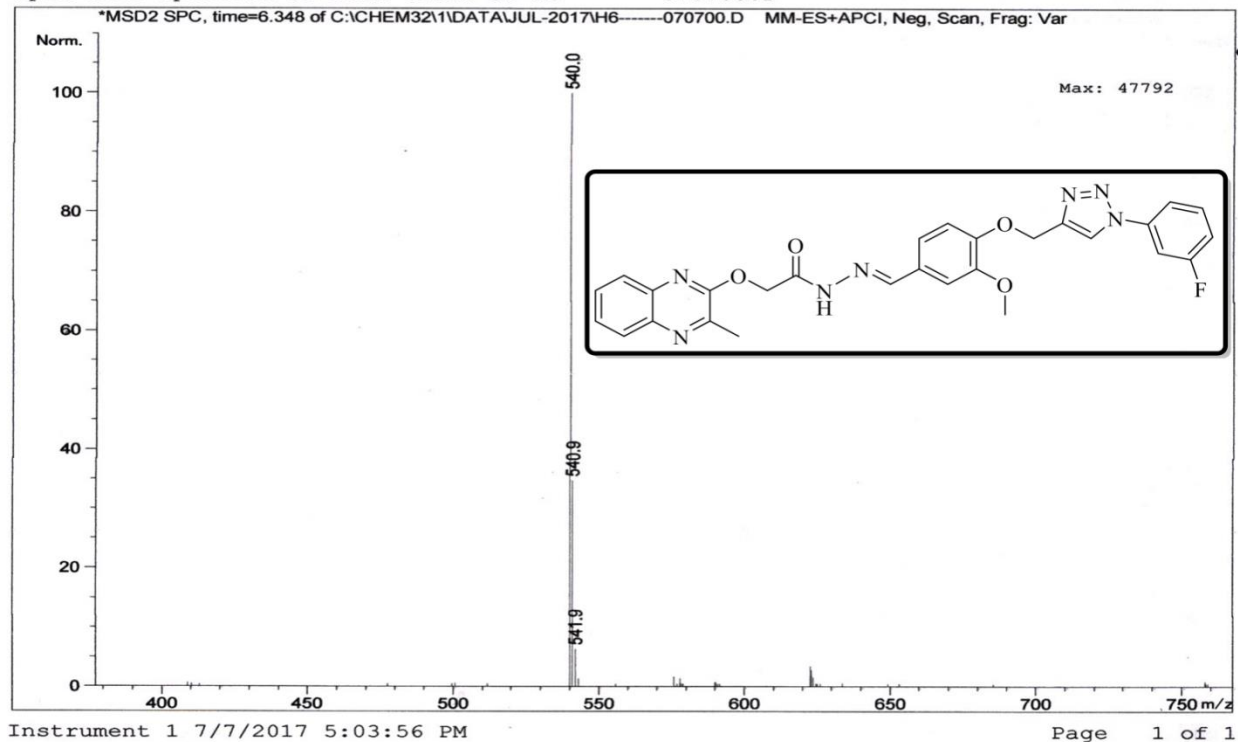

Mass spectrum of compound **16c**



Print of window 79: Apex Mass Spectrum of Peak 7.341 of H1-----310500.D  
 Apex Mass Spectrum of Peak 7.341 of H1-----310500.D

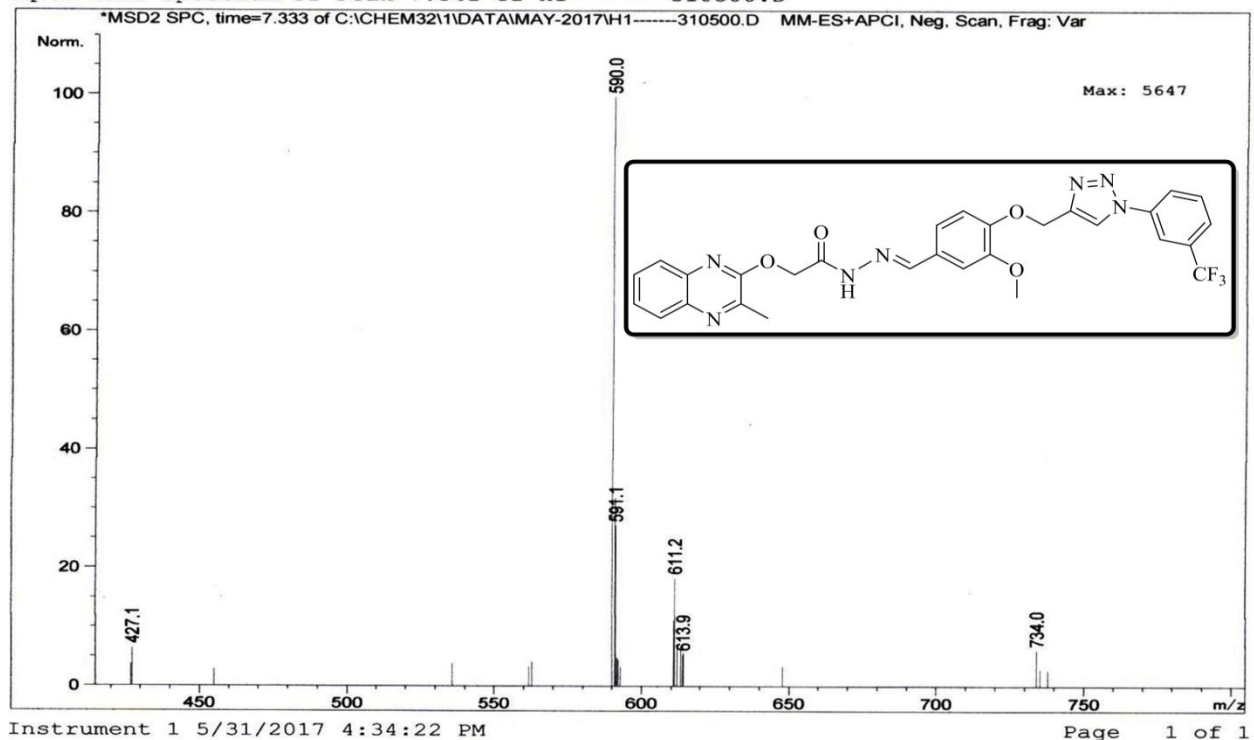

Mass spectrum of compound 16d

Print of window 79: Apex Mass Spectrum of Peak 5.314 of H8-----300800.D  
 Apex Mass Spectrum of Peak 5.314 of H8-----300800.D

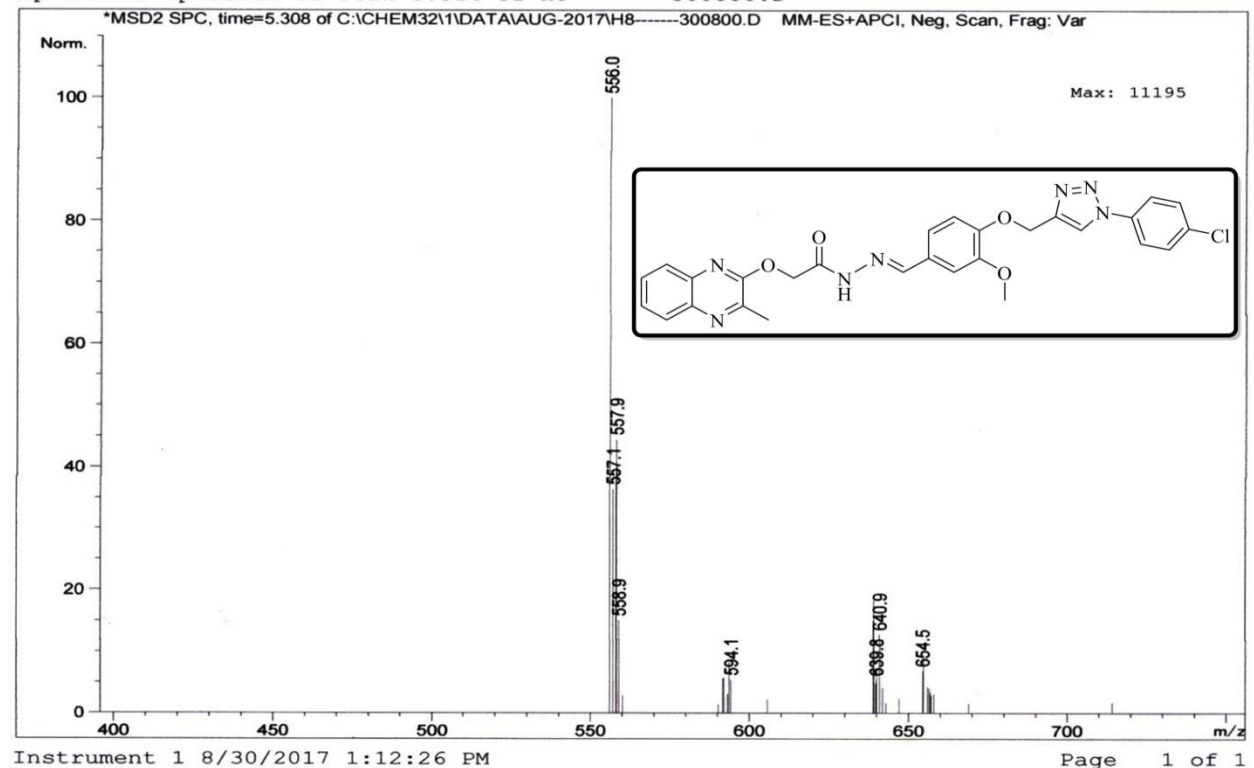

Mass spectrum of compound 16e
